1 **BMI Interacts with the Genome to Regulate Gene Expression Globally, with**  
2 **Emphasis in the Brain and Gut**

3  
4 Rebecca Signer<sup>1,2</sup>, Carina Seah<sup>1,2,4</sup>, Hannah Young<sup>1,2</sup>, Kayla Retallick-Townsley<sup>1,2,4</sup>,  
5 Agathe De Pins<sup>2</sup>, Alanna Cote<sup>2</sup>, Seoyeon Lee<sup>1,4</sup>, Meng Jia<sup>1,4</sup>, Jessica Johnson<sup>3</sup>, Keira J.  
6 A. Johnston<sup>1</sup>, Jiayi Xu<sup>1</sup>, Kristen J. Brennand<sup>4</sup>, Laura M. Huckins<sup>1</sup>

7  
8 **Affiliations**

- 9  
10 1. Department of Psychiatry, Yale University School of Medicine, 34 Park Street,  
11 New Haven, CT 06520, USA.  
12 2. Department of Genetics and Genomics Sciences, Icahn School of Medicine at  
13 Mount Sinai, New York, NY 10029  
14 3. Department of Psychiatry, University of North Carolina at Chapel Hill, 120 Mason  
15 Farm Road, Chapel Hill, NC, 27517, USA.  
16 4. Department of Psychiatry, Department of Genetics, Wu Tsai Institute, Yale  
17 University School of Medicine, 300 George Street, New Haven, CT 06520, USA.  
18

19 **Abstract**

20 Genome-wide association studies identify common genomic variants associated with disease  
21 across a population. Individual environmental effects are often not included, despite evidence  
22 that environment mediates genomic regulation of higher order biology. Body mass index (BMI)  
23 is associated with complex disorders across clinical specialties, yet has not been modeled as a  
24 genomic environment. Here, we tested for expression quantitative trait (eQTL) loci that  
25 contextually regulate gene expression across the BMI spectrum using an interaction approach.  
26 We parsed the impact of cell type, enhancer interactions, and created novel BMI-dynamic gene  
27 expression predictor models. We found that BMI main effects associated with endocrine gene  
28 expression, while interactive variant-by-BMI effects impacted gene expression in the brain and  
29 gut. Cortical BMI-dynamic loci were experimentally dysregulated by inflammatory cytokines in  
30 an *in vitro* system. Using BMI-dynamic models, we identify novel genes in nitric oxide signaling  
31 pathways in the nucleus accumbens significantly associated with depression and smoking.  
32 While neither genetics nor BMI are sufficient as standalone measures to capture the complexity  
33 of downstream cellular consequences, including environment powers disease gene discovery.

## 34 Introduction

35 The utilization of genetics in medicine has drastically expanded over the last 30 years  
36 through the identification of a growing body of rare and common genetic variation that  
37 contributes to diseases across specialties. While high penetrance rare variation can be tested in  
38 the clinic and is relevant to the clinical management of a subset of mendelian cases<sup>1,2</sup>, but the  
39 clinical translation of common variation, which cumulatively represents the bulk of heritability in  
40 complex traits, has proven more challenging<sup>3,4</sup>. Much success in identifying trait-associated  
41 common variants has come from genome-wide association studies (GWAS). This population-  
42 level approach maximizes power to identify disease-associated single nucleotide  
43 polymorphisms (SNPs)<sup>5</sup>, yielding hundreds of genome-wide significant loci across a very large  
44 number of complex traits. However, discovery of causal variants from GWAS is challenging; this  
45 difficulty stems from the complexity in pinpointing causal alleles from complex LD structures,  
46 translating population-level statistics to individual-level associations and, on a larger scale,  
47 because many of the common diseases in the clinic are multifactorial, i.e. due to a combination  
48 of genomic and environmental factors<sup>6</sup>. Moreover, GWAS will miss SNPs that are associated in  
49 only certain environmental contexts or SNPs with varying gene-by-environment (GxE) effect  
50 sizes<sup>7</sup>. Dynamic variant effects may be a core reason, in addition to ancestry and diagnostic  
51 bias, why population-level predictors derived from GWAS (e.g., polygenic risk scores) perform  
52 poorly on an individual level and have not successfully been translated to patient care. To truly  
53 capture the predictors of multifactorial disease development, we need to consider both genetics  
54 and environment in disease risk models.

55 A global finding from GWAS shows disorder risk-increasing SNPs are enriched for  
56 expression quantitative trait loci (eQTL) - variants with the functional capacity to regulate gene  
57 expression<sup>8</sup>. This enrichment of eQTLs may imply that the primary modality by which GWAS  
58 variants affect disease is through a cumulative impact of gene expression in disease-relevant  
59 tissues. Understanding eQTL architecture, and integrating these with GWAS summary statistics,  
60 yields biological insights and interpretability, for example allowing researchers to implicate a  
61 gene, tissue or cell type involved in the complex trait. However to-date, studies of eQTLs have  
62 focused on static associations despite evidence that eQTL activity may be highly context-  
63 specific, with dynamic effects sizes across tissues, cell-types, sex, hormonal state,  
64 developmental stage, and immune activation<sup>9,10,11,12,13,14</sup>, with implications for risk-estimates of  
65 common immunologic disorders and cell types<sup>10,11</sup>.

66 We propose that studies that integrate only static eQTL estimates fail to capture  
67 important context-specific associations. By characterizing and incorporating dynamic estimates

68 into eQTL architecture, and integrating these estimates with GWAS, we hope to move beyond  
69 static estimates and into a personalized understanding of dynamic risk. Here, we focus on body  
70 mass index (BMI), a key physiological context with potential relevance to many complex traits.  
71 Obesity, often defined as BMI of >30, is rising across the globe<sup>15</sup>, with important physiologic  
72 impacts including inflammation, oxidative stress, and hormonal dysregulation<sup>16,17,18</sup>. The  
73 combined morbidity of obesity-associated cardiometabolic, oncologic, psychiatric, and  
74 neurologic conditions is substantial<sup>19,20,21</sup>. Many efforts have been undertaken to use GWAS to  
75 identify factors associated with genomic susceptibility to these complex disorders<sup>22,23,24</sup>, yet no  
76 studies have evaluated the impact of the environment of obesity on genomic risk estimates. In  
77 this study we test whether BMI (body mass index: kg/m<sup>2</sup>), here used as a proxy for the  
78 endocrinologic physiologic environment, interacts with the genome to regulate gene expression  
79 across tissues. We aim to identify BMI-dynamic genomic variants, postulate cell-type specific  
80 regulatory BMI-dynamic mechanisms, and identify novel genes and pathways relevant to  
81 complex disease, which are missed with conventional GWAS approaches.

82 Previous work has shown that cell type proportion may be a key mediator in eQTL and  
83 environmental interactions<sup>25</sup> and is a vital consideration in defining gene-by-environment  
84 findings. To parse the impact of cell type on our BMI-dynamic eQTL effects, we perform cell  
85 type deconvolution across body systems and identify novel associations of BMI and cell fraction.  
86 We postulate cell-type specific dynamic mechanisms using transcription factor binding affinity  
87 prediction and human induced pluripotent stem cell (hiPSC)-derived glutamatergic neurons  
88 treated with pro-inflammatory factors. We build gene expression predictor models to predict  
89 tissue-specific gene expression from BMI and SNP interactions and discover novel genes that  
90 have a BMI-dynamic relationship with brain traits in a large-scale biobank.

91

## 92 **Results**

### 93 **Defining the Impact of BMI in the regulation of Gene Expression**

94 We implemented an eQTL linear regression framework to test for the main and  
95 interactive effects of SNPs and BMI on gene expression (**Fig 1A**). First, we followed the classic  
96 eQTL approach to identify the main effects of SNPs on expression without regard for  
97 environmental context; we term these **Base-eQTL** and **Base-eGenes**. The number of Base-  
98 eGenes was highest in the GTEx tissues with the largest sample size (cor=0.89), in line with the  
99 published GTEx v8 cis-eQTL analysis<sup>26</sup> (**Fig 1B**). To determine the impact of BMI directly on  
100 gene expression, we tested for differentially expressed genes in the context of BMI (**BMI DE-**  
101 **genes, Fig. 1C,1D**). We find BMI-DE genes in 18 non-brain tissues, with most in the endocrine

102 system including subcutaneous adipose (n=2341 genes), skeletal muscle (n=1894 genes), and  
103 skin-not sun exposed (n=1823 genes) (**Fig 1D**). We identified 7,563 total BMI DE-genes (FDR <  
104 0.05), 4,199 of which are negatively associated with BMI and 3,364 are positively associated  
105 (**Fig 1C**), including known BMI-associated genes such as *LEP*<sup>27</sup>, *SLC27A2*<sup>28</sup>, and *GPD1L*<sup>29</sup>.

106 We next examined whether BMI impacts gene expression indirectly through interactions  
107 with SNPs, called **BMI-eQTL**, and their associated eGenes, called **BMI-eGenes**, by adding an  
108 interaction term to the classic framework ( $Exp \sim SNP*BMI + SNP + BMI + PC1:20$ ). Because  
109 eQTL discovery is correlated with sample size, we applied QC specific to the large (n $\geq$ 500),  
110 medium (500>n $\geq$ 200), and small tissues (n<200). Among large tissues, subcutaneous adipose  
111 and non-sun-exposed skin contained the most BMI-eGenes. Among the mid-size tissues, brain  
112 cortex and transverse colon had the most BMI-eGenes, and within the small tissues nucleus  
113 accumbens (NAc), caudate in basal ganglia and small intestine had the most BMI-eGenes (**Fig**  
114 **1E,1F**). A portion of BMI-eGenes overlap both Base-eGenes and BMI DE-genes in  
115 subcutaneous adipose, however in cortex the majority of BMI-eGenes are not Base-eGenes  
116 (**Supplement Fig 2A-B**). Base-eGenes have greater overlap across tissues compared to BMI-  
117 eGenes (Average Szymkiewicz–Simpson (SS) overlap coefficient: Base-eGenes SS=0.67;  
118 BMI-Genes =0.066; **Supplement Fig 2C-D**).

119

## 120 **Characterizing BMI-eGenes Function and Interaction Direction**

121 Base-eGenes are generally tolerant to loss-of-function variation and have limited  
122 constraint in the genome, as opposed to GWAS hits which are more constrained<sup>30</sup>. We  
123 assessed whether BMI-eGenes show a similar pattern by annotating the probability of loss-of-  
124 function intolerance (pLI) score for our eQTL sets and testing for enrichment of high pLI scores  
125 in Base- and BMI-eGenes compared to background. We found that BMI-eGenes are enriched  
126 for loss-of-function intolerance in subcutaneous adipose (p=7.5x10<sup>-25</sup>), brain cortex (p=0.034),  
127 and cerebellar hemisphere (p=0.01) (**Fig. 2A**), while Base-eGenes have no enrichment of  
128 constrained genes. BMI-DE genes are enriched for constrained genes in subcutaneous adipose  
129 (p=1.9x10<sup>10</sup>), skeletal muscle (p=7.6x10<sup>-7</sup>), liver (p=4.4x10<sup>-2</sup>), and skin not sun exposed  
130 (p=6.9x10<sup>-4</sup>).

131 Gene set enrichment reveals that the Immunoglobulin complex is interactively regulated  
132 by SNPs and BMI in the stomach (p=3.9x10<sup>-3</sup>) and transverse colon (p=0.026). Cancer  
133 pathways are enriched across tissues, including cyclin D - associated events in G1 in minor  
134 salivary gland (p=0.043) and P-body in breast tissue (p=0.029), and oxidative damage response  
135 on colon-sigmoid (p=0.014) (**Fig. 2B**).

136 For subsequent analyses, we selected a subset of tissues across the sample size  
137 categories that had the most BMI-eGenes, including adipose subcutaneous and skin not sun  
138 exposed in the large category, transverse colon and brain cortex in the medium, and small  
139 intestine and nucleus accumbens (NAc) in the small. We added minor salivary gland due to the  
140 presence of numerous gene set enrichments and in total have seven tissues prioritized for  
141 future study.

142 Thus far, we have analyzed the properties of the significant eGenes identified in the  
143 eQTL analyses. To characterize the number of independent genomic loci in each cis region that  
144 regulate each eGene, we performed stepwise conditional analysis. We selected the  
145 independent SNPs from conditional analysis, called the top SNP(s), and identified SNPs in LD  
146 with the top SNPs to generate eQTL credible sets for each locus in the Base-eQTL and BMI-  
147 eQTL analyses. We find 10,451 credible sets of BMI-eQTL across the 7-tissue subset, including  
148 9,612 unique SNPs and 8,434 unique genes. Across tissues, Base-eGenes had more  
149 independent credible sets in the cis-region locus than BMI-eGenes, but there was a shared  
150 pattern of distribution across tissues (**Sup Fig 2E**).

151 To determine whether BMI\*SNP interactions have a predominant direction, i.e. if high  
152 BMI is most often associated with a reduction of eQTL activity, we characterized the  
153 directionality of the independent BMI\*SNP relationships. Using a decision tree based on  
154 categorical BMI models, we identified four possible directions: positive (absolute eQTL activity,  
155 i.e. beta, is larger at high BMIs), negative (absolute eQTL activity is larger at low BMI), flipped  
156 (eQTL activity is significant in high and low in opposite direction) (**Fig. 2C-2F**), and uncertain  
157 (**Fig 1A, Supplemental Figure 3A**). Across the seven tissues, 4,167 BMI-eQTL are positive,  
158 2,471 are flipped, 2,427 are negative, and 1,383 are uncertain. We found that the distribution of  
159 directions among BMI-eQTL were not shared across tissues. The negative direction was the  
160 largest category in cortex, NAc, skin, and small intestine while the positive direction was the  
161 largest category in subcutaneous adipose and salivary gland. We noted each tissue had BMI-  
162 eQTL in all possible directions (**Fig. 2G, Supp Fig 3A-B**).

163

### 164 **Parsing the Roles of Sequence and Cell Type in BMI Dynamic Processes**

165 We next asked whether BMI interacts with the genome at certain transcription factor (TF)  
166 binding sites by comparing TF binding affinity prediction between significant Base-eQTL and  
167 BMI-eQTL. There are 67 total nominal, and 53 FDR TFs significantly enriched in BMI-eQTL  
168 compared to Base (**Fig. 3A**). The majority of TFBS (37/53) are significant in one tissue, five TFs

169 are significant in two tissues, and two TFs, NFATC2 and NR4A2 are FDR significant in three  
170 tissues. Of note, FOXO3 is nominally significant in the most (5/7) tissues.

171 Our study uses bulk RNA sequencing data, including a combination of mRNA from all  
172 cell types in the sample. To determine whether cell type proportion plays a role in BMI-eGene  
173 discovery, we applied cell type deconvolution techniques (**Fig. 3B**). The association of BMI and  
174 cell fraction has been previously characterized in the adipose and endocrine system<sup>31</sup>, therefore  
175 we focused on (novel) brain, gut, and salivary gland.

176 BMI was significantly correlated with estimated cell type fractions of four immune cell  
177 types in salivary gland: T-helper cells (cor=0.16, p=0.044), macrophage Type 2 (cor=0.19,  
178 p=0.014), mast cells (cor=-0.16, p=0.035), and dendritic cells type 2 (cor=-0.26, p=6.4x10<sup>-4</sup>)  
179 (**Fig. 3C**). The positive association between BMI and macrophage is supported by analyses  
180 completed in adipose<sup>31</sup>. BMI was negatively correlated with estimated proportion of microglia in  
181 NAc (cor=-0.17, p=6.6x10<sup>-3</sup>) and with myeloid cells in the transverse colon (cor=-0.12, p=0.013).  
182 To determine the impact of cell fraction on BMI-eGene discovery, we repeated the interaction  
183 eQTL analysis correcting for cell fraction. A range of 33-65% of BMI-eGenes remain significant  
184 after cell type correction (Supplemental Figure 4A). Our data indicate that both immune cell type  
185 proportion and cis regulatory motifs underline the BMI-dynamic signal identified.

186 We identify enrichment of cell-type specific gene sets in genes significant after cell type  
187 correction in transverse colon (Fig 3E) and cortex (Supp). In colon, we find antibody-mediated  
188 complement activation is enriched in neuronal cells (p<sub>FDR</sub> =2.1x10<sup>-3</sup>), while myeloid cells have  
189 enrichment for insulin (p<sub>FDR</sub> =0.019) and GnRH (p<sub>FDR</sub> =0.018) signaling, among others. In  
190 endothelium, inflammatory factors including IL-6 (p<sub>FDR</sub> =0.036), IL-4 (p<sub>FDR</sub> =0.036), and  
191 INFA/INFB (p<sub>FDR</sub> =8.7x10<sup>-3</sup>) are enriched, while in the epithelial cells type II interferon (p<sub>FDR</sub>  
192 =0.023) is enriched. To test for cell types enriched with BMI-dynamic effects, we tested for  
193 differential enrichment of lead BMI-eQTL compared to Base-eQTL in specific cell types. We  
194 found that BMI-eQTLs were significantly enriched in T-cells in minor salivary gland (p<sub>FDR</sub>  
195 =6.5x10<sup>-4</sup>) and small intestine (p<sub>FDR</sub>=0.012), in endothelium in transverse colon (p<sub>FDR</sub> =0.039)  
196 and nominally enriched in endothelium in cortex (p=0.037) (**Fig 3E**).

197

### 198 **Deciphering Mechanisms of BMI Dynamic Effects using *in Vitro* Models**

199 Because BMI-dynamic processes are in part inflammatory, one possibility is that  
200 overactivated microglia may release proinflammatory cytokines that crosstalk with neurons  
201 <sup>32,33,34</sup>]. To empirically resolve whether inflammatory signals indeed mediate cortical BMI-eQTL  
202 activity in neurons, we conducted ATACseq on hiPSC-derived NGN2-induced glutamatergic



203 neurons at baseline and in the context of three acutely treated (48 hours) pro-inflammatory  
204 cytokines IL-6 (60 ng/uL), INFa-2b (500 UI/mL), and TNFa (100ng/mL)<sup>35</sup>. An adapted activity-  
205 by-contact (ABC) model using STARE<sup>36</sup> predicted dynamic enhancer-gene interactions across  
206 inflammatory contexts, linking BMI-eQTL to predicted target genes (**Fig 4A**). While only 37%  
207 (256/690) of base-eQTL top SNPs were active at baseline (ABC  $\geq$  0.1), 73% (141/194) of BMI-  
208 eQTL top SNPs were active at baseline. In most cases, BMI-eQTL top SNPs in the credible set  
209 were the SNPs with the maximum ABC score (max-ABC) for that gene (81%, 131/161), but this  
210 was not true from base-eQTLs, which were more likely to have a max-ABC that was in LD with  
211 the top SNP (33% 230/689).

212 In all BMI-eQTL sets, we identified 50 SNPs regulating 37 genes that have an ABC-  
213 score shift from vehicle  $\geq$  0.02 for at least one context (**Fig 4B**). INFa shifted the most BMI  
214 genes(n=42), while TNFa the least (n=23). Regulatory shifts for eQTL activity could be shared  
215 or distinct across contexts; for example, *ABHD12*, displayed a TNFa-specific shift. TF-binding  
216 disruption is predicted to underlie five of the genes identified (**Fig 4C**), with altered ZNF354C  
217 binding predicted to disrupt two genes *UBXN10* and *FARSA* found on different chromosomes.  
218 *SLC16A10*, a monocarboxylate transporter also called MCT10, showed context-wide regulatory  
219 shifts at two SNPs (rs6927687 and rs4945850), one of which (rs6927687) had a predicted  
220 impact on MZF1 binding and so was likely the BMI-dynamic regulatory SNP of *SLC16A10* (**Fig**  
221 **4D**), which had pan context-specific accessibility at its promoter region (**Sup Fig 4D**).

222

## 223 **Advancing Brain Trait Gene Discovery using BMI-aware Gene Expression Predictor**

### 224 **Models**

225 Our results show that BMI interacts with the genome to regulate gene expression.  
226 Predicting gene expression from genotype is well established and allows researchers to add  
227 gene- and tissue- level context to GWAS studies. However, available predictor models have  
228 focused on prediction only using genomic data, called genetically regulated gene expression  
229 (**GREx**). Here, we created new predictor models that incorporate BMI, allowing prediction of  
230 dynamic, context-specific gene expression. We trained predictor models that include main  
231 effects of genotype, BMI, and interaction terms, and compared our BMI-dynamic models to  
232 existing GREx predictors using PredictDB-PrediXcan<sup>37</sup> (**Fig 5A**). BMI-dynamic models  
233 significantly predicted fewer genes ( $N_{\text{GREx}}=3670-8650$ ,  $N_{\text{BMI-dynamic}}=1653-5508$ ) (**Fig 5B**), with  
234 both shared and novel genes compared to GREx predictor models ( $N_{\text{novel}}=262-361$ , **Sup Fig**  
235 **5B**). For genes that have models made using both methods, BMI-dynamic models that include  
236 interaction terms explained significantly more variance in gene expression than GREx models



237 ( $p_{\text{adipose}} = 2.58 \times 10^{-35}$ ,  $p_{\text{cortex}} = 5.13 \times 10^{-23}$ ,  $p_{\text{NAc}} = 3.08 \times 10^{-23}$ ,  $p_{\text{skin}} = 7.85 \times 10^{-28}$ ,  $p_{\text{small intestine}} = 7.32 \times 10^{-19}$ ,  $p_{\text{colon}} = 4.01 \times 10^{-21}$ ) (Fig 5C). We found that BMI is primarily included as only a main effect  
238  
239 in endocrine tissues, including skin and subcutaneous adipose, while in the brain and gut we  
240 predominately found interactive effects and minimal BMI main effects, which mirrored the results  
241 from the BMI DE-gene and BMI-eGene analysis (Fig 5D).

242 We hypothesized that by applying BMI-dynamic predictor models to brain traits, we may  
243 enhance gene discovery over methods that predict using only SNP effects. We applied our  
244 models to predict BMI-dynamic gene expression in cortex, NAc, and subcutaneous adipose for  
245 all UK Biobank participants, and tested for the association of predicted expression with  
246 depression and current smoking (Fig 6A). Across tissues and traits, BMI-dynamic models  
247 identified more significant associations (Fig 6B) compared to GREx models. Most of these  
248 additional associations occurred in genes where the BMI-dynamic predictors include BMI as a  
249 main effect with or without an interaction (Fig 6D). The significant gene associations in  
250 depression in NAc ( $p = 0.011$ ) and adipose ( $p = 0.03$ ) were enriched with nominally significant S-  
251 predixcan MDD-GWAS hits (Sup Fig 6A). In the NAc, the MHC locus is enriched in the BMI-  
252 dynamic depression association ( $p\text{FDR} = 9.13 \times 10^{-5}$ ) driven by genes *HLA-G*, *HLA-DQB2*, *HLA-*  
253 *DMB*, and *HLA-DMA* (Fig 6C). We identified enrichment in the BMI-dynamic NAc association for  
254 glutathione peroxidase ( $p\text{FDR} = 0.029$ ) in smoking and hydrolase activity ( $p\text{FDR} = 0.029$ ) in  
255 smoking and depression, both components of the oxidative stress pathways. The significant  
256 BMI-dynamic trait-gene associations are not commonly shared across tissue, with more overlap  
257 across traits (Sup Fig 6D-H).

258 We compared the published GREx and BMI-dynamic associations in the NAc smoking  
259 associations and found a subset of the BMI-dynamic model genes only contain SNPs as  
260 predictors but are not significant in the published GREx analysis (Sup Fig 6B-C). In this set, we  
261 find genes that overlap our BMI-eGene analysis and iPSC analysis, including *ABHD12*,  
262 indicating they may be BMI-dynamic while not including BMI as a main or interactive effect in  
263 the model. We surmise that these genes have BMI effects of expression which have been  
264 preserved in our BMI-specific RNA sequencing quality control but were not in the BMI-agnostic  
265 QC from previous studies.

266 We found 215 genes in adipose and nine genes in cortex significant in the BMI-dynamic  
267 depression and smoking associations that were also significant BMI-eGenes. To identify  
268 phenotypic associations beyond depression and smoking, we tested for the nominal association  
269 across GWAS traits using S-Predixcan in the nine cortex overlap set (Fig 6E). Of the nine  
270 genes, seven have PredictDB-GREx models published and can be used with the S-Predixcan

271 tool. Of note, this analysis will not capture the true breadth in association, as S-Predixcan is  
272 based on models that do not learn BMI effects, but it gives insight toward nominal associations  
273 that might be stronger when BMI is considered. We see most of the genes (6/7) are nominally  
274 significant in the height or BMI GWAS, indicating these SNPs might serve as both a predictor for  
275 BMI and have dynamic regulatory action in the context of BMI. The gene *SNUPN* has the most  
276 associations across traits including attention-deficient hyperactivity disorder, type 2 diabetes,  
277 Tourette syndrome, Alzheimer's disease, height, autism spectrum disorders, and age at  
278 menopause.

279

## 280 **Discussion**

281 In this work we demonstrate that BMI interacts with the genome to (dys)regulate gene  
282 expression within and beyond the endocrine system. Gene-by-BMI effects on gene expression  
283 in the brain are most pronounced in the reward regions including the basal ganglia and cortex,  
284 but not in classical obesity-associated regions such as the hypothalamus, which had the third  
285 lowest number of genes regulated by BMI\*SNP interactions across tissues. The observation  
286 that the striatum has more BMI-dynamic genetic regulation than the hypothalamus expands our  
287 understanding of the variety of brain regions involved in metabolic response. We note that we  
288 did not identify any FDR significant BMI-differentially expressed genes in the brain; instead, BMI  
289 DE-genes were primarily found in endocrine tissues. This is intuitive as the endocrine system is  
290 responsible for adapting to the fed or fasted state while the brain is protected from direct BMI  
291 effects. Adipose and cortical BMI-eGenes were enriched for genes that are highly constrained,  
292 and thus more vital for reproductive fitness. Previous work has shown that classic eQTL are  
293 generally less constrained while GWAS hits demonstrate greater constraint<sup>30</sup> which constitutes  
294 a core difference between eQTL and GWAS that limits colocalization and the mapping of  
295 common eQTL to disease trait. We show here that context-specific eQTL look more like GWAS  
296 hits in terms of loss-of-function intolerance and may be more likely to be trait-associated.

297 The epidemiological associations of BMI with adverse outcomes such as all-cause  
298 mortality exhibit a U-shaped pattern of effect, where mortality is increased at low and high ends  
299 of the BMI-spectrum<sup>38</sup>. To identify eQTL effect differences at high versus low BMI, we  
300 implemented a directionality analysis of BMI-eQTL using categorical BMI eQTL models. We find  
301 that BMI-eQTL can exhibit multiple patterns, where some eQTL are more active at high and  
302 others at low, and there is not an apparent pattern across tissues. In the adipose, BMI-eQTL are  
303 most often active at high BMI whereas in the brain most are more active at low BMI, but eQTL in  
304 both directions exist in both. This highlights the pattern of BMI-dynamic effects described, some

305 people may have more eQTL active, and be more susceptible, at high BMI and others at low.  
306 Further work about context-wide susceptibility scores is needed to precisely sum the effects of  
307 trait risk in the context of environmental factors.

308 We used the publicly available dataset GTEx to explore these relationships, however  
309 GTEx is a postmortem dataset and does not represent the full range of BMI, especially the very  
310 low and very high BMI ranges. Additionally, the associations of BMI and health outcomes are  
311 reported to be related to sex, age, and developmental stage<sup>39,40</sup>, which are not represented in  
312 just one dataset and may impact replication when applying to other datasets with different  
313 demographic features. Further research into the timing of BMI-SNP relationships in the context  
314 of age and sex are vital to parsing the impacts of the interactions identified above.

315 Previous literature has shown that obesity impacts cell type proportion in adipose tissue,  
316 where macrophage infiltration and abundance increases in the context of obesity<sup>41</sup>, and in the  
317 brain where volume loss and microglial activation are noted<sup>42,43</sup>. We see a similar pattern of  
318 correlation between microglia and BMI in the nucleus accumbens, however the correlation is  
319 negative. Previous reports have shown that over-activated microglia are targets of apoptosis<sup>44</sup>,  
320 which may be an explanation for the negative relationship. We found that the surrogate  
321 variables used to residualize the expression matrix correlated with cell fraction and therefore are  
322 corrected for in our BMI-eQTL equation- however we preserved the effects of BMI in the  
323 residualization and therefore a portion of our signal may still be due to BMI effects on cell type  
324 that are difficult to deconvolute. This is a limitation of the study and should be addressed in  
325 single cell datasets with BMI as a measure in donors to validate our findings.

326 We find evidence that the expression of genes in inflammatory pathways such as IL-6  
327 and INFA/B/G are interactively regulated by SNPs and BMI in the endothelium of the transverse  
328 colon. The literature reports IL-6, TNFa, and interferons<sup>45,46</sup> (among other inflammatory factors)  
329 underlie the physiologic effects of obesity. The endothelium has been attributed to both  
330 response to and production of immune responses<sup>47</sup>, and this work highlights the role of the  
331 colonic endothelium as a BMI-dynamic pro-inflammatory cytokine producer, which may be a  
332 vital aspect of inflammatory gut disorders.

333 We hypothesize that, in the brain, overactive microglia secrete pro-inflammatory  
334 cytokines<sup>48,49,50</sup> which cross-talk with neurons<sup>51,32</sup>, and induce the BMI-dynamic loci identified in  
335 this study. We tested this hypothesis by washing a glutamatergic iPSC neuronal system with  
336 pro-inflammatory cytokines, measuring baseline and context-specific chromatic accessibility  
337 with ATACseq in neurons, and testing for overlapping effects with BMI-eQTL using an activity-  
338 by-contact model. We find evidence that pro-inflammatory cytokine signals mediate context-

339 specific regulation for several BMI-eGenes in shared and distinct cytokine patterns. Surprisingly,  
340 we see the most context-specific shifts in our data in the context of interferon-alpha, which is  
341 less often cited as a player in obesity than TNFa and IL-6. Further work on the interrogation of  
342 interferon-mediated inflammation in the CNS and nucleus accumbens, including the effects of  
343 INF-G, should be completed<sup>52</sup>. Additionally, iPSC systems model fetal-like cell states while the  
344 effects found here were in postmortem adult. Synchronization of developmental stages may  
345 identify even more overlap.

346 We have shown that the functional capacity to regulate gene expression for a subset of  
347 SNPs is not static in a population, and instead is dynamic in the context of their physiology. This  
348 has implications for modeling BMI-associated complex disease genetic associations. We have  
349 shown that by adapting genomic predictor models to include the effects of BMI, we find more  
350 disease-associated genes. We find more disease-associated genes despite a lower number of  
351 significant models compared to the gold-standard GREx approach using Predixcan-PredictDB.  
352 This may be due to differences in quality control such as a more lenient MAF threshold or the  
353 decision to use the entire ancestry cohort<sup>53</sup>. It also may be a byproduct of the different machine  
354 learning models used, reflected by the differing number of features selected. A final contributor  
355 is the increased variance explained in gene expression denoted by BMI-aware models, which  
356 capture additional direct and indirect effects of BMI. If the field can adapt GWAS and post-  
357 GWAS approaches including polygenic risk scores to be environment-aware and fit for the  
358 individual, we likely will see better predictive performance in the clinic.

359 The gene discovery powered by environment-aware modeling is not only relevant for risk  
360 prediction, but also highlights molecular pathways associated with BMI-associated disorders  
361 that may be targeted for therapeutics. We find evidence that depression is a metabo-immune  
362 disorder in the brain with enrichments in both the MHC region and various metabolic pathways.  
363 Hydrolase activity on carbon-nitrogen bonds, which is driven by signal is *DDAH1*, *AGA*,  
364 *HDAC10*, and *GLS*, was significant in both depression and smoking in the nucleus accumbens.  
365 *DDAH1* is a nitric oxide synthase regulator and knockout of this gene impacts dopamine  
366 metabolism<sup>54</sup>. The nitric oxide (NO) has been implicated across psychiatric disorders including  
367 depression<sup>55,56</sup> and has been successfully targeted in mice for prevention of stress-induced  
368 depression<sup>57</sup>. Here we show that metabolism of NO is regulated jointly by SNPs and BMI in the  
369 nucleus accumbens and associated across psychiatric disorders, proving one potential  
370 mechanism of NO effect in the brain.

371 We see other mechanisms of oxidative stress in our analyses including the significant  
372 enrichment of glutathione peroxidase pathway, driven by *GPX1* and *GSTP1*, in the smoking

373 analysis in NAc, oxidative damage response in BMI-eGenes in the sigmoid colon and  
374 cytoplasmic stress granule in the breast. *ABHD12*, a lipase that, when knocked out in activated  
375 microglia, have altered morphology and increased phagocytosis<sup>58</sup>, was significant in all three  
376 analyses: it is a BMI-eGene, that is dynamic in the context of TNF $\alpha$  in iPSCs and significant in  
377 the smoking TWAS in the UK Biobank in cortex and NAc. *ABHD12* expression increases in the  
378 context of an inflammatory stimulus and tempers phagocytosis to reduce oxidative stress<sup>58</sup>.  
379 Oxidative stress has been linked to cancers, neurologic disorders, gastrointestinal disorders,  
380 and here we show it is regulated by common genetic variants and individual environment. We  
381 are providing the BMI-dynamic gene expression models for public use to promote future studies  
382 across disorders.

383 From these results, we assert that individuals carrying a varying number of BMI-  
384 dynamic SNPs can have gene expression that is more dynamic, or perhaps dysregulated, in the  
385 context of a changing BMI than individuals without these BMI-dynamic SNPs. This work  
386 supports the guidance that medical counseling on BMI as an isolated measure is insufficient to  
387 capture the personalized nature of risk for obesity-associated disorders. BMI is a useful tool in  
388 that it is free and easy to measure and represents an individual's weight change over time; but  
389 we are continually recognizing that BMI as a stand-alone is inadequate when defining individual  
390 risk or comparing across populations. Genetic effects, which can be elicited with a family  
391 history, in combination with environmental effects such as BMI changes, sex, age, and  
392 psychosocial factors need to be considered in unison while providing counseling and running  
393 genomic models related to multifactorial disorder risk.

394

## 395 **Methods**

396 We analyzed transcriptome samples released in the GTEx freeze v8<sup>26</sup>. In brief, GTEx is  
397 a publicly available resource which includes deceased donor health questionnaire, postmortem  
398 whole genome sequencing, and transcriptome (mRNA) sequencing from one or more tissues.  
399 For genomic association testing, we required each tissue have a sample size of 100 samples,  
400 which resulted in 48 tissues included in subsequent analyses. A detailed description of  
401 biospecimen collection, analyte extraction, and GTEx-completed quality control (QC) is  
402 available in the version 8 release text and supplement.

403

## 404 **Subject and sample outlier removal**

405 We plotted and visualized tissue sample attributes to remove samples with outlying RIN,  
406 end base mismatch rate, transcripts detected, alternative alignment, brain weight, and split

407 reads. We excluded height, weight and BMI outliers (+- 3SD) as well as individuals with an  
408 amputation. We excluded four individuals who had outlying height values and one individual  
409 with an outlying weight listed. The GTEx dataset ranges in age from 21-70 years with a median  
410 age of 55 and is 67% male. Race of the cohort is reported to be 86% white, 11% black, 1%  
411 Asian with remaining contributions from Native Americans and unknown. We chose to include  
412 all ancestries in eQTL generation to maximize sample size and application<sup>53</sup>. The BMI range in  
413 GTEx is 17.03-35.05 kg/m<sup>2</sup>. The median and mean BMI in this study are 27.37 and 27.33 kg/m<sup>2</sup>  
414 respectively, compared to the most recent mean BMI of 30 kg/m<sup>2</sup> in the United States from  
415 2020<sup>59</sup>.

416

### 417 **Transcriptome (RNA) sequencing processing**

418 The GTEx transcriptome release transcripts per million (TPM) and read counts, which  
419 were aligned to human reference genome GRCh38/hg38 and quantified based on GENCODE  
420 release v26. In R v4.0.3, we retained transcripts annotated as autosomal lncRNAs, protein  
421 coding, and immune-related genes. We filtered out lowly expressed genes, requiring genes  
422 have greater than or equal to 6 reads and greater than or equal to 0.1 TPM in at least 20% of  
423 samples in each tissue. We normalized read counts between samples using TMM in the edgeR  
424 v3.32.0 package<sup>60</sup>. We applied a winsorize function, so that any samples deviating more than  
425 three standard deviations (sd) from the mean were set to the three sd limit. We used voom from  
426 the limma<sup>61</sup> v3.46.0 package to transform the normalized count data to log2 counts per million  
427 (logCPM). In order to detect hidden sources of variation such as batch or age that might  
428 confound association analyses while still retaining the effect of the environmental variable BMI  
429 we used the surrogate variable analysis v3.30.1 package<sup>62</sup>. We calculated the number of  
430 surrogate variables (SVs) to create using the “be” method in the sva package. Finally, we  
431 residualized the logCPM matrix with limma to correct for the SVs. This tissue-specific residual  
432 gene expression matrix was used for subsequent linear models.

433

### 434 **Whole genome sequencing (WGS) processing**

435 We began our quality control with the final v8 phased VCF file provided by GTEx, which  
436 contains 46,526,292 sites. A detailed description of QC to generate this final is available from  
437 the GTEx consortium v8 supplement. Using plink v2<sup>63</sup>, we retained only autosomes and  
438 removed insertion-deletion (indel), multi-allelic sites, and ambiguous SNPs. We removed  
439 variants with missingness greater than 1% (--geno 0.01) or that deviated from Hardy-Weinberg  
440 equilibrium (HWE) (--hwe 0.000001). We removed samples with greater than 1% genotype



441 missingness (--mind 0.01). To identify the largest sources of variance in the genotype data due  
442 to factors such as population structure we generated principal components (--pca) which were  
443 later used as covariates in eQTL linear models.

444

#### 445 **Expression quantitative trait loci mapping**

446 Toward our goal of understanding the effects of BMI on the genetic regulation of gene  
447 expression, we first ran a BMI differential expression (DE) analysis (**Eq 1**).

#### 448 **Equation 1. BMI-DE Analysis: Expression ~ BMI + PC1:20**

449 For the DE analysis, we applied a genome-wide FDR correction and report  $FDR < 0.05$ .  
450 We next generated three sets of eQTLs using the R package MatrixEQTL\_v2.3<sup>64</sup> using a cis-  
451 eGene window distance of 1e6. We set a MAF threshold of 10% for tissues with 199 or less  
452 samples, 5% for tissues with 200-499 samples, and 1% for tissues with 500 samples and over<sup>65</sup>.  
453 We identified significant eGenes using a hierarchical multiple testing correction procedure by  
454 first applying a local correction using eigenMT<sup>66</sup>. We then selected the smallest local adjusted p-  
455 value for each eGene across the genome and applied a genome-wide Benjamini & Hochberg  
456 (BH) FDR correction<sup>65</sup>. The first eQTL set, “Base-eQTLs”, (**Eq 2**) are blind to BMI and identified  
457 using with the modelLINEAR function in MatrixEQTL.

#### 458 **Equation 2. Base-eQTL Analysis: Expression ~ BMI + PC1:20**

459 Bas-eQTLs are akin to the bulk cis-eQTLs called the seminal GTEx v8 manuscript, with  
460 slight differences in QC and significant threshold assignment. The second set of eQTLs are  
461 “Interaction-eQTLs” and generated by adding an interaction term to the base model (**Eq 3**) with  
462 the modelLINEAR\_CROSS function.

#### 463 **Equation 3. Expression ~ SNP + BMI + SNP\*BMI + PC1:20**

464 We assessed significance of the beta coefficient of the interaction using the multiple  
465 testing procedure outlined above. Genes with at least one significant SNP are referred to as  
466 BMI-eGenes. Lastly, we calculated a “categorical-eQTL” set by subsetting the within-tissue  
467 cohort into BMI quintiles and calculating Base-eQTLs (**Eq 2**) within quintile. We identify  
468 significant BMI-eGenes using the coefficients of the interaction models and use the categorical  
469 models to annotate the directionality of the significant interactions.

470

#### 471 **Testing assumptions of OLS in the significant eQTL models**

472 We next sought to determine if the significant BMI-eQTL models met the assumptions of  
473 ordinary least squares (OLS) regression as often as Base-eQTL and were robust significant  
474 associations. There are four assumptions of OLS: linearity of the predictor and response,



475 independence, normality of the errors, and homoscedasticity (constant error variance). The  
476 relationships of SNP and expression are assumed to be linear, as is the case in the eQTL  
477 literature. Additionally, relationships of BMI and SNP on expression were visualized and are  
478 depicted in Figure 2 and in the supplement. Independence also is satisfied as the data is not  
479 time-series. We statistically tested the assumption of normality for each model using the  
480 Shapiro-Wilk test, `shapiro.test()` in stats base R. We assessed the assumption of  
481 homoscedasticity using the Koenker's studentized version of the Breusch-Pagan test, `bptest()` in  
482 the `lmtest` package, v 0.9-38.

483

#### 484 **Replication of BMI-eQTL**

485 We assess replication in two brain tissues using the Common Mind Consortium (CMC)<sup>67</sup>  
486 Dorsolateral prefrontal cortex (DLPFC) from CMC release 4. Quality control for the CMC  
487 datasets mirrored the QC performed for the GTEx data set. One subject with XXY  
488 chromosomes and samples with outlying height, weight, and BMI values were removed from  
489 subsequent analyses. Subjects of European descent were selected for testing replication. We  
490 ran ancestry analyses using the 1000 genomes reference panel and the unsupervised analysis  
491 in the admixture tool<sup>68</sup>. For RNA sequencing, genes with  $\geq 6$  reads in  $\geq 20\%$  of samples are  
492 retained and mapped genes were normalized between samples using edgeR. Outliers were  
493 winsorized and transformed to log2CPM. We applied surrogate variable analysis to the RNA  
494 sequencing data to generate SV's using the "be" method that preserve the effect of BMI and  
495 residualized the expression matrices with the SVs.

496 In contrast to GTEx and WGS data, CMC genetic data is imputed genotype calls to the  
497 HRC platform. For genotype QC, we filtered for imputation quality,  $R_{sq} \geq 0.3$ <sup>69</sup>, removed sex  
498 mismatch, and ran relatedness in plink 1.9, removing a related sample if  $IBD > 0.125$ . In plink2,  
499 we applied missingness flags `-geno 0.01`, `mind 0.01`, and `HWE 1x10-6` and output data in both  
500 dosage and hardcall and tested both for replication. We computed principal components in plink  
501 for later use in the eQTL model as covariates. We called Base-eQTLs and BMI-eQTLs in CMC  
502 according to the same equations as in GTEx. We assessed replication using the  $\pi$  statistic from  
503 the `qvalue` package.

504

#### 505 **Loss of Function Intolerance Enrichment**

506 To test for enrichment of functionally relevant genes in our sets, we obtained the  
507 probability of loss-of-function intolerance (pLI) score from gnomAD/2.1.1<sup>70</sup> for Base-eGenes,  
508 BMI-eGenes, BMI-DE genes. We assessed for enrichment for high pLI (pLI > 0.90) genes in

509 each category compared to the background of genes using a binomial test where  $x$ = number of  
510 eGenes that are high pLI and significant,  $n$ =number of significant genes, and  $p$ = number of high  
511 pLI genes in this tissue/all genes in background of tissue.

512

### 513 **Gene Set Enrichment**

514 To define enriched gene sets in the sets of BMI-dynamic loci identified, we implemented  
515 gene set enrichment using the gprofiler2 package<sup>71</sup> with the 'fdr' correction method and a  
516 custom background set defined as all genes expressed in the tissue of interest. We tested GO,  
517 KEGG, REACTOME and Wikipathways.

518

### 519 **Conditional Analysis**

520 To probe the number of independent signals in each eGene loci we employed stepwise  
521 conditional analysis in R for the Base-eGenes and BMI-eGenes. For each eGene, we generated  
522 a linkage disequilibrium (LD) matrix using the genotype data from the eQTL analysis and the  
523 `cor()` function in R with the pairwise complete observation setting. We identified the top SNP  
524 signal, which is the SNP with the smallest SNP coefficient p-value and all SNPs with  $r > 0.999$   
525 correlation. We added the most significant SNP in the model and re-ran the eQTL model for the  
526 eGene window SNPs. If the SNP coefficient p-value of new most significant SNP in the iteration  
527 was less than 0.001, it was added into the model and a subsequent iteration was ran. The  
528 conditional analysis iterated until the top p-value was  $\geq 0.001$ .

529 For the interaction conditional analysis, we repeated this process except at start of the  
530 conditioning we add the top SNP, the top SNP\*BMI interaction, and BMI into the model. The top  
531 SNP for the iteration model is the SNP with the smallest p-value of the interaction coefficient. At  
532 each iteration if the interaction coefficient p-value is less than 0.001, we add the top SNP and  
533 the top SNP\*BMI terms as covariates.

534 We identified credible sets of Base-eQTL and BMI-eQTL for each eGene by selecting  
535 the top SNPs that were conditionally independent and had an original eQTL p-value that was  
536 locally significant. Each top SNP marks a discrete credible set that also includes SNPs in LD  $r^2$   
537  $> 0.8$ .

538

### 539 **Interaction Directionality Assignment**

540 For the top SNP in each BMI-eQTL credible set we characterized the direction of the  
541 interaction of SNP and BMI into four categories: positive, negative, flipped, and uncertain, using  
542 the categorical BMI models. The full decision tree is available in Supplementary Figure 3.

## 543 **Transcription Factor Binding Site Analysis**

544 To test if BMI-eQTL disrupt specific transcription factors compared to Base-eQTL we  
545 implemented transcription factor binding site (TFBS) affinity analysis using the atSNP package<sup>72</sup>  
546 and the Jaspar2020 motif library. We tested all the variants in each credible set as our TFBS  
547 input, annotated to dbSNP151 and computed the affinity scores using ComputeMotifScore() and  
548 p-values using ComputePValues(). We assessed the significance of the binding affinity change  
549 using an FDR correction of the p-value rank output. We implemented a one-sided binomial test  
550 to determine if there is an enrichment for disruption of TFs in the BMI-eQTL. The expected  
551 probability  $p$  is the number of significant rsIDs in a motif  $X$  in Base-eQTLs/number of rsIDs  
552 tested in motif  $X$  in Base. The trials  $n$  equals the number of rsIDs tested in motif  $X$  in BMI-eQTLs  
553 and the successes  $x$  are the number of FDR-significant rsIDs in motif  $X$  in the BMI-eQTLs. We  
554 implemented an FDR correction to the binomial p-values to correct for the number of motifs  
555 tested.

556

## 557 **Cell type deconvolution**

558 We downloaded single cell data across tissues across studies to deconvolute the GTEx bulk  
559 data with the most BMI-eQTL. Data was available for cortex<sup>73</sup>, nucleus accumbens<sup>74</sup>, small  
560 intestine, transverse colon<sup>75</sup>, and minor salivary gland<sup>76</sup>. We converted all counts data to CPM  
561 and used Cibersortx<sup>77</sup> to construct a signature matrix. We applied that signature matrix to  
562 deconvolute the GTEx bulk tissue and obtain estimated cell type fractions for each GTEx  
563 sample. We tested if cell type was controlled for in the RNA sequencing quality control,  
564 completed with SVA. The estimated cell fractions correlated robustly with surrogate variables  
565 (**Sup Fig 4A**) however because we preserved the effect of BMI in SV creation and found BMI  
566 correlates with cell fraction there may be residual impacts on discovery. Using the cell fraction  
567 and RNA sequencing, we apply Bayesian estimation using bMIND<sup>78</sup> to estimate cell type-  
568 specific gene expression matrices. Of note, when using bMIND only a set number of cell type-  
569 specific matrices can be imputed, so at this step we collapse cell types of the same kind (i.e.  
570 Excitatory neuron population 1 and 2 are collapsed, Supplementary Table). We then repeat our  
571 primary eQTL framework within each cell type to construct cell-type specific eQTL statistics. We  
572 determine a lead cell type for each eQTL denoted by the cell type eQTL with the smallest p-  
573 value. To determine if there is enrichment for specific cell types amongst lead BMI-eQTL, we  
574 completed a binomial test. We tested against the proportion of lead cell type in the Base-eQTL  
575 analysis.

576

## 577 **Activity by contact scoring of Interaction-eQTL with ATAC seq.**

578 We selected Base- and BMI eGenes credible sets significant in excitatory neurons from  
579 deconvolution. We use adapted activity-by-contact (ABC) model using STARE<sup>36</sup> to score  
580 relative regulatory activity of the eQTL in the interaction terms using the R package. The ABC  
581 score is calculated using by integrating “activity”, which here is defined by  $-\log_{10}(\text{p-value})$  of the  
582 SNP\*BMI interaction coefficient and “contact” which we define using ATAC-sequencing in  
583 glutamatergic iPSC neurons along with the distance to eGenes to determine predicted  
584 regulatory activity of a SNP toward a specific gene. We assess a baseline contact of ATACseq  
585 peaks with no inflammatory markers applied and ATACseq in the context of IL-6, TNF-alpha,  
586 and interferon-a. The methods of cell culture can are cited elsewhere<sup>35</sup>. We visualized the  
587 distribution of ATAC seq scores across contexts and consulted the literature<sup>79</sup>, and chose to set  
588 a threshold requiring the absolute value of the ABC score difference between vehicle and  
589 context  $> 0.02$  and ABC score in either vehicle or the context to be  $> 0.1$ .

590

## 591 **Creation of BMI-dynamic predictor models**

592 To predict gene expression from SNPs, BMI and SNP\*BMI interactions, we use the  
593 `cv.glinternet()` from the `glinternet` R package<sup>80</sup>. Glinternet employs a Hierarchical Group-Lasso  
594 Regularization to select predictive features. The software is intended to learn interactions, and if  
595 an interaction coefficient is non-zero then both main effects are included with a non-zero  
596 coefficient. We employ a four-fold approach whereby we train the models using a three-fold  
597 cross validation and hold out the fourth fold for within-sample validation. We ensured the hold  
598 out validation fold has an even distribution of BMI using `StratifiedKFold` from the `sklearn`  
599 package in `python3.7.3`. We treat SNP as a continuous measure, so models can be applied to  
600 dosage data. We used the same genotype QC steps described in the eQTL set with a MAF  
601 threshold to 5%, which demonstrated reduced overfitting than 1%. For BMI-Interaction model to  
602 be significant the cross-fold  $R^2 > 0.1$  and  $p < 0.05$ . Additionally, in the hold-out fold the predicted  
603 values must significantly predict the observed values ( $p\text{-holdout} < 0.05$ ).

604 We tested if the crossfold- $R^2$  significant predicts the 4<sup>th</sup> fold hold out  $R^2$  in each tissue  
605 (**Sup Fig 5 C-H**), and found a significant prediction across tissues test with  $R^2$  ranging from  
606 .314-.765. We find that sample size is vital to learning interactions. In tissues with larger sample  
607 sizes, the CV- $R^2$  better predicts the holt out validation  $R^2$ . We also see the association between  
608 CV- $R^2$  and hold out  $R^2$  is similar across models that contain just main effects as well as  
609 interaction. In smaller tissues, we find that models with interactions have worse association,  
610 indicating sample size is paramount in fitting and validating interaction predictor models.

611 We compare our interaction-aware models to the published GTEx v8 predictor models  
612 on PredictDB<sup>81</sup>, which use Predixcan<sup>37</sup> to predict expression. The published models use elastic  
613 net and which account for only the main effects of SNPs using a 1% MAF threshold and have  
614 other analysis-specific differences in QC such as PEER versus SVA for latent factor correction.  
615 The models made with elastic net in general include more predictors in each model (**Sup Fig**  
616 **5A**), which may be due to a more lenient MAF filter or features of the differing ML learning  
617 approaches.

618

### 619 **BMI-dynamic predictor model application to UK Biobank**

620 The UK Biobank is a cohort of ~500,000 individuals from the United Kingdom with  
621 genotype, lifestyle, health, and anthropometric data. For the UK biobank genotype quality  
622 control, we implemented an INFO > 0.8 threshold and filtered relatedness > 0.0625 and subset  
623 to European individuals as that is the population used in the published predixcan models. We  
624 selected depression and current smoking as psychiatric traits due to epidemiologic associations  
625 with BMI<sup>21,82</sup>, the availability of case status and BMI at UKB assessment center visits, and the  
626 large sample sizes. To obtain depression case status, we used data field 20002, which is  
627 medical history obtained from verbal interview at the assessment center. For current smoking  
628 status, we used the lifestyle questionnaire data field 1239 “Current tobacco smoking”, from the  
629 touchscreen questionnaire at the assessment center. BMI values were obtained from data field  
630 21001 from the assessment center physical measures.

631 To calculate predicted expression using the PredictDB models, called GREx, we used  
632 the predixcan python package and the elastic net v8 GTEx PredictDB predictor models. To  
633 calculate predicted expression for the BMI-interaction glinternet models, we manually multiply  
634 each predictor by the beta coefficient output by glinternet in R. The glinternet package scales  
635 the input predictors while building the model but returns the unscaled coefficients.

636 Once predicted expression is calculated, we test the association with psychiatric  
637 phenotype using a logistic regression in R using glm() with family = “binomial”. For the trait  
638 association analyses we used age, sex, BMI, and PC1-10 as covariates in the predixcan  
639 PredictDB models and age, sex, PC1-10 as covariates in the BMI-Interaction model.

640 We tested across GWAS traits<sup>83,84,85,86,87,88,89,90,91,92,93,94,95,96,97,98</sup> for evidence of nominal  
641 trait association in the identified genes using S-Predixcan<sup>99</sup>. For the 2023 major depressive  
642 disorder GWAS, we tested for enrichment of the UK biobank associations in nominal S-  
643 predixcan associations using a binomial test.

644

645 **Acknowledgements**

646 LMH acknowledges funding from NIMH (R01MH124839, R01MH118278, R01MH125938,  
647 RM1MH132648, R01MH136149), NIEHS (R01ES033630), and the Department of Defense  
648 (TP220451).

649  
650 This work was supported in part through the computational and data resources and staff  
651 expertise provided by Scientific Computing and Data at the Icahn School of Medicine at  
652 Mount Sinai and supported by the Clinical and Translational Science Awards (CTSA)  
653 grant UL1TR004419 from the National Center for Advancing Translational Sciences.  
654 Research reported in this publication was also supported by the Office of Research  
655 Infrastructure of the National Institutes of Health under award number S10OD026880  
656 and S10OD030463. The content is solely the responsibility of the authors and does not  
657 necessarily represent the official views of the National Institutes of Health.

658

659 **References**

660

- 661 1. Reza, N., Alford, R. L., Belmont, J. W. & Marston, N. The Expansion of Genetic Testing in  
662 Cardiovascular Medicine: Preparing the Cardiology Community for the Changing Landscape.  
663 *Curr. Cardiol. Rep.* **26**, 135–146 (2024).
- 664 2. Dratch, L. *et al.* Genetic testing in adults with neurologic disorders: indications, approach,  
665 and clinical impacts. *J. Neurol.* **271**, 733–747 (2024).
- 666 3. Hingorani, A. D. *et al.* Performance of polygenic risk scores in screening, prediction, and risk  
667 stratification: secondary analysis of data in the Polygenic Score Catalog. *BMJ Med.* **2**,  
668 e000554 (2023).
- 669 4. Johansson, Å. *et al.* Precision medicine in complex diseases-Molecular subgrouping for  
670 improved prediction and treatment stratification. *J. Intern. Med.* **294**, 378–396 (2023).
- 671 5. Gibson, G. Population genetics and GWAS: A primer. *PLoS Biol.* **16**, e2005485 (2018).

- 672 6. Shi, C. *et al.* Multifactorial Diseases of the Heart, Kidneys, Lungs, and Liver and Incident  
673 Cancer: Epidemiology and Shared Mechanisms. *Cancers* **15**, 729 (2023).
- 674 7. Marigorta, U. M. & Gibson, G. A simulation study of gene-by-environment interactions in  
675 GWAS implies ample hidden effects. *Front. Genet.* **5**, 225 (2014).
- 676 8. Nicolae, D. L. *et al.* Trait-associated SNPs are more likely to be eQTLs: annotation to enhance  
677 discovery from GWAS. *PLoS Genet.* **6**, e1000888 (2010).
- 678 9. Moore, S. R. *et al.* Sex differences in the genetic regulation of the blood transcriptome  
679 response to glucocorticoid receptor activation. *Transl. Psychiatry* **11**, 632 (2021).
- 680 10. Ota, M. *et al.* Dynamic landscape of immune cell-specific gene regulation in immune-  
681 mediated diseases. *Cell* **184**, 3006-3021.e17 (2021).
- 682 11. Nathan, A. *et al.* Single-cell eQTL models reveal dynamic T cell state dependence of  
683 disease loci. *Nature* **606**, 120–128 (2022).
- 684 12. Wingo, A. P. *et al.* Sex differences in brain protein expression and disease. *Nat. Med.* **29**,  
685 2224–2232 (2023).
- 686 13. Benjamin, K. J. M. *et al.* Sex affects transcriptional associations with schizophrenia  
687 across the dorsolateral prefrontal cortex, hippocampus, and caudate nucleus. *Nat. Commun.*  
688 **15**, 3980 (2024).
- 689 14. O’Brien, H. E. *et al.* Expression quantitative trait loci in the developing human brain and  
690 their enrichment in neuropsychiatric disorders. *Genome Biol.* **19**, 194 (2018).
- 691 15. NCD Risk Factor Collaboration (NCD-RisC). Trends in adult body-mass index in 200  
692 countries from 1975 to 2014: a pooled analysis of 1698 population-based measurement  
693 studies with 19·2 million participants. *Lancet Lond. Engl.* **387**, 1377–1396 (2016).



- 694 16. Ellulu, M. S., Patimah, I., Khaza'ai, H., Rahmat, A. & Abed, Y. Obesity and inflammation:  
695 the linking mechanism and the complications. *Arch. Med. Sci. AMS* **13**, 851–863 (2017).
- 696 17. Rask, E. *et al.* Tissue-specific dysregulation of cortisol metabolism in human obesity. *J.*  
697 *Clin. Endocrinol. Metab.* **86**, 1418–1421 (2001).
- 698 18. Matsuda, M. & Shimomura, I. Increased oxidative stress in obesity: implications for  
699 metabolic syndrome, diabetes, hypertension, dyslipidemia, atherosclerosis, and cancer.  
700 *Obes. Res. Clin. Pract.* **7**, e330-341 (2013).
- 701 19. Recalde, M. *et al.* Body mass index and waist circumference in relation to the risk of 26  
702 types of cancer: a prospective cohort study of 3.5 million adults in Spain. *BMC Med.* **19**, 10  
703 (2021).
- 704 20. Dobner, J. & Kaser, S. Body mass index and the risk of infection - from underweight to  
705 obesity. *Clin. Microbiol. Infect. Off. Publ. Eur. Soc. Clin. Microbiol. Infect. Dis.* **24**, 24–28  
706 (2018).
- 707 21. Simon, G. E. *et al.* Association between obesity and psychiatric disorders in the US adult  
708 population. *Arch. Gen. Psychiatry* **63**, 824–830 (2006).
- 709 22. Cross-Disorder Group of the Psychiatric Genomics Consortium. Electronic address:  
710 plee0@mgh.harvard.edu & Cross-Disorder Group of the Psychiatric Genomics Consortium.  
711 Genomic Relationships, Novel Loci, and Pleiotropic Mechanisms across Eight Psychiatric  
712 Disorders. *Cell* **179**, 1469-1482.e11 (2019).
- 713 23. Zhang, H. *et al.* Genome-wide association study identifies 32 novel breast cancer  
714 susceptibility loci from overall and subtype-specific analyses. *Nat. Genet.* **52**, 572–581 (2020).

- 715 24. Shu, L., Blencowe, M. & Yang, X. Translating GWAS Findings to Novel Therapeutic  
716 Targets for Coronary Artery Disease. *Front. Cardiovasc. Med.* **5**, 56 (2018).
- 717 25. Kasela, S. *et al.* Interaction molecular QTL mapping discovers cellular and environmental  
718 modifiers of genetic regulatory effects. *Am. J. Hum. Genet.* **111**, 133–149 (2024).
- 719 26. GTEx Consortium. The GTEx Consortium atlas of genetic regulatory effects across human  
720 tissues. *Science* **369**, 1318–1330 (2020).
- 721 27. Obradovic, M. *et al.* Leptin and Obesity: Role and Clinical Implication. *Front. Endocrinol.*  
722 **12**, 585887 (2021).
- 723 28. Wu, P. *et al.* Comprehensive analysis of epigenomics and transcriptome data to identify  
724 potential target genes associated with obesity. *Front. Genet.* **13**, 1024300 (2022).
- 725 29. He, H. *et al.* A Systems Genetics Approach Identified GPD1L and its Molecular  
726 Mechanism for Obesity in Human Adipose Tissue. *Sci. Rep.* **7**, 1799 (2017).
- 727 30. Mostafavi, H., Spence, J. P., Naqvi, S. & Pritchard, J. K. Systematic differences in  
728 discovery of genetic effects on gene expression and complex traits. *Nat. Genet.* **55**, 1866–  
729 1875 (2023).
- 730 31. Brotman, S. M. *et al.* Cell-Type Composition Affects Adipose Gene Expression  
731 Associations With Cardiometabolic Traits. *Diabetes* **72**, 1707–1718 (2023).
- 732 32. Salas-Venegas, V. *et al.* The Obese Brain: Mechanisms of Systemic and Local  
733 Inflammation, and Interventions to Reverse the Cognitive Deficit. *Front. Integr. Neurosci.* **16**,  
734 798995 (2022).
- 735 33. Wang, W.-Y., Tan, M.-S., Yu, J.-T. & Tan, L. Role of pro-inflammatory cytokines released  
736 from microglia in Alzheimer's disease. *Ann. Transl. Med.* **3**, 136 (2015).

- 737 34. West, P. K. *et al.* The cytokines interleukin-6 and interferon- $\alpha$  induce distinct microglia  
738 phenotypes. *J. Neuroinflammation* **19**, 96 (2022).
- 739 35. Retallick-Townsley, K. G. *et al.* Dynamic stress- and inflammatory-based regulation of  
740 psychiatric risk loci in human neurons. *bioRxiv* 2024.07.09.602755 (2024)  
741 doi:10.1101/2024.07.09.602755.
- 742 36. Hecker, D., Behjati Ardakani, F., Karollus, A., Gagneur, J. & Schulz, M. H. The adapted  
743 Activity-By-Contact model for enhancer-gene assignment and its application to single-cell  
744 data. *Bioinforma. Oxf. Engl.* **39**, btad062 (2023).
- 745 37. Gamazon, E. R. *et al.* A gene-based association method for mapping traits using  
746 reference transcriptome data. *Nat. Genet.* **47**, 1091–1098 (2015).
- 747 38. Berrington de Gonzalez, A. *et al.* Body-mass index and mortality among 1.46 million  
748 white adults. *N. Engl. J. Med.* **363**, 2211–2219 (2010).
- 749 39. Karlsson, I. K., Lehto, K., Gatz, M., Reynolds, C. A. & Dahl Aslan, A. K. Age-dependent  
750 effects of body mass index across the adult life span on the risk of dementia: a cohort study  
751 with a genetic approach. *BMC Med.* **18**, 131 (2020).
- 752 40. Hübel, C. *et al.* Genetic correlations of psychiatric traits with body composition and  
753 glycemic traits are sex- and age-dependent. *Nat. Commun.* **10**, 5765 (2019).
- 754 41. Glastonbury, C. A., Couto Alves, A., El-Sayed Moustafa, J. S. & Small, K. S. Cell-Type  
755 Heterogeneity in Adipose Tissue Is Associated with Complex Traits and Reveals Disease-  
756 Relevant Cell-Specific eQTLs. *Am. J. Hum. Genet.* **104**, 1013–1024 (2019).
- 757 42. Gómez-Apo, E., Mondragón-Maya, A., Ferrari-Díaz, M. & Silva-Pereyra, J. Structural  
758 Brain Changes Associated with Overweight and Obesity. *J. Obes.* **2021**, 6613385 (2021).

- 759 43. Milanova, I. V., Correa-da-Silva, F., Kalsbeek, A. & Yi, C.-X. Mapping of Microglial Brain  
760 Region, Sex and Age Heterogeneity in Obesity. *Int. J. Mol. Sci.* **22**, 3141 (2021).
- 761 44. Liu, B. *et al.* Molecular consequences of activated microglia in the brain: overactivation  
762 induces apoptosis. *J. Neurochem.* **77**, 182–189 (2001).
- 763 45. Schmidt, F. M. *et al.* Inflammatory cytokines in general and central obesity and  
764 modulating effects of physical activity. *PLoS One* **10**, e0121971 (2015).
- 765 46. Lumeng, C. N., Bodzin, J. L. & Saltiel, A. R. Obesity induces a phenotypic switch in  
766 adipose tissue macrophage polarization. *J. Clin. Invest.* **117**, 175–184 (2007).
- 767 47. Mai, J., Virtue, A., Shen, J., Wang, H. & Yang, X.-F. An evolving new paradigm:  
768 endothelial cells--conditional innate immune cells. *J. Hematol. Oncol. J Hematol Oncol* **6**, 61  
769 (2013).
- 770 48. Kumar, M. *et al.* Reduced immune cell infiltration and increased pro-inflammatory  
771 mediators in the brain of Type 2 diabetic mouse model infected with West Nile virus. *J.*  
772 *Neuroinflammation* **11**, 80 (2014).
- 773 49. Carraro, R. S. *et al.* Hypothalamic mitochondrial abnormalities occur downstream of  
774 inflammation in diet-induced obesity. *Mol. Cell. Endocrinol.* **460**, 238–245 (2018).
- 775 50. André, C. *et al.* Inhibiting Microglia Expansion Prevents Diet-Induced Hypothalamic and  
776 Peripheral Inflammation. *Diabetes* **66**, 908–919 (2017).
- 777 51. Léon, S., Nadjar, A. & Quarta, C. Microglia-Neuron Crosstalk in Obesity: Melodious  
778 Interaction or Kiss of Death? *Int. J. Mol. Sci.* **22**, 5243 (2021).

- 779 52. Tan, P.-H., Ji, J., Hsing, C.-H., Tan, R. & Ji, R.-R. Emerging Roles of Type-I Interferons in  
780 Neuroinflammation, Neurological Diseases, and Long-Haul COVID. *Int. J. Mol. Sci.* **23**, 14394  
781 (2022).
- 782 53. Taylor, D. J. *et al.* Sources of gene expression variation in a globally diverse human  
783 cohort. *Nature* **632**, 122–130 (2024).
- 784 54. Kozlova, A. A. *et al.* Knock-out of the critical nitric oxide synthase regulator DDAH1 in  
785 mice impacts amphetamine sensitivity and dopamine metabolism. *J. Neural Transm. Vienna*  
786 *Austria 1996* **130**, 1097–1112 (2023).
- 787 55. Varol Tas, F., Guvenir, T., Tas, G., Cakaloz, B. & Ormen, M. Nitric oxide levels in  
788 disruptive behavioral disorder. *Neuropsychobiology* **53**, 176–180 (2006).
- 789 56. Kudlow, P., Cha, D. S., Carvalho, A. F. & McIntyre, R. S. Nitric Oxide and Major  
790 Depressive Disorder: Pathophysiology and Treatment Implications. *Curr. Mol. Med.* **16**, 206–  
791 215 (2016).
- 792 57. Wang, D., An, S. C. & Zhang, X. Prevention of chronic stress-induced depression-like  
793 behavior by inducible nitric oxide inhibitor. *Neurosci. Lett.* **433**, 59–64 (2008).
- 794 58. Singh, S. & Kamat, S. S. The loss of enzymatic activity of the PHARC-associated lipase  
795 ABHD12 results in increased phagocytosis that causes neuroinflammation. *Eur. J. Neurosci.*  
796 **54**, 7442–7457 (2021).
- 797 59. Kranjac, A. W. & Kranjac, D. Explaining adult obesity, severe obesity, and BMI: Five  
798 decades of change. *Heliyon* **9**, e16210 (2023).

- 799 60. Robinson, M. D., McCarthy, D. J. & Smyth, G. K. edgeR: a Bioconductor package for  
800 differential expression analysis of digital gene expression data. *Bioinforma. Oxf. Engl.* **26**,  
801 139–140 (2010).
- 802 61. Ritchie, M. E. *et al.* limma powers differential expression analyses for RNA-sequencing  
803 and microarray studies. *Nucleic Acids Res.* **43**, e47 (2015).
- 804 62. Leek, J. T., Johnson, W. E., Parker, H. S., Jaffe, A. E. & Storey, J. D. The sva package for  
805 removing batch effects and other unwanted variation in high-throughput experiments.  
806 *Bioinforma. Oxf. Engl.* **28**, 882–883 (2012).
- 807 63. Chang, C. C. *et al.* Second-generation PLINK: rising to the challenge of larger and richer  
808 datasets. *GigaScience* **4**, 7 (2015).
- 809 64. Shabalin, A. A. Matrix eQTL: ultra fast eQTL analysis via large matrix operations.  
810 *Bioinforma. Oxf. Engl.* **28**, 1353–1358 (2012).
- 811 65. Huang, Q. Q., Ritchie, S. C., Brozynska, M. & Inouye, M. Power, false discovery rate and  
812 Winner’s Curse in eQTL studies. *Nucleic Acids Res.* **46**, e133 (2018).
- 813 66. Davis, J. R. *et al.* An Efficient Multiple-Testing Adjustment for eQTL Studies that  
814 Accounts for Linkage Disequilibrium between Variants. *Am. J. Hum. Genet.* **98**, 216–224  
815 (2016).
- 816 67. Hoffman, G. E. *et al.* CommonMind Consortium provides transcriptomic and epigenomic  
817 data for Schizophrenia and Bipolar Disorder. *Sci. Data* **6**, 180 (2019).
- 818 68. Alexander, D. H., Novembre, J. & Lange, K. Fast model-based estimation of ancestry in  
819 unrelated individuals. *Genome Res.* **19**, 1655–1664 (2009).

- 820 69. Li, Y., Willer, C. J., Ding, J., Scheet, P. & Abecasis, G. R. MaCH: using sequence and  
821 genotype data to estimate haplotypes and unobserved genotypes. *Genet. Epidemiol.* **34**,  
822 816–834 (2010).
- 823 70. Karczewski, K. J. *et al.* The mutational constraint spectrum quantified from variation in  
824 141,456 humans. *Nature* **581**, 434–443 (2020).
- 825 71. Kolberg, L., Raudvere, U., Kuzmin, I., Vilo, J. & Peterson, H. gprofiler2 -- an R package for  
826 gene list functional enrichment analysis and namespace conversion toolset g:Profiler.  
827 *F1000Research* **9**, ELIXIR-709 (2020).
- 828 72. Zuo, C., Shin, S. & Keleş, S. atSNP: transcription factor binding affinity testing for  
829 regulatory SNP detection. *Bioinforma. Oxf. Engl.* **31**, 3353–3355 (2015).
- 830 73. Lake, B. B. *et al.* Integrative single-cell analysis of transcriptional and epigenetic states in  
831 the human adult brain. *Nat. Biotechnol.* **36**, 70–80 (2018).
- 832 74. Tran, M. N. *et al.* Single-nucleus transcriptome analysis reveals cell-type-specific  
833 molecular signatures across reward circuitry in the human brain. *Neuron* **109**, 3088-3103.e5  
834 (2021).
- 835 75. Elmentaite, R. *et al.* Cells of the human intestinal tract mapped across space and time.  
836 *Nature* **597**, 250–255 (2021).
- 837 76. Huang, N. *et al.* SARS-CoV-2 infection of the oral cavity and saliva. *Nat. Med.* **27**, 892–  
838 903 (2021).
- 839 77. Newman, A. M. *et al.* Determining cell type abundance and expression from bulk tissues  
840 with digital cytometry. *Nat. Biotechnol.* **37**, 773–782 (2019).



- 841 78. Wang, J., Roeder, K. & Devlin, B. Bayesian estimation of cell type-specific gene  
842 expression with prior derived from single-cell data. *Genome Res.* **31**, 1807–1818 (2021).
- 843 79. Nasser, J. *et al.* Genome-wide enhancer maps link risk variants to disease genes. *Nature*  
844 **593**, 238–243 (2021).
- 845 80. Lim, M. & Hastie, T. Learning interactions via hierarchical group-lasso regularization. *J.*  
846 *Comput. Graph. Stat. Jt. Publ. Am. Stat. Assoc. Inst. Math. Stat. Interface Found. N. Am.* **24**,  
847 627–654 (2015).
- 848 81. Barbeira, A. N. *et al.* Exploiting the GTEx resources to decipher the mechanisms at GWAS  
849 loci. *Genome Biol.* **22**, 49 (2021).
- 850 82. Wolters, I., Kastaun, S. & Kotz, D. Associations between body mass index and smoking  
851 behaviour: A cross-sectional study of the German adult population. *Physiol. Behav.* **275**,  
852 114436 (2024).
- 853 83. Watson, H. J. *et al.* Genome-wide association study identifies eight risk loci and  
854 implicates metabo-psychiatric origins for anorexia nervosa. *Nat. Genet.* **51**, 1207–1214  
855 (2019).
- 856 84. Meng, X. *et al.* Multi-ancestry genome-wide association study of major depression aids  
857 locus discovery, fine mapping, gene prioritization and causal inference. *Nat. Genet.* **56**, 222–  
858 233 (2024).
- 859 85. van Rheenen, W. *et al.* Common and rare variant association analyses in amyotrophic  
860 lateral sclerosis identify 15 risk loci with distinct genetic architectures and neuron-specific  
861 biology. *Nat. Genet.* **53**, 1636–1648 (2021).

- 862 86. Mullins, N. *et al.* Genome-wide association study of more than 40,000 bipolar disorder  
863 cases provides new insights into the underlying biology. *Nat. Genet.* **53**, 817–829 (2021).
- 864 87. Demontis, D. *et al.* Discovery of the first genome-wide significant risk loci for attention  
865 deficit/hyperactivity disorder. *Nat. Genet.* **51**, 63–75 (2019).
- 866 88. Yengo, L. *et al.* Meta-analysis of genome-wide association studies for height and body  
867 mass index in ~700000 individuals of European ancestry. *Hum. Mol. Genet.* **27**, 3641–3649  
868 (2018).
- 869 89. Xu, K. *et al.* Genome-wide association study of smoking trajectory and meta-analysis of  
870 smoking status in 842,000 individuals. *Nat. Commun.* **11**, 5302 (2020).
- 871 90. Mahajan, A. *et al.* Multi-ancestry genetic study of type 2 diabetes highlights the power  
872 of diverse populations for discovery and translation. *Nat. Genet.* **54**, 560–572 (2022).
- 873 91. Yu, D. *et al.* Interrogating the Genetic Determinants of Tourette’s Syndrome and Other  
874 Tic Disorders Through Genome-Wide Association Studies. *Am. J. Psychiatry* **176**, 217–227  
875 (2019).
- 876 92. Wightman, D. P. *et al.* A genome-wide association study with 1,126,563 individuals  
877 identifies new risk loci for Alzheimer’s disease. *Nat. Genet.* **53**, 1276–1282 (2021).
- 878 93. Yengo, L. *et al.* A saturated map of common genetic variants associated with human  
879 height. *Nature* **610**, 704–712 (2022).
- 880 94. Tsuo, K. *et al.* Multi-ancestry meta-analysis of asthma identifies novel associations and  
881 highlights the value of increased power and diversity. *Cell Genomics* **2**, 100212 (2022).

- 882 95. Day, F. R. *et al.* Genomic analyses identify hundreds of variants associated with age at  
883 menarche and support a role for puberty timing in cancer risk. *Nat. Genet.* **49**, 834–841  
884 (2017).
- 885 96. Chiou, J. *et al.* Interpreting type 1 diabetes risk with genetics and single-cell  
886 epigenomics. *Nature* **594**, 398–402 (2021).
- 887 97. Grove, J. *et al.* Identification of common genetic risk variants for autism spectrum  
888 disorder. *Nat. Genet.* **51**, 431–444 (2019).
- 889 98. Zhang, L. *et al.* Joint Genome-Wide Association Analyses Identified 49 Novel Loci For Age  
890 at Natural Menopause. *J. Clin. Endocrinol. Metab.* **106**, 2574–2591 (2021).
- 891 99. Barbeira, A. N. *et al.* Exploring the phenotypic consequences of tissue specific gene  
892 expression variation inferred from GWAS summary statistics. *Nat. Commun.* **9**, 1825 (2018).  
893

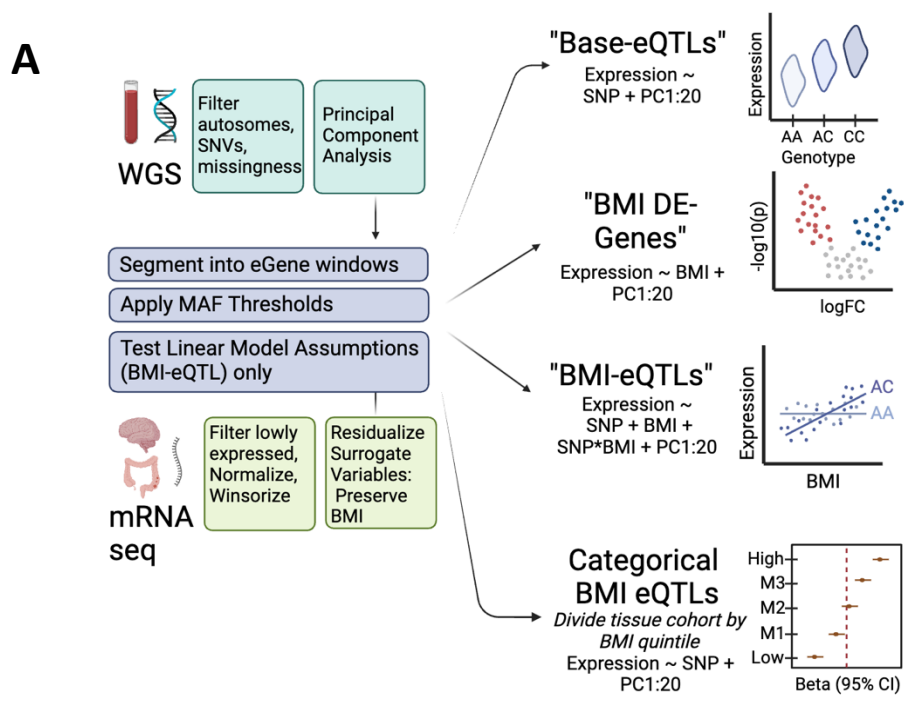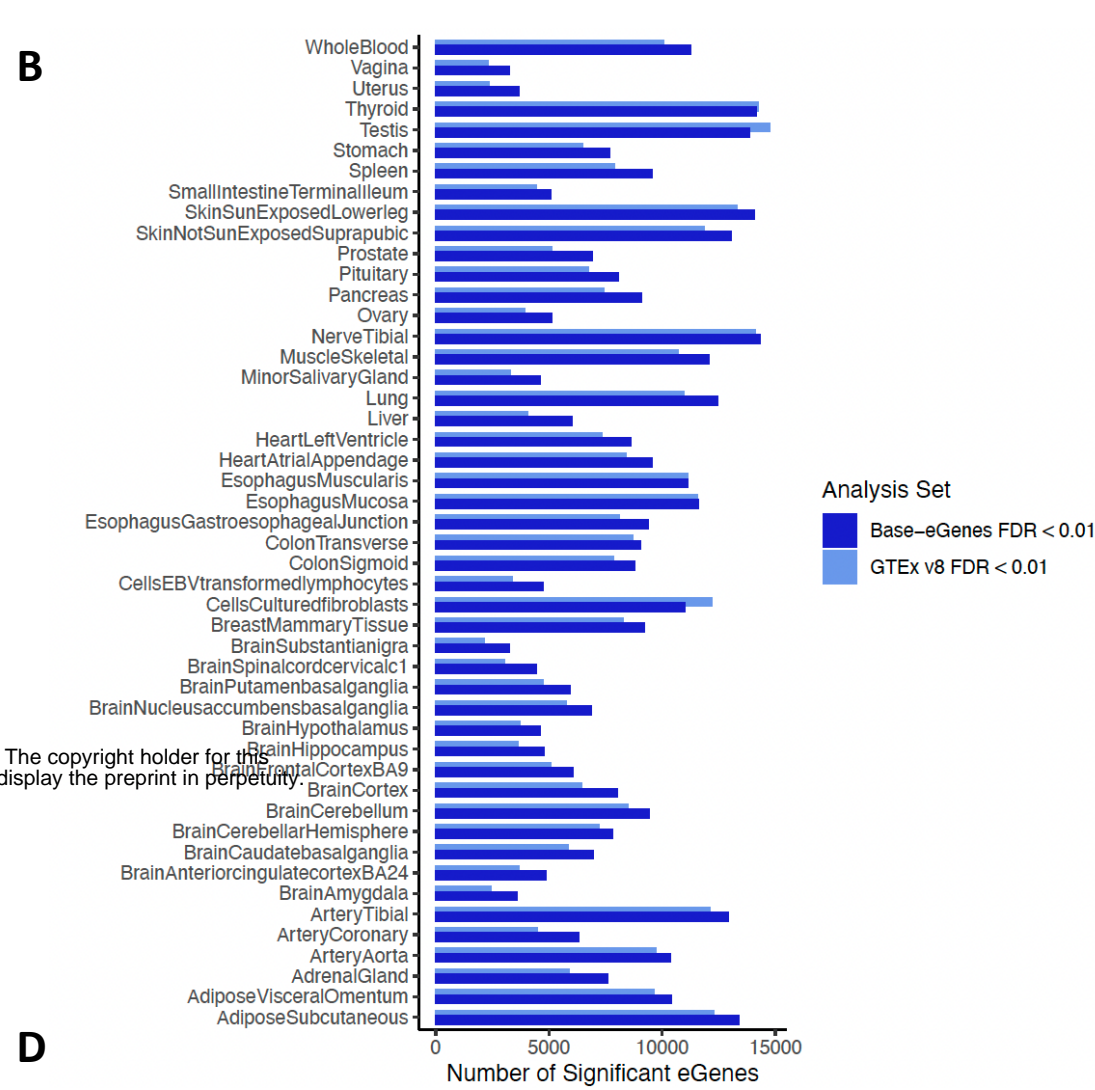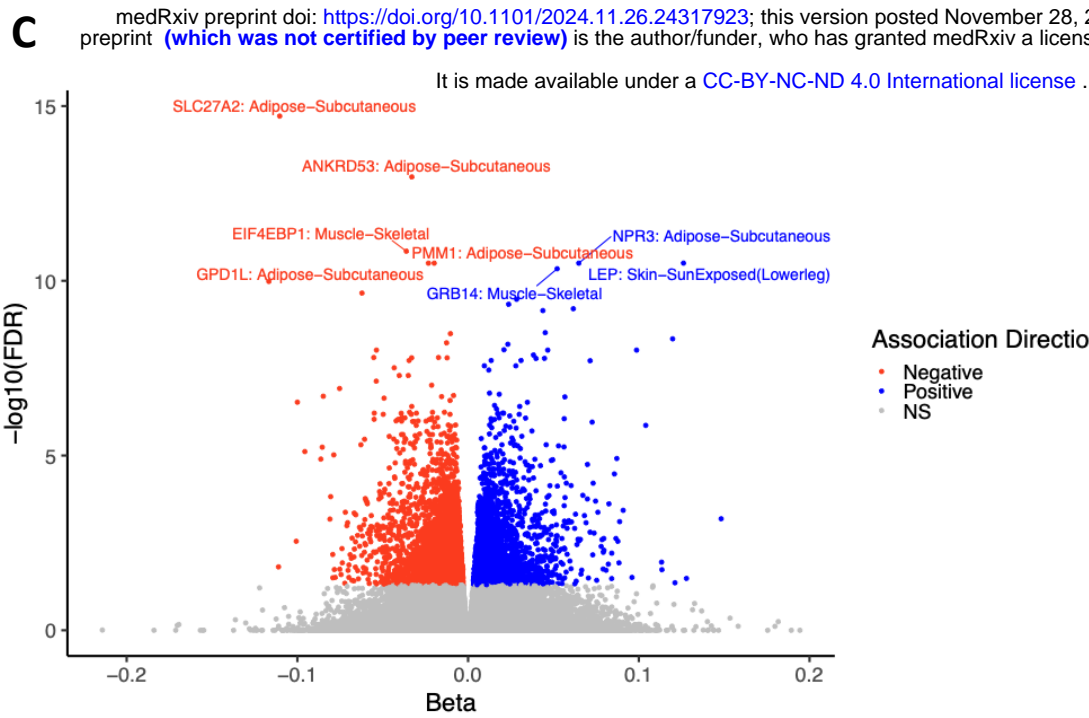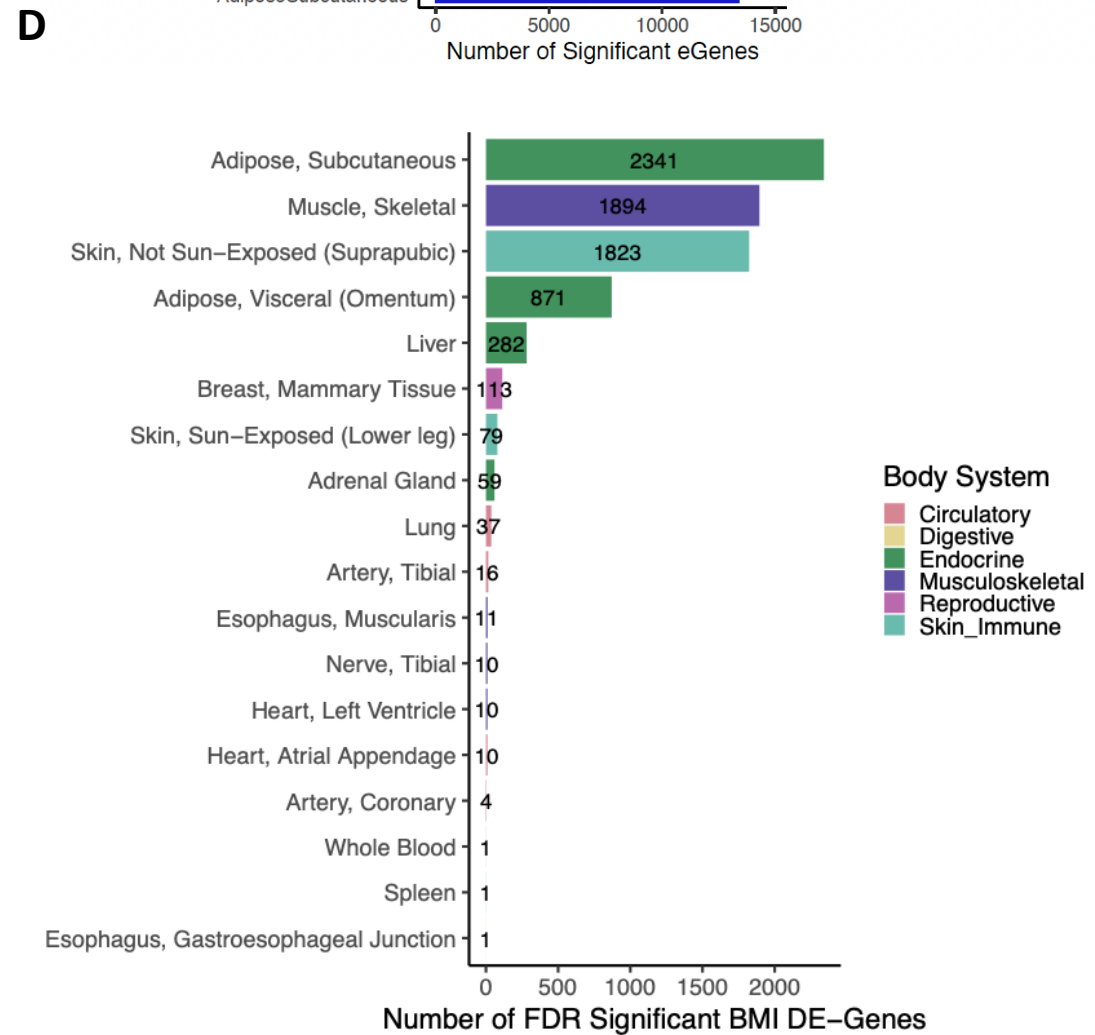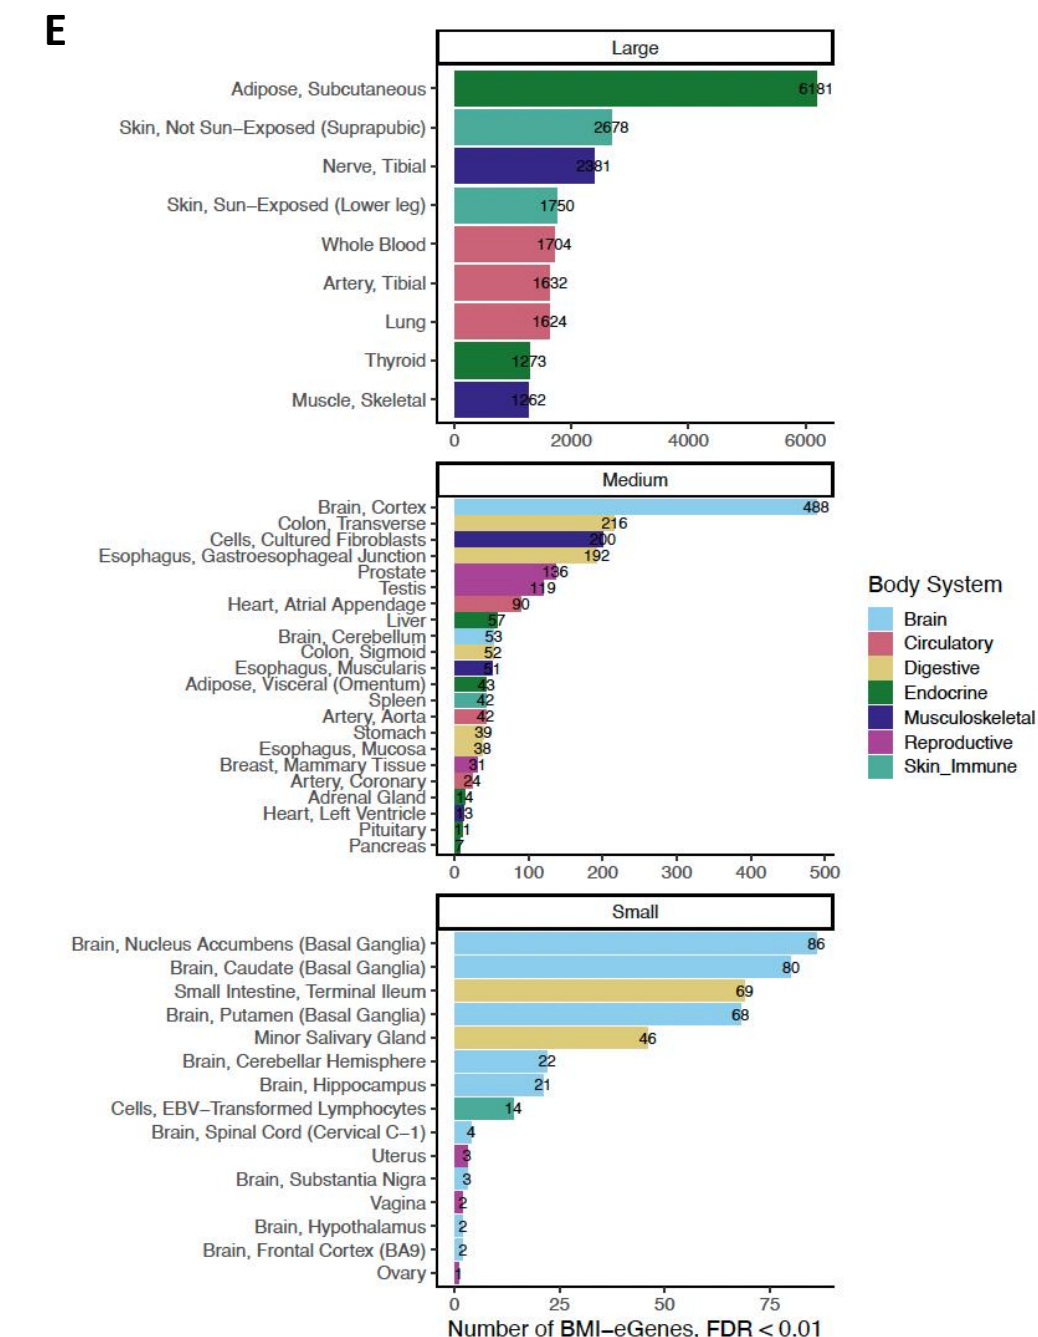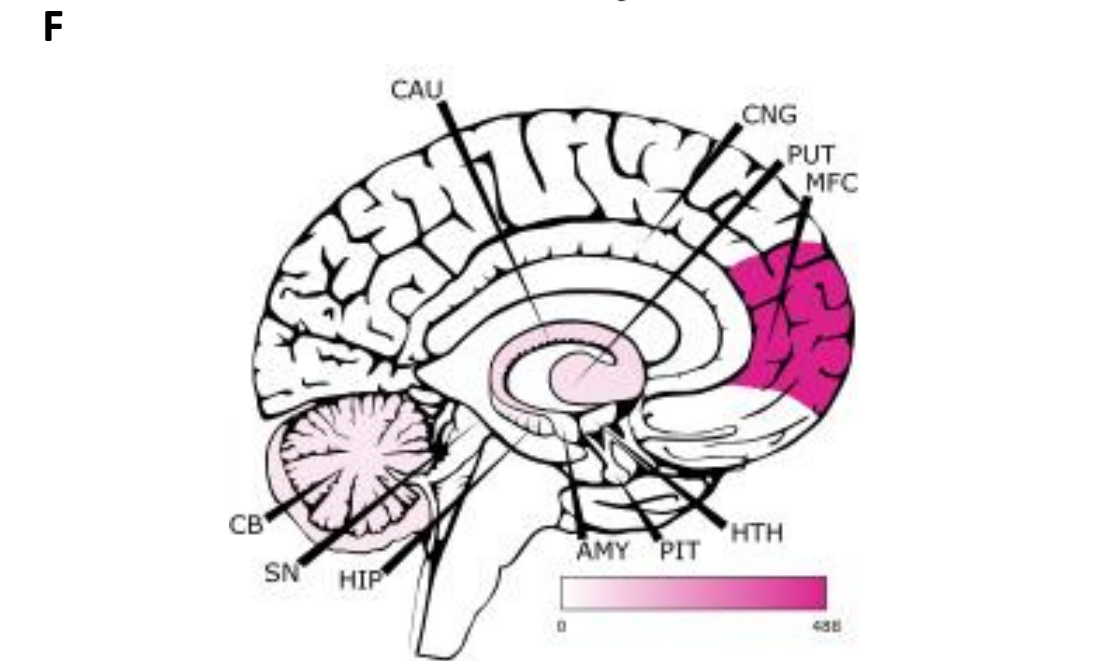

**A**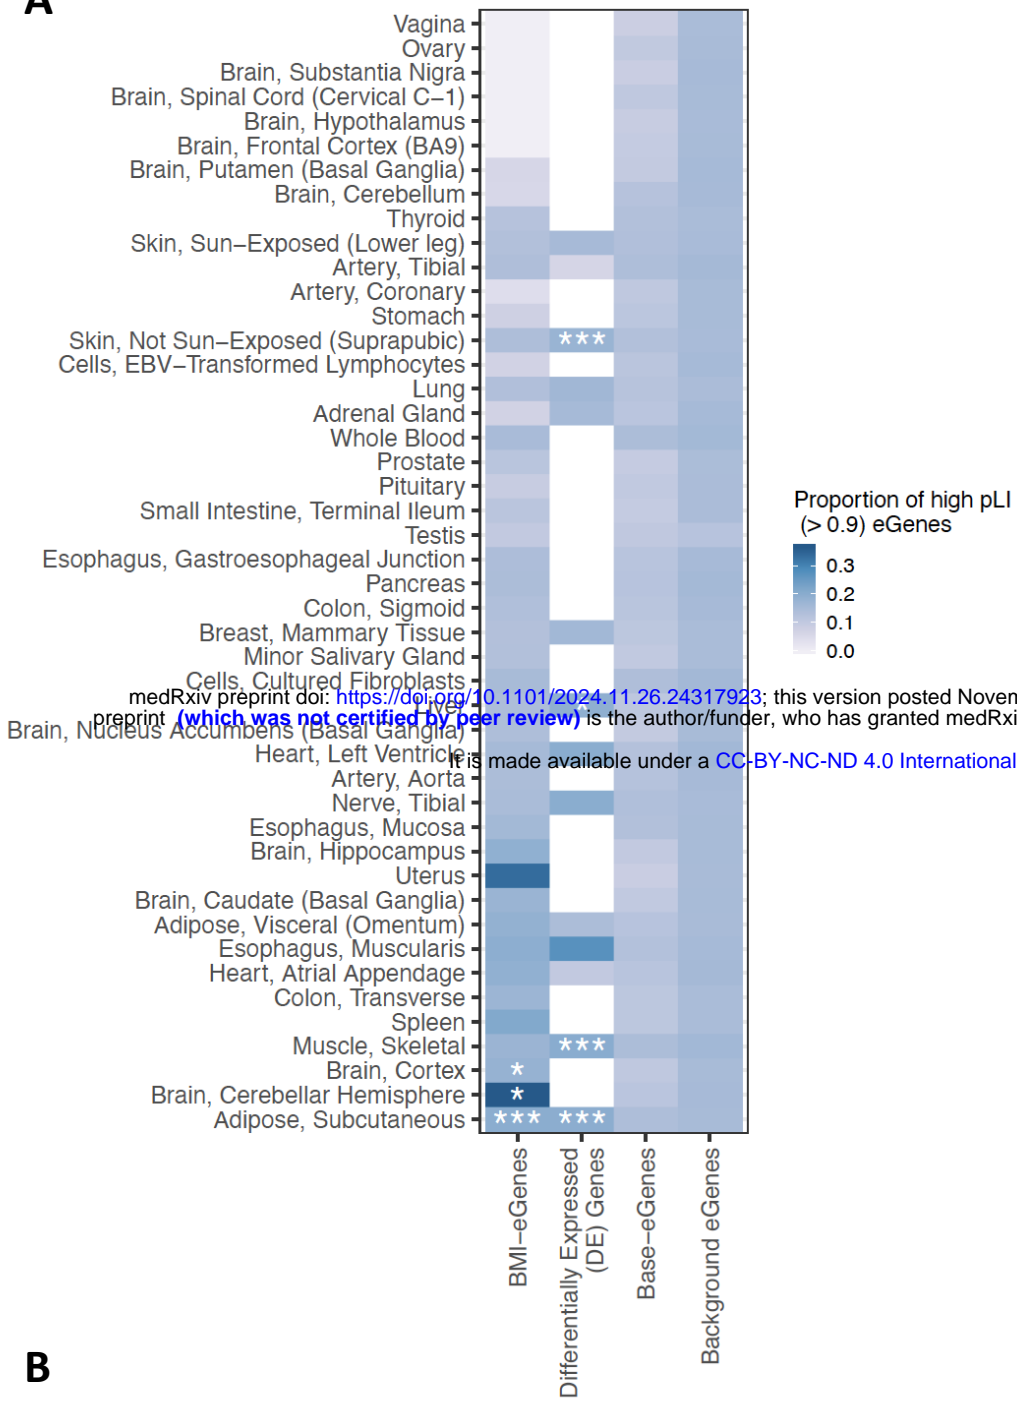**B**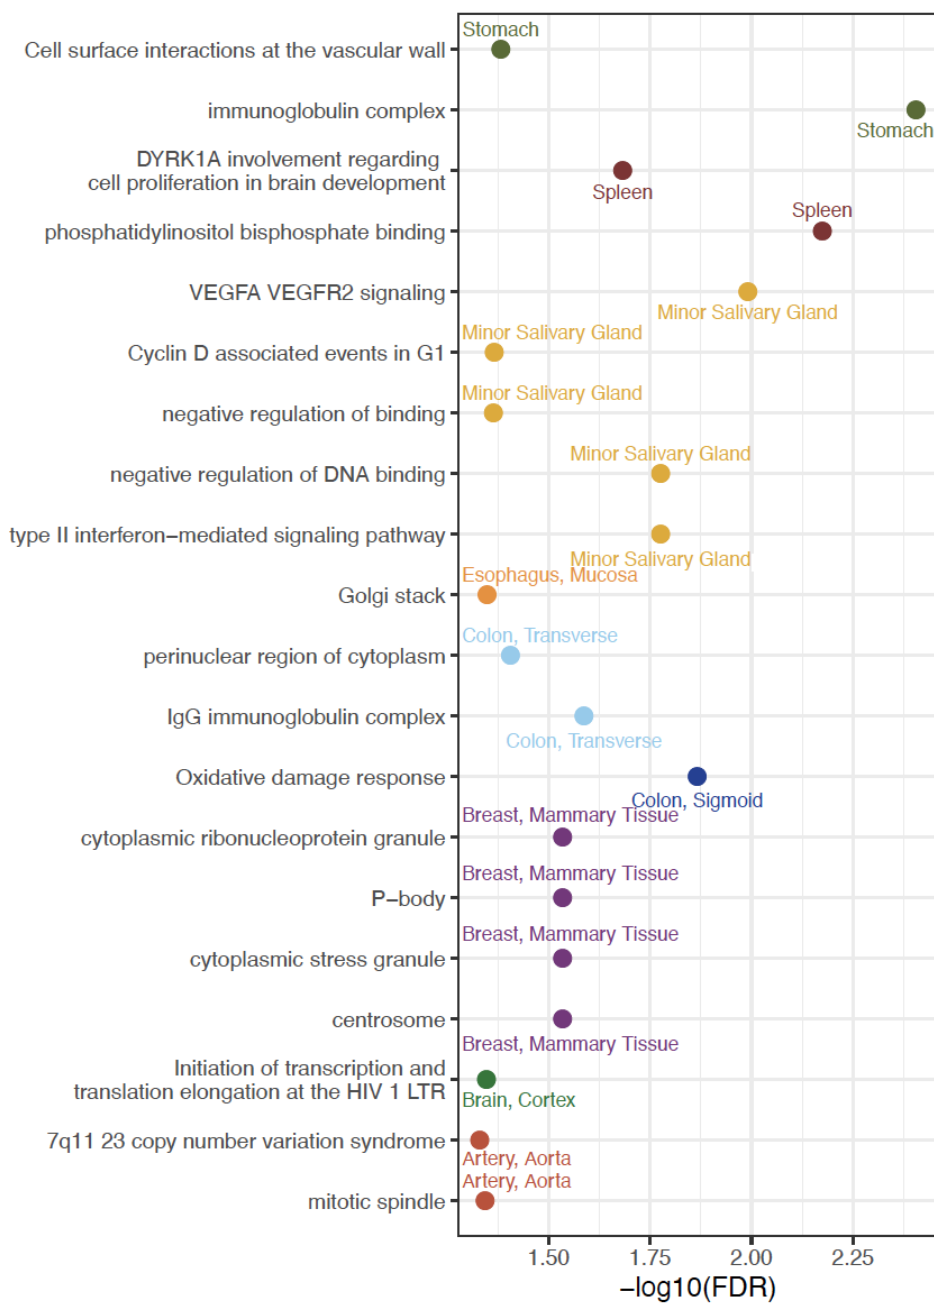**C**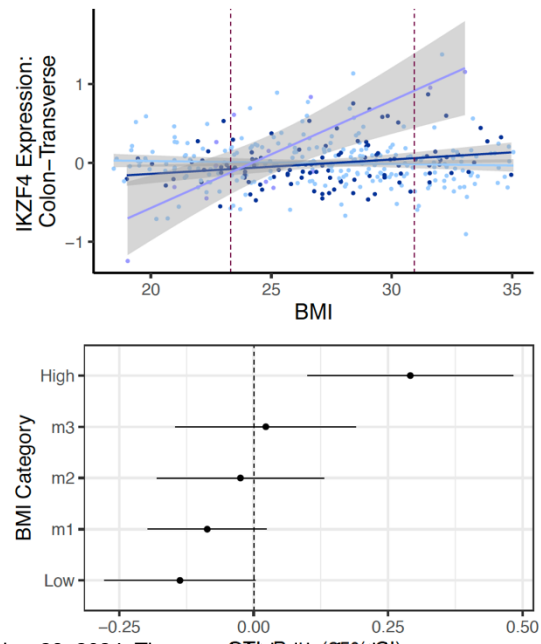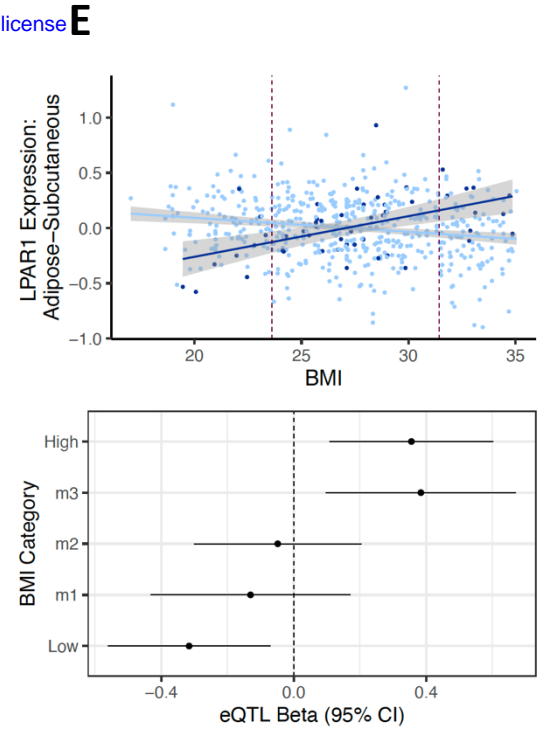**D**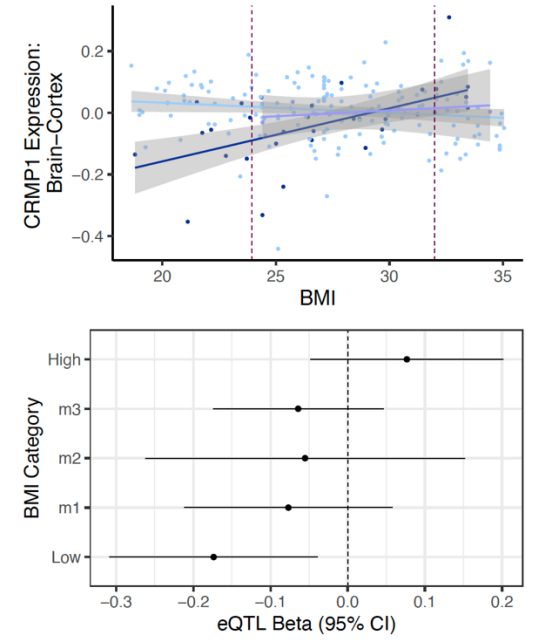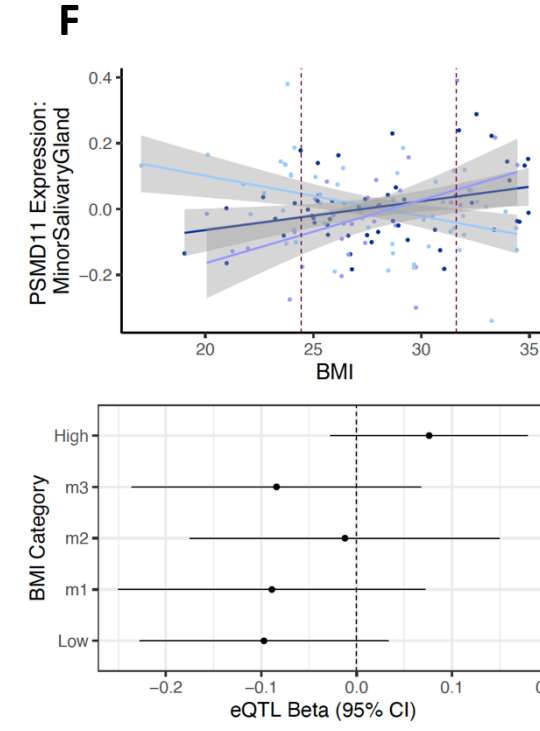**E**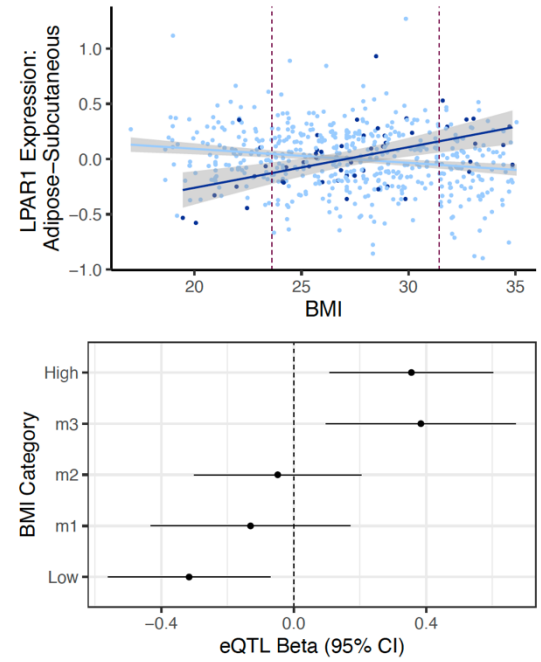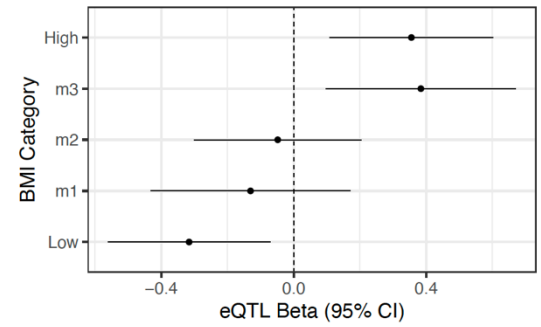**F**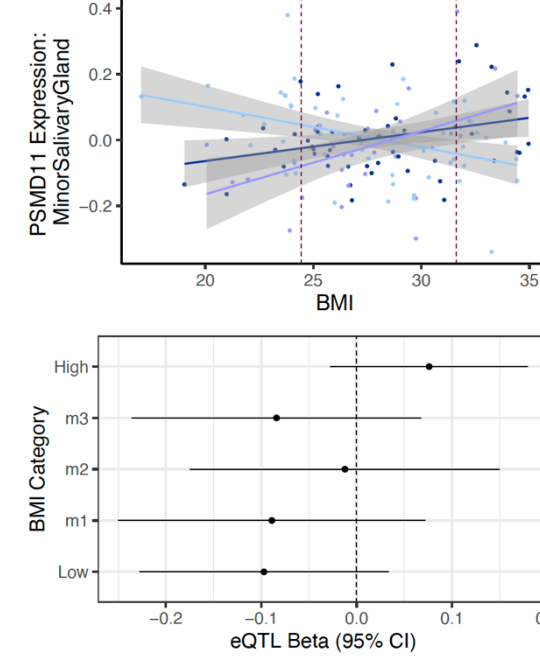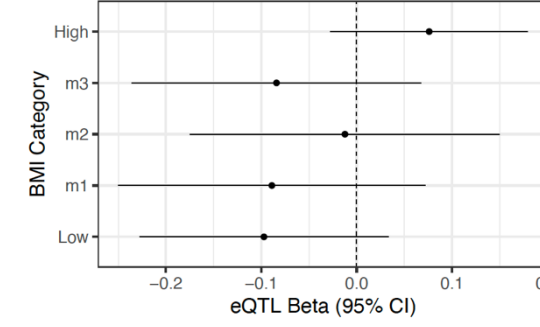**G**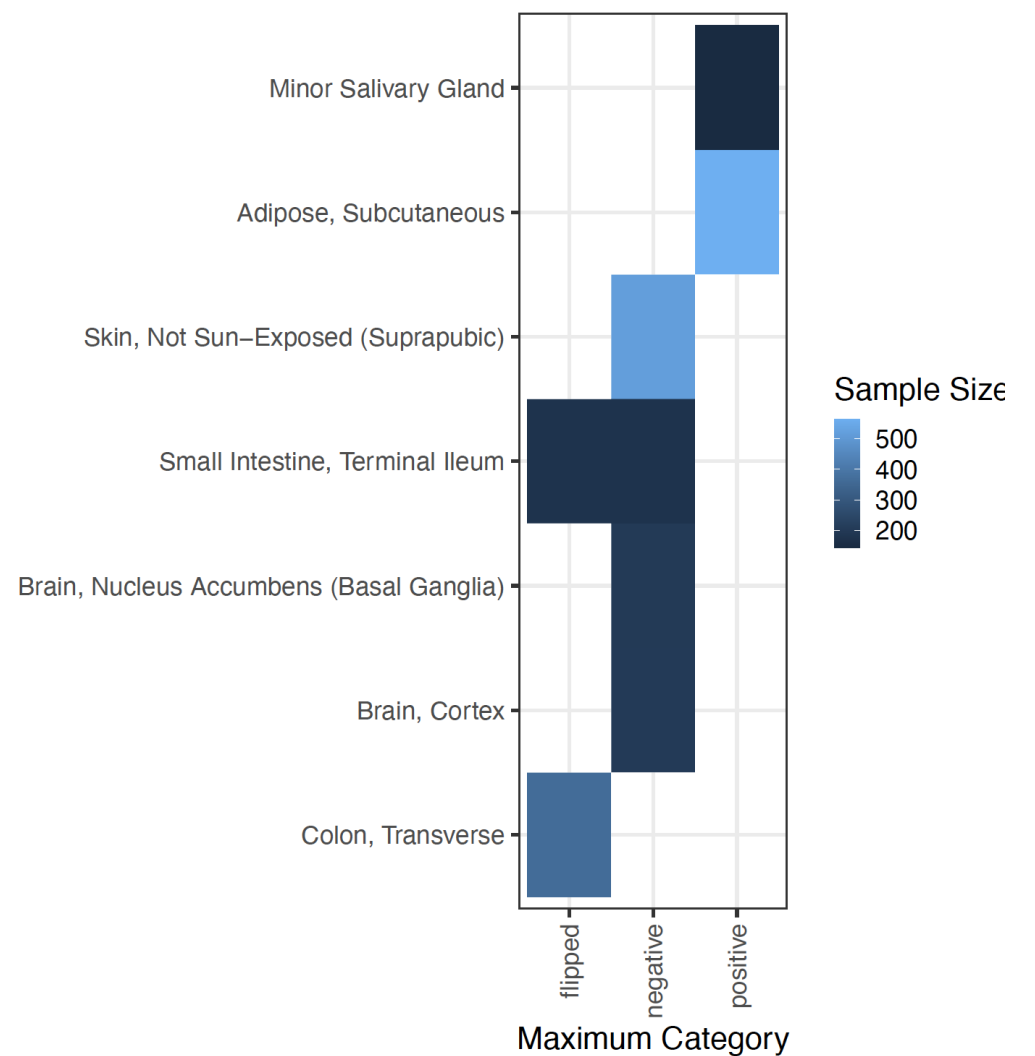



**A**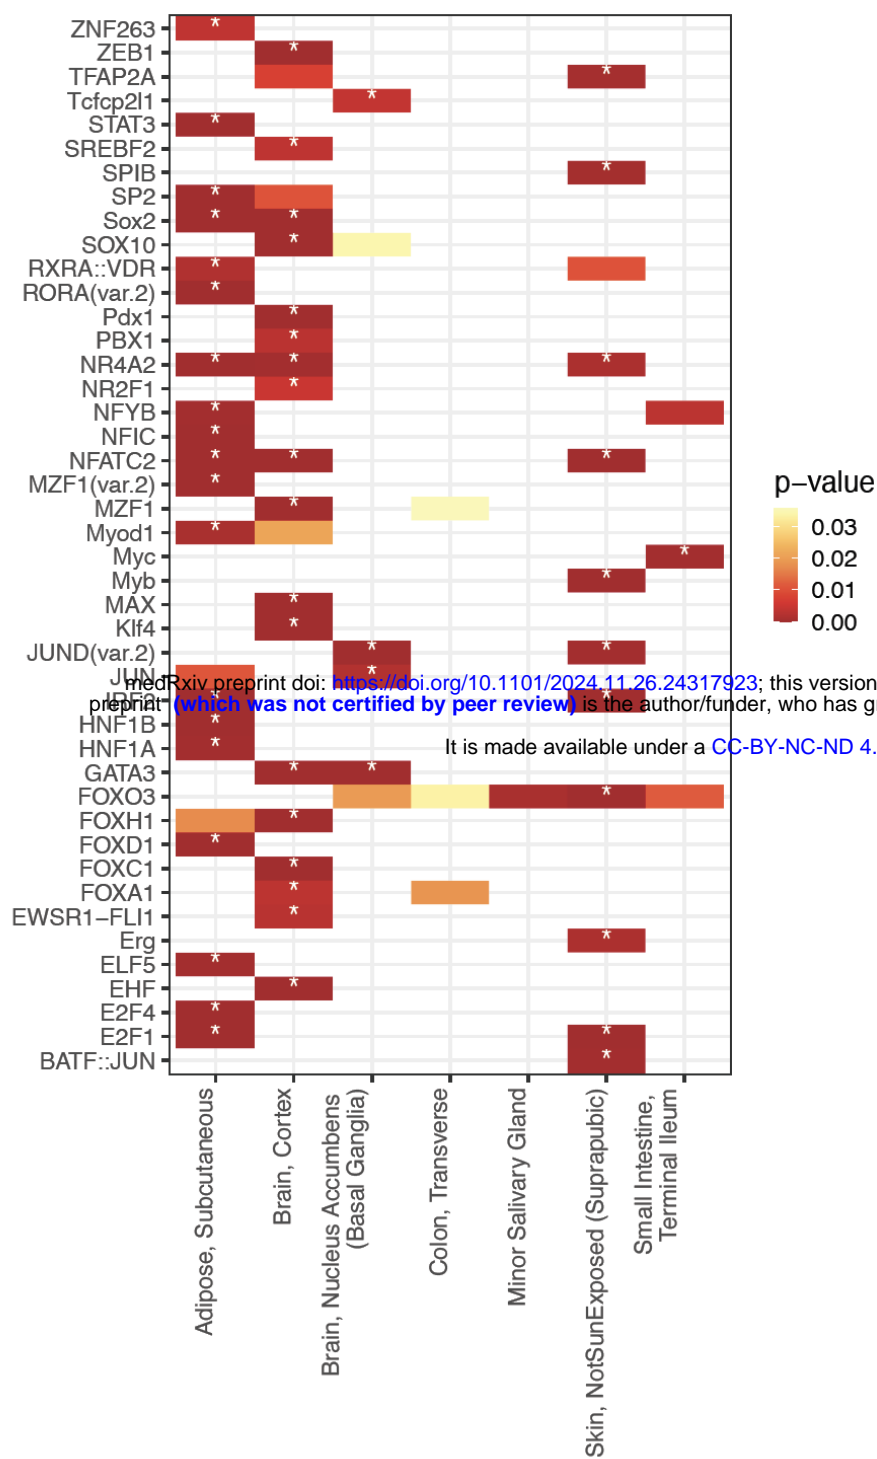**B**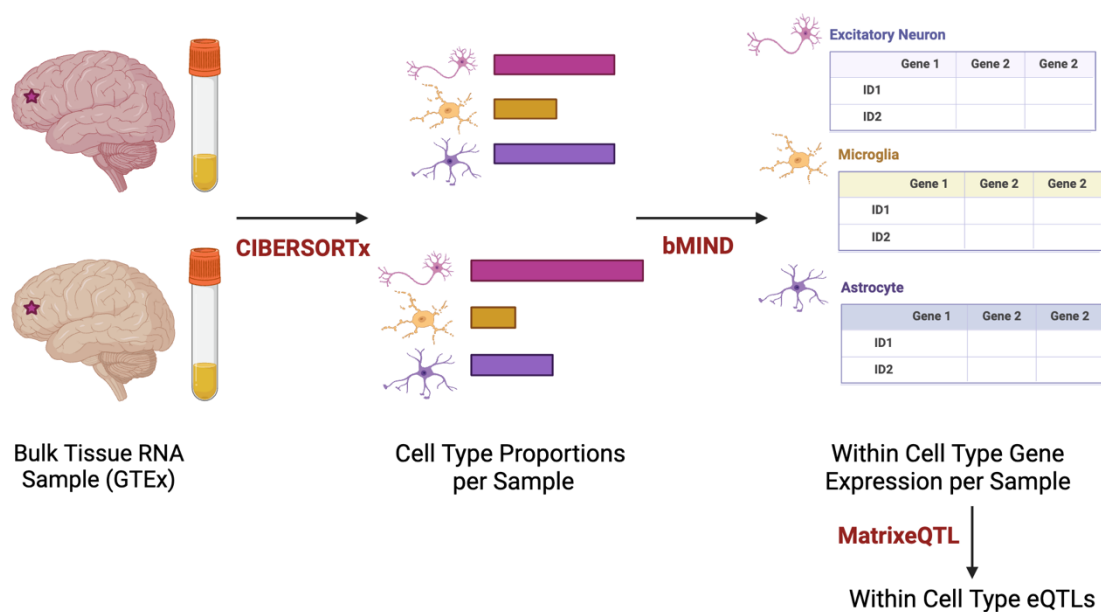**C**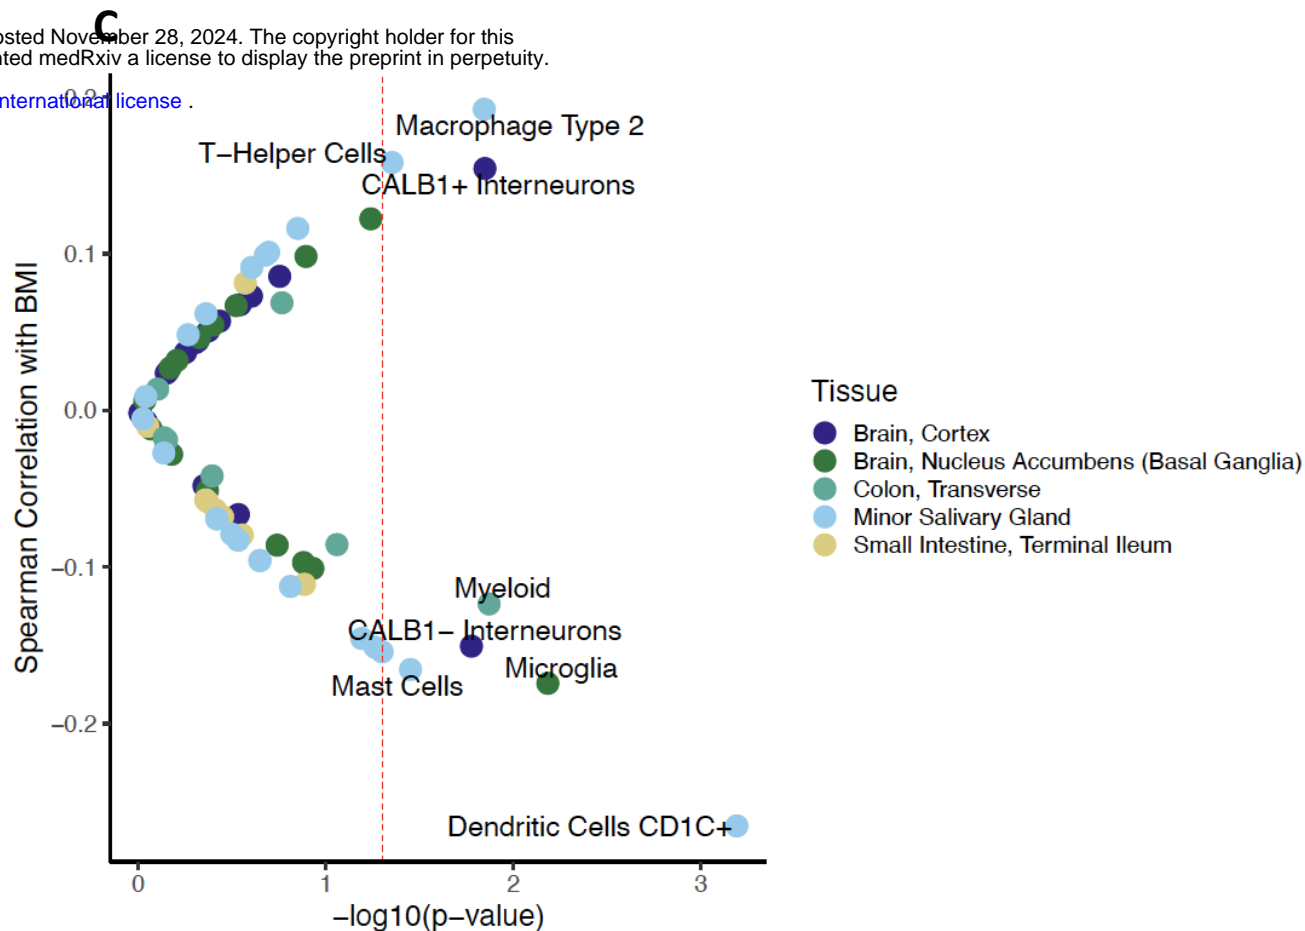**D**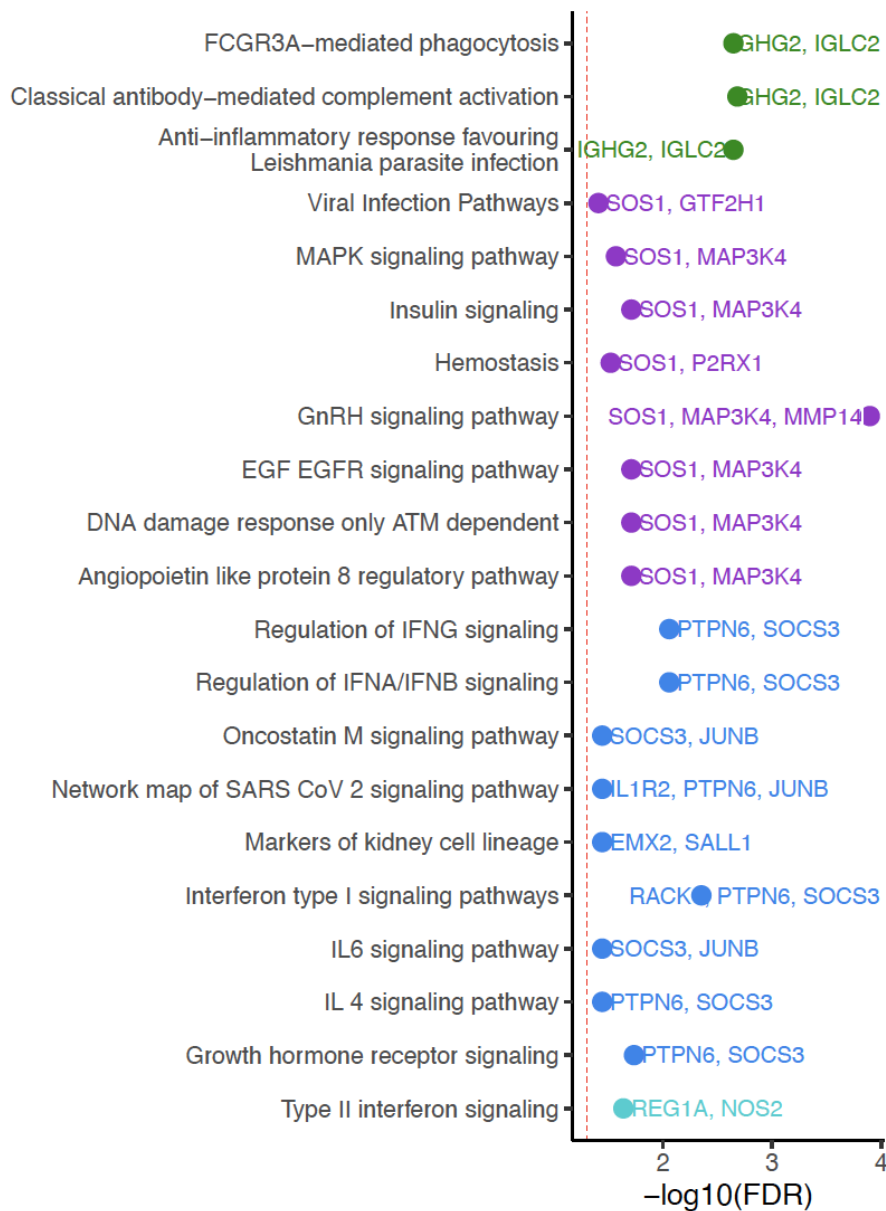**E**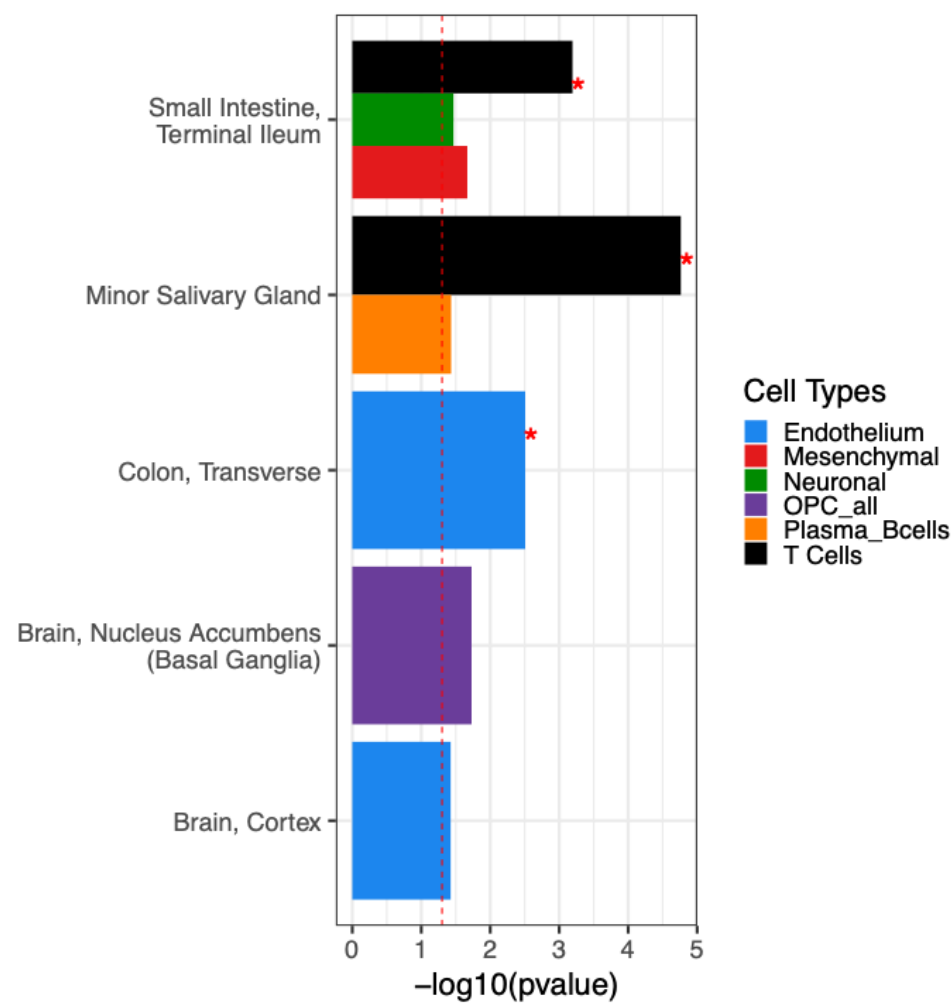

**A**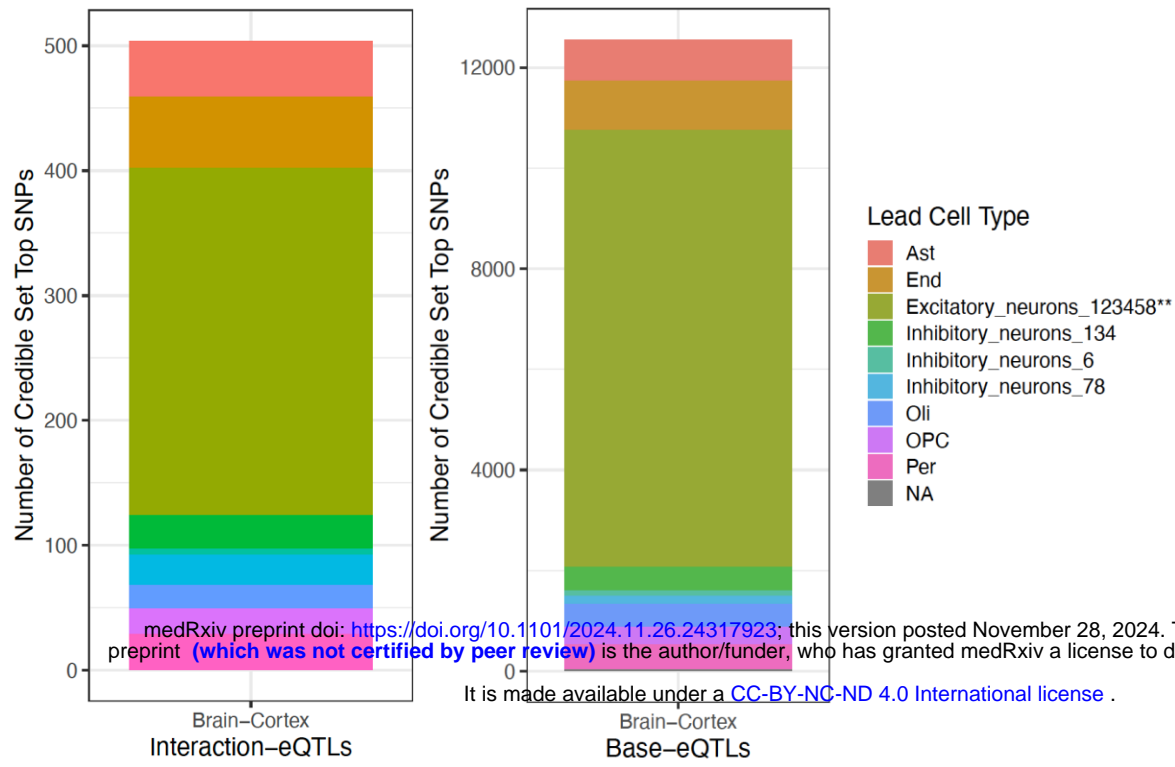**C**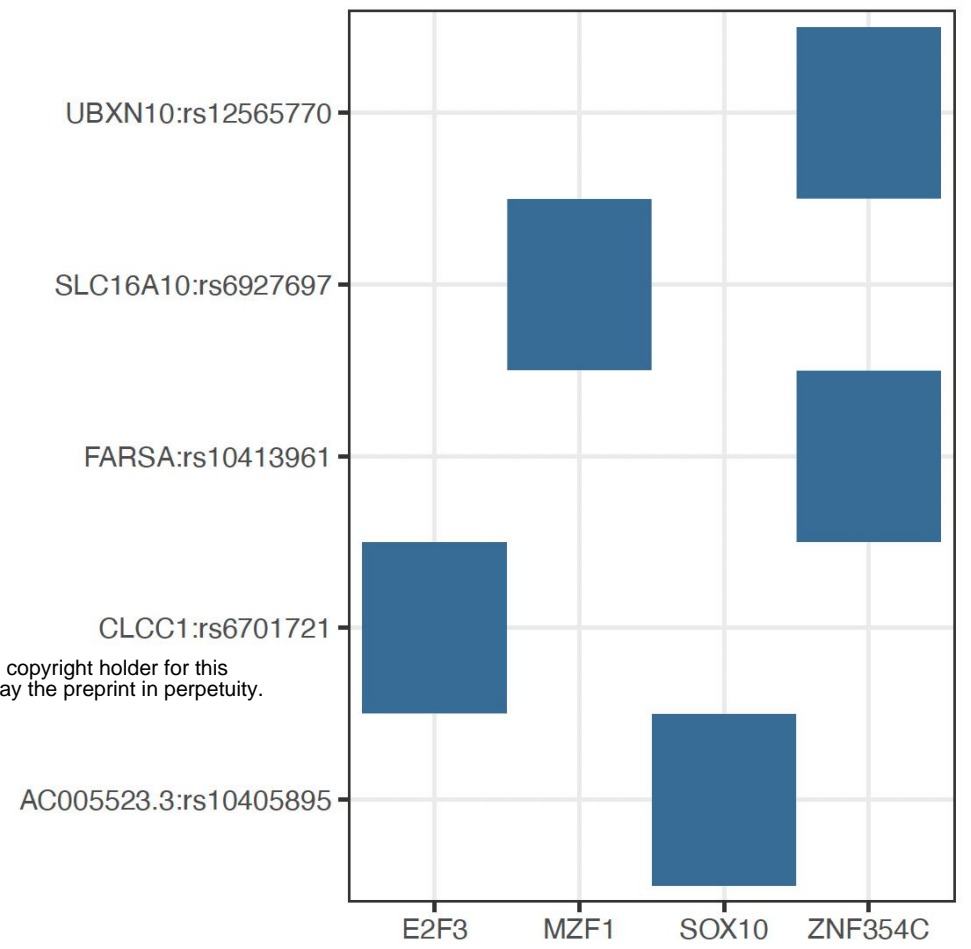**B**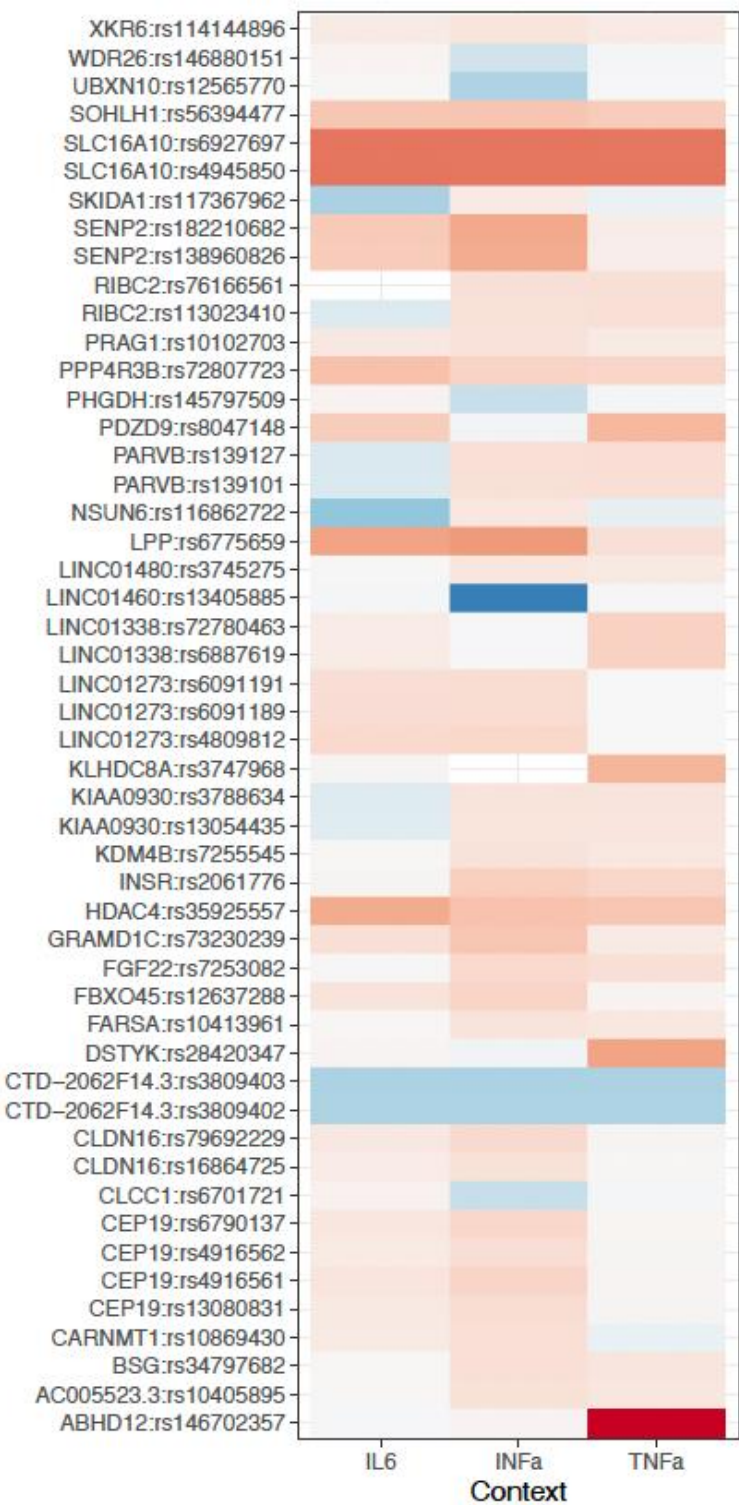**D**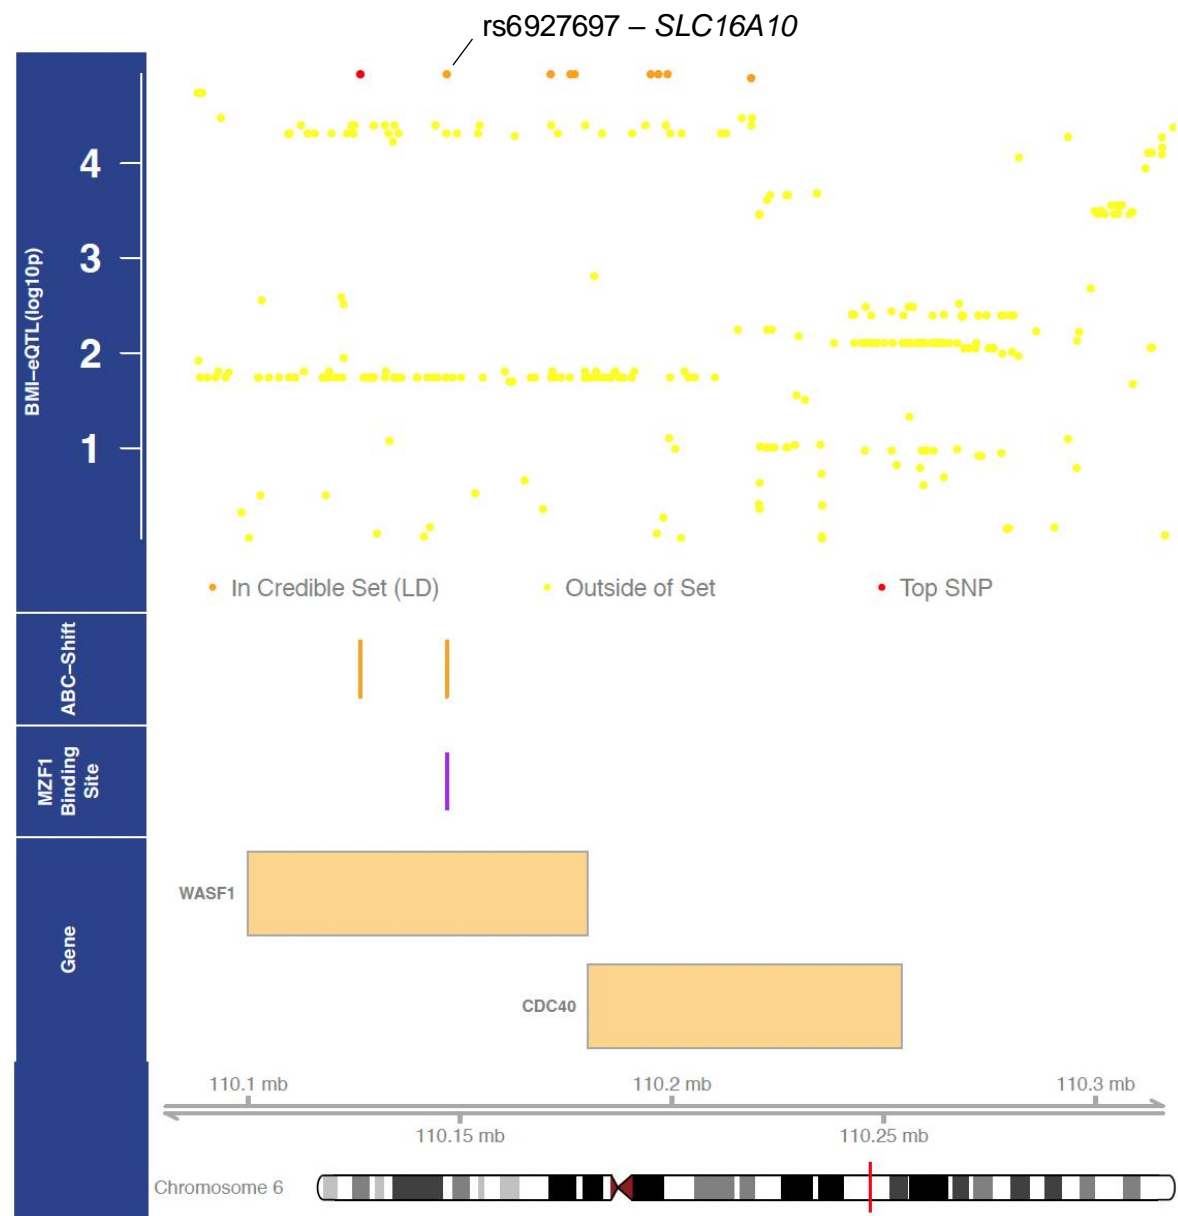



**A**

**BMI-Dynamic Gene Expression Predictor Model Building**

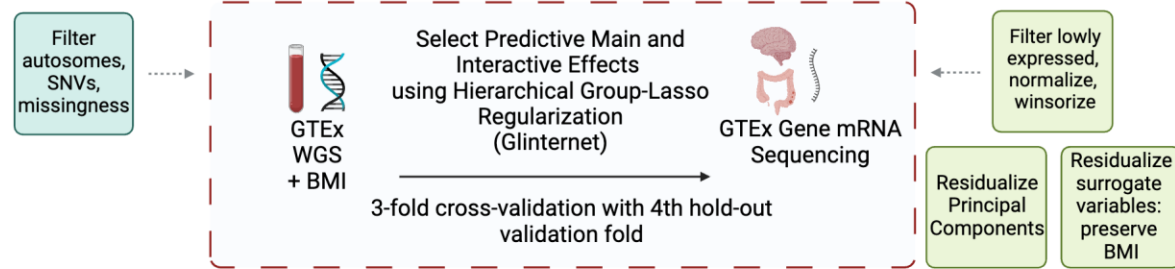

| Predictor Model                   | Variables Available for Selection                              | Output                                                                                     |
|-----------------------------------|----------------------------------------------------------------|--------------------------------------------------------------------------------------------|
| Published GReX Models (PredictDB) | SNPs in cis-window                                             | Gene expression predicted by SNPs in one tissue                                            |
| BMI-Dynamic Models                | SNPs in cis-window, BMI, and all possible BMI*SNP Interactions | Gene expression predicted any combination of SNPs, BMI, SNP*BMI Interactions in one tissue |

**D**

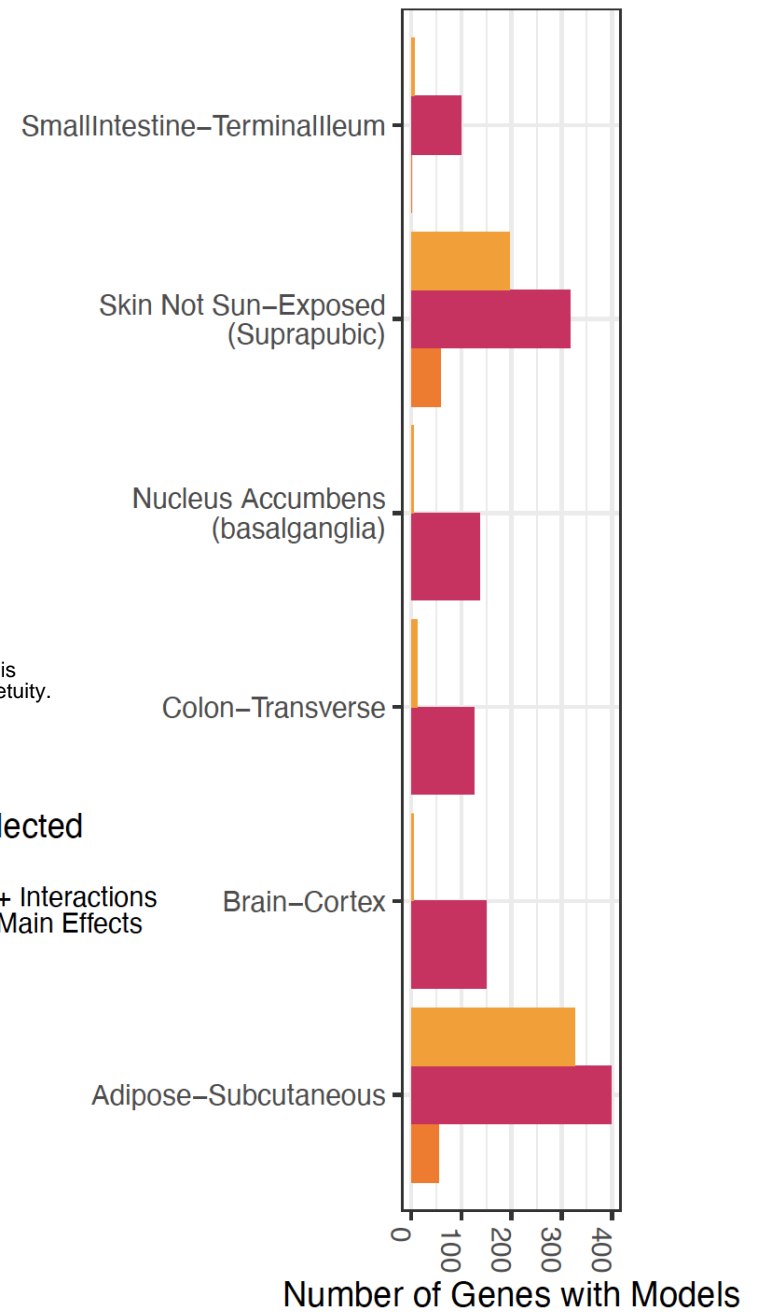

medRxiv preprint doi: <https://doi.org/10.1101/2024.11.26.24317923>; this version posted November 28, 2024. The copyright holder for this preprint (which was not certified by peer review) is the author/funder, who has granted medRxiv a license to display the preprint in perpetuity.

**B**

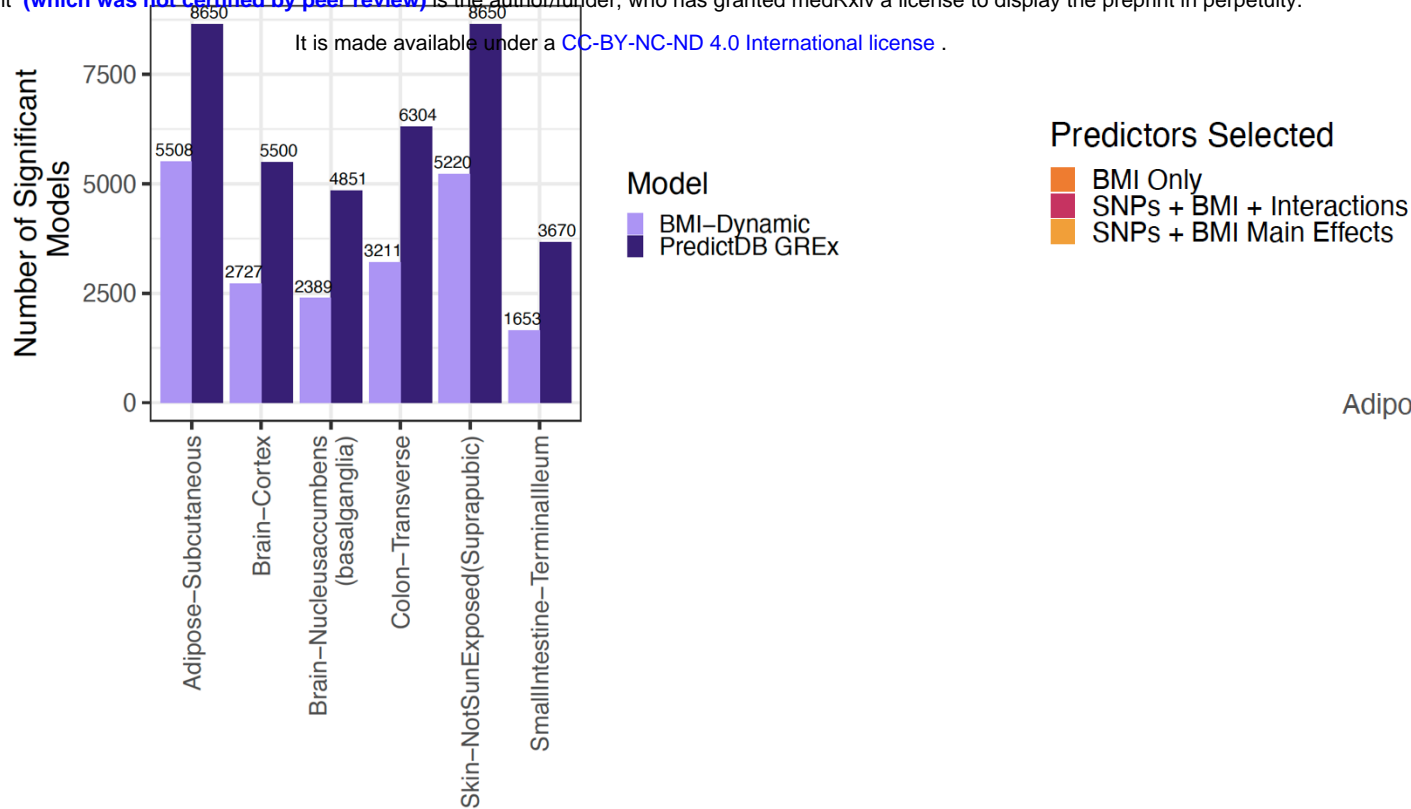

**C**

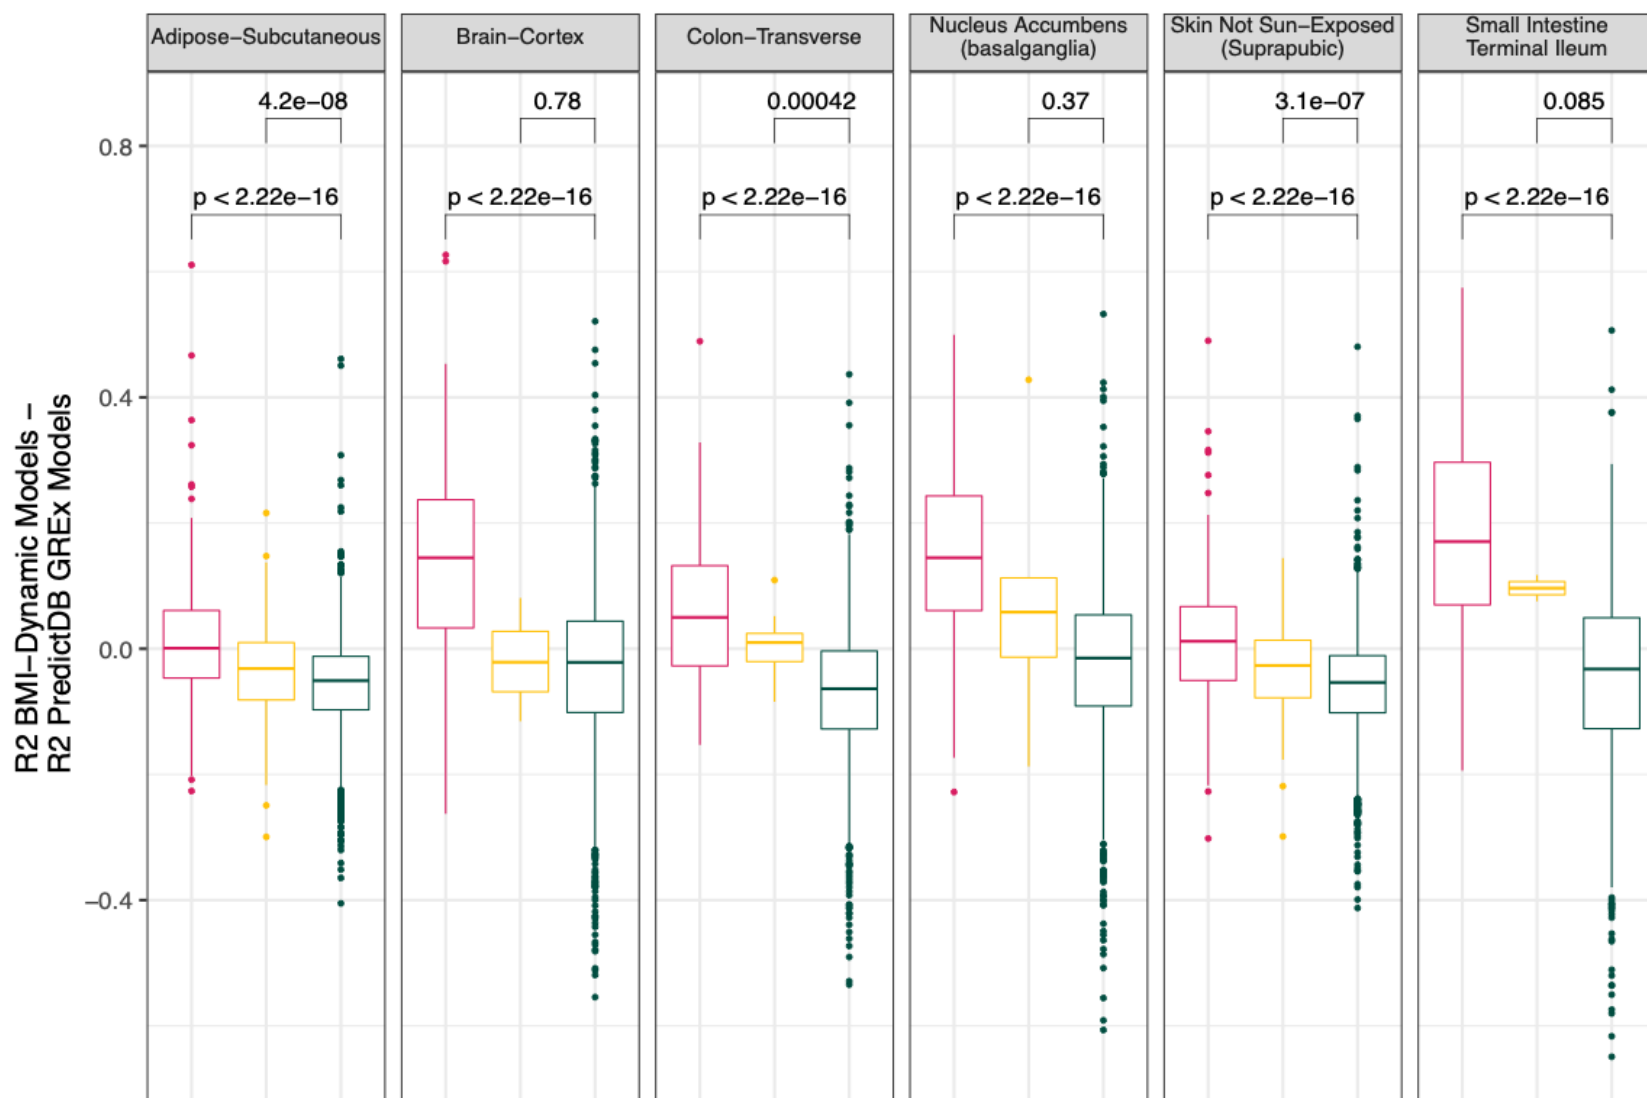

Predictors in Model ■ Includes a BMI\*SNP Interaction ■ Includes BMI as a Main Effect ■ Includes Only SNP Main Effects

# Application of Gene Expression Predictor Models in the UK Biobank (UKB)

**A**

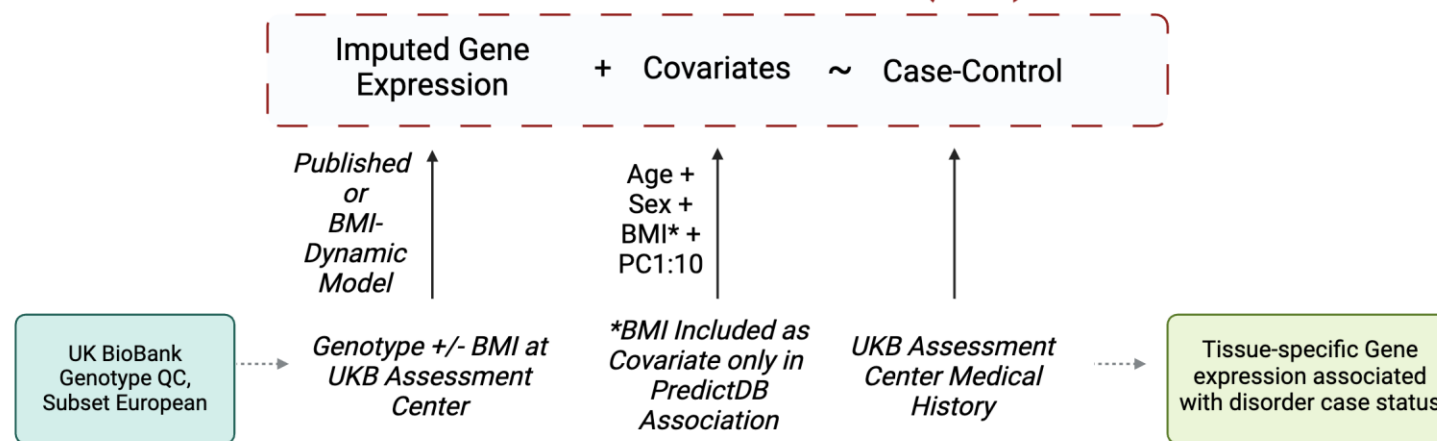

**B**

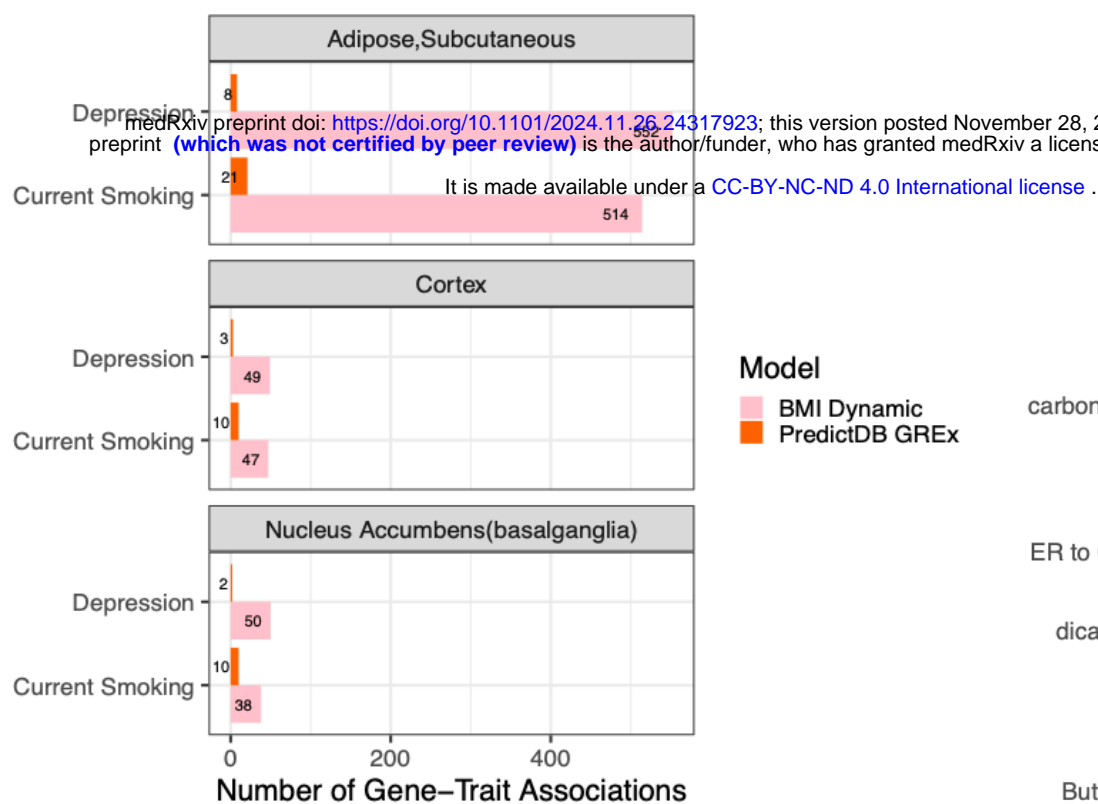

**C**

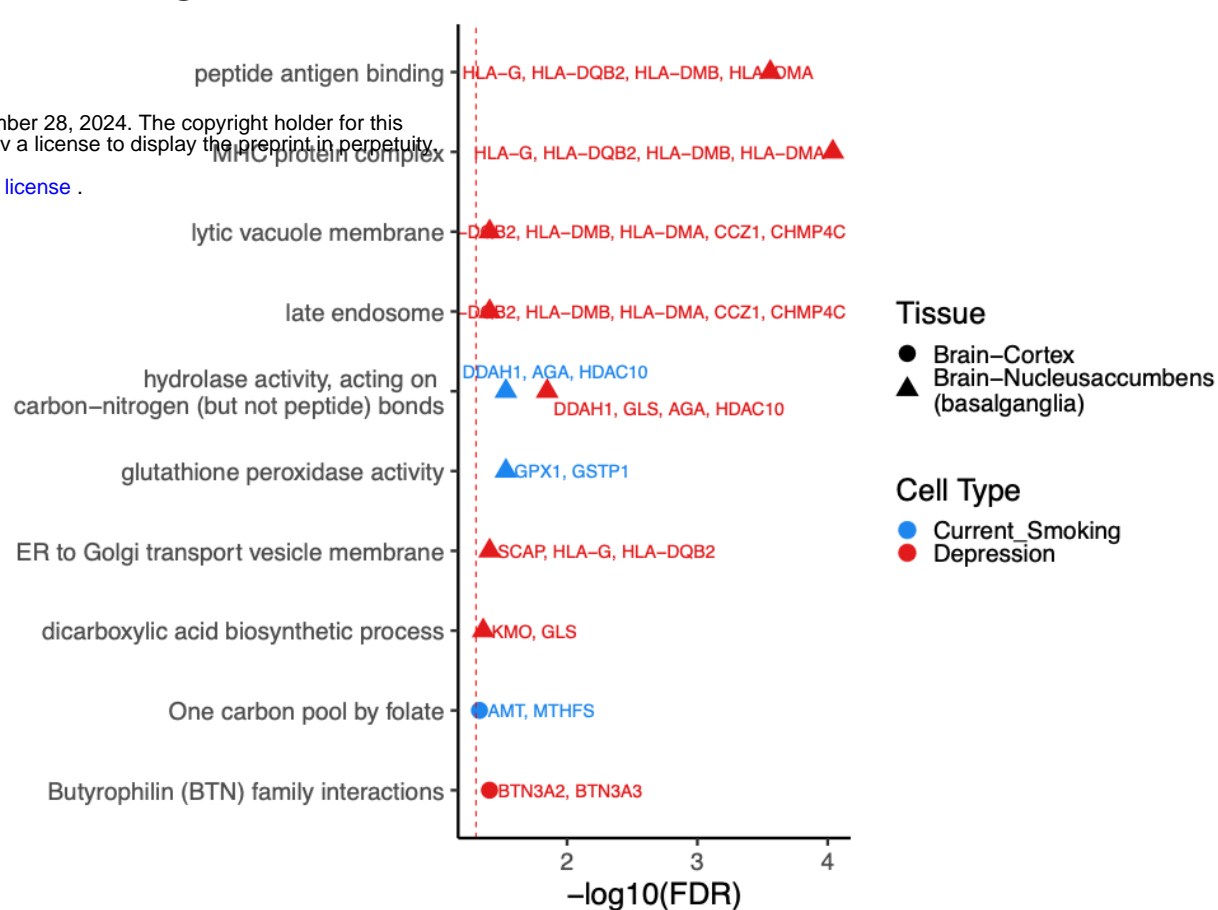

**D**

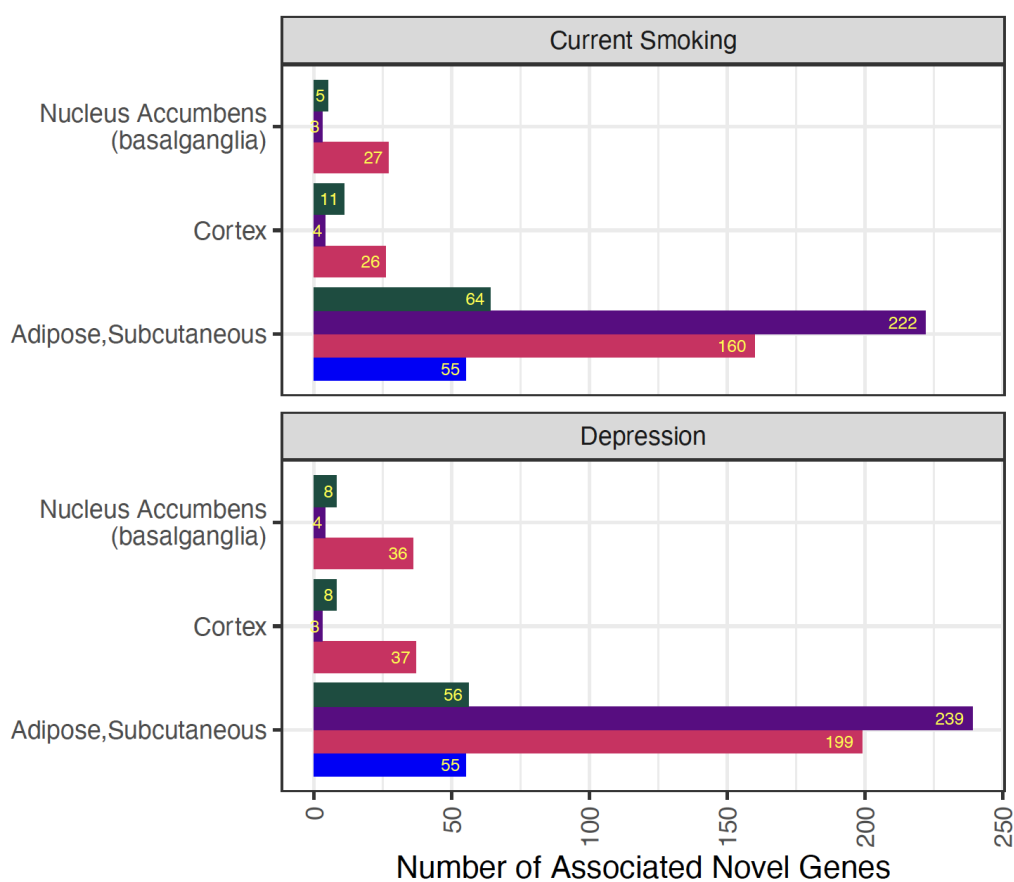

**E**

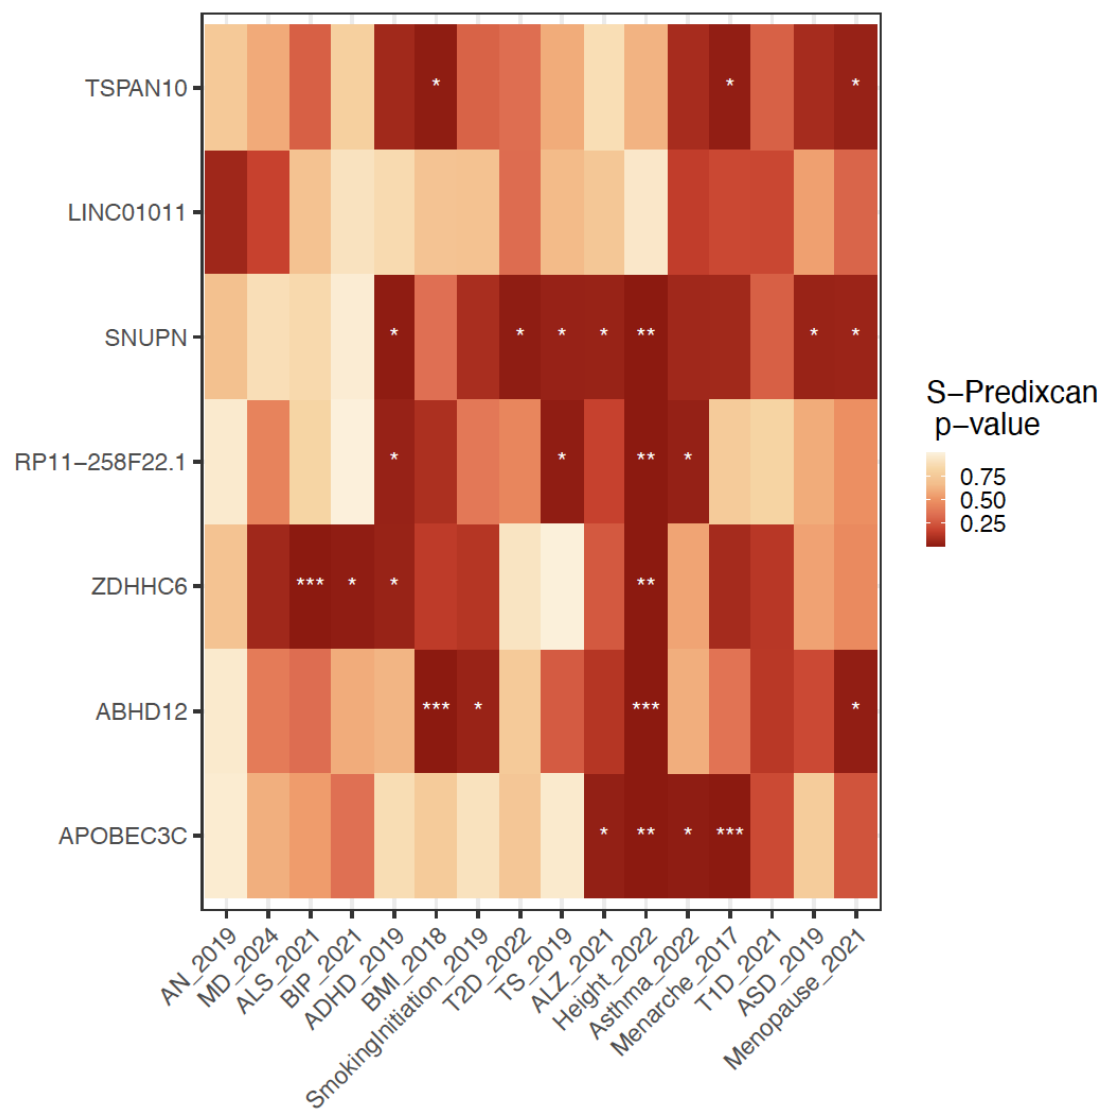

Predictors for Gene

- BMI Only
- SNPs + BMI + Interactions
- SNPs + BMI Main Effects
- SNPs Only
