# Supplementary material for: BMI Interacts with the Genome to Regulate Gene Expression Globally, with Emphasis in the Brain and Gut
Source: bioRxiv or medRxiv preprint supplement (doi:10.1101/2024.11.26.24317923), 2024-11-28

**A**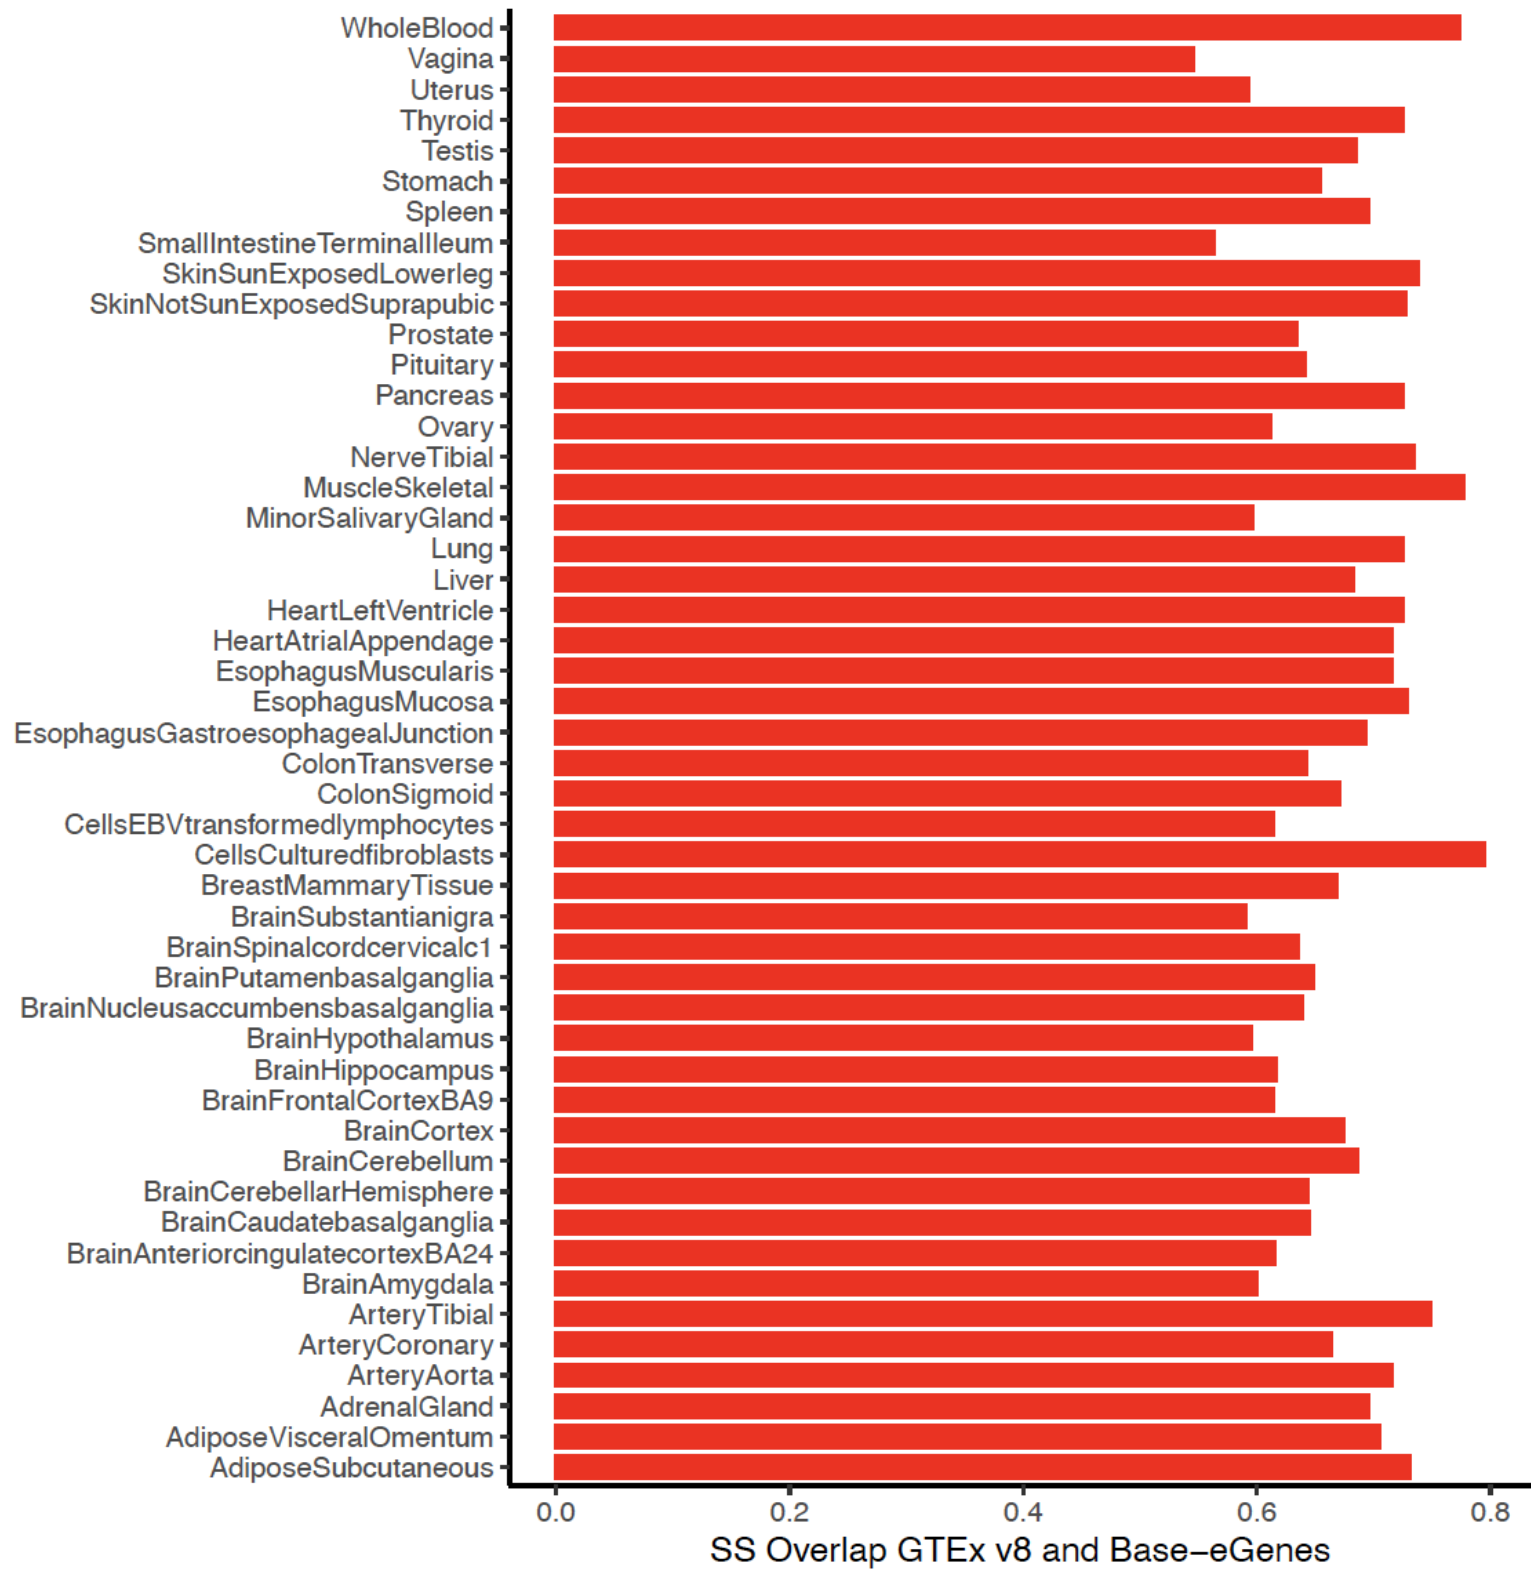**B**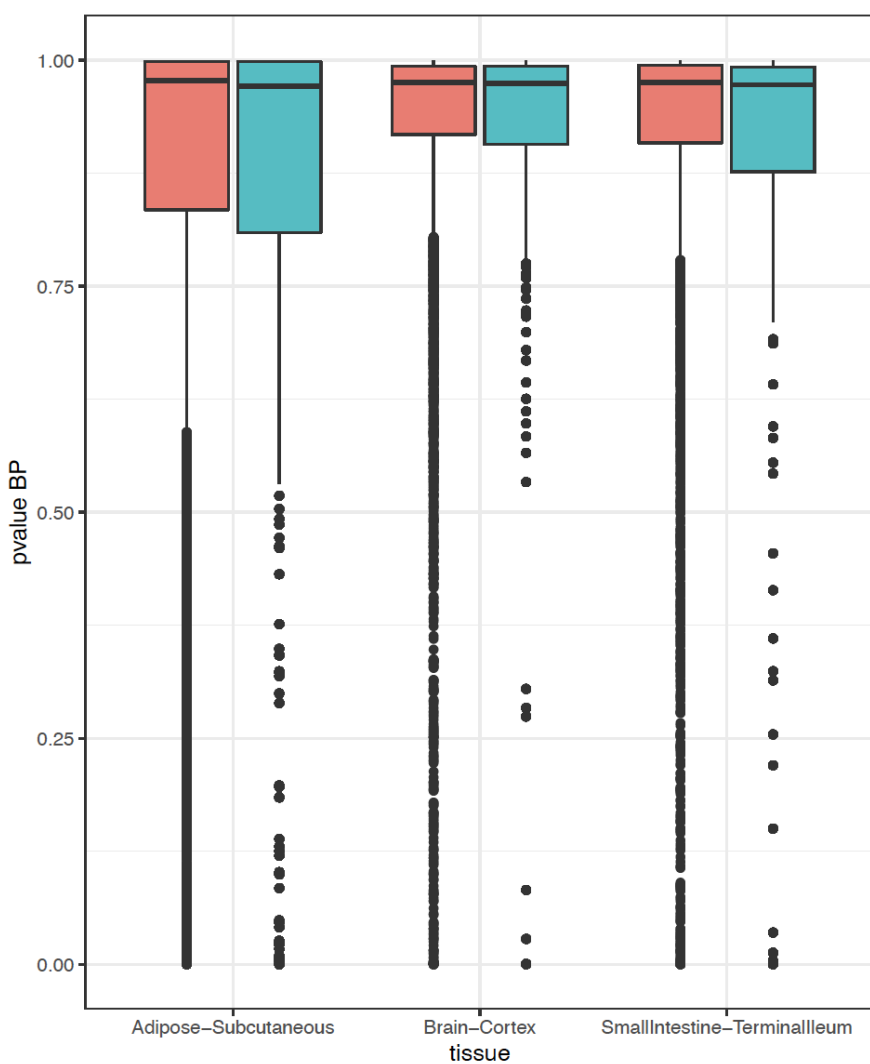**C**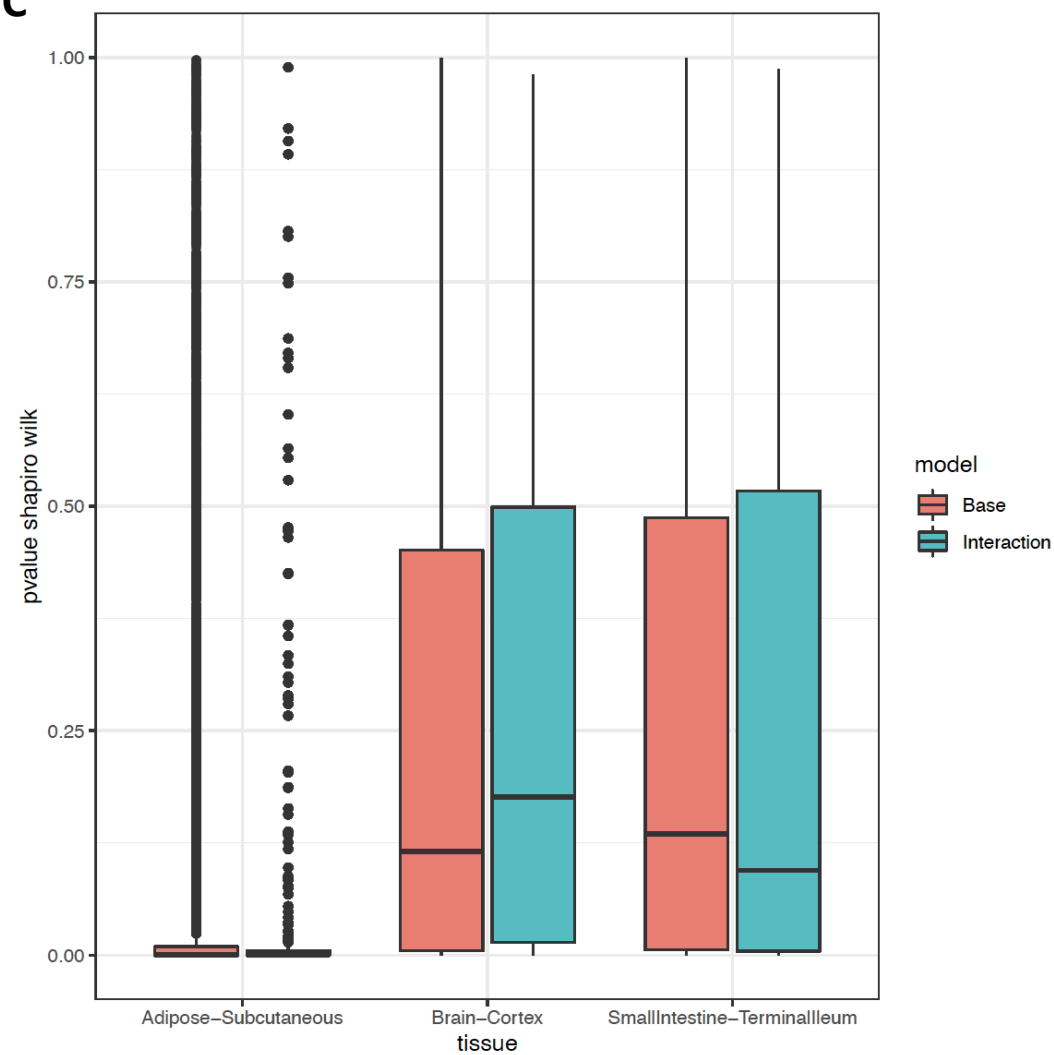

**A**

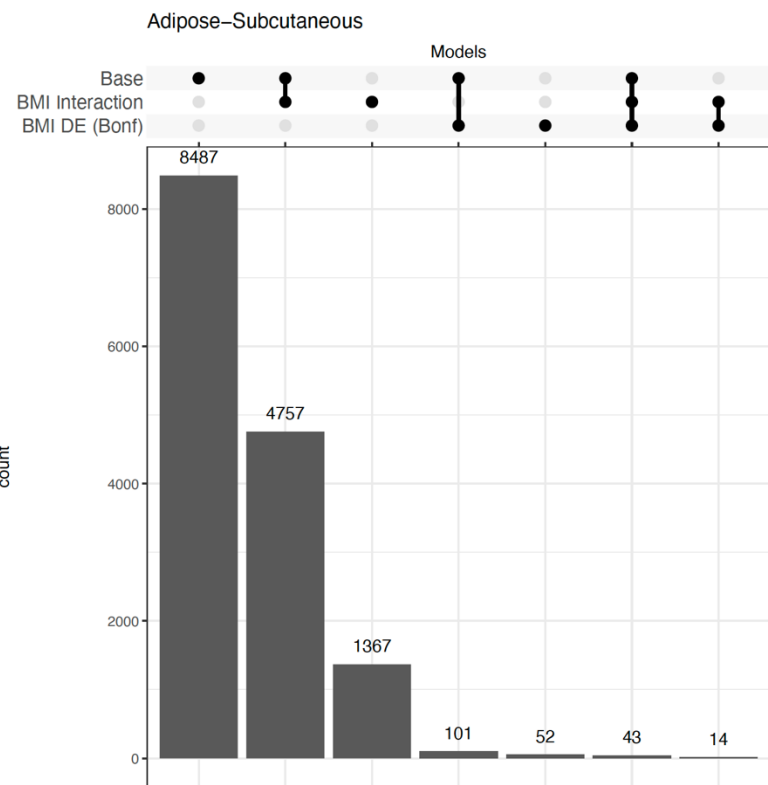

Brain-Cortex

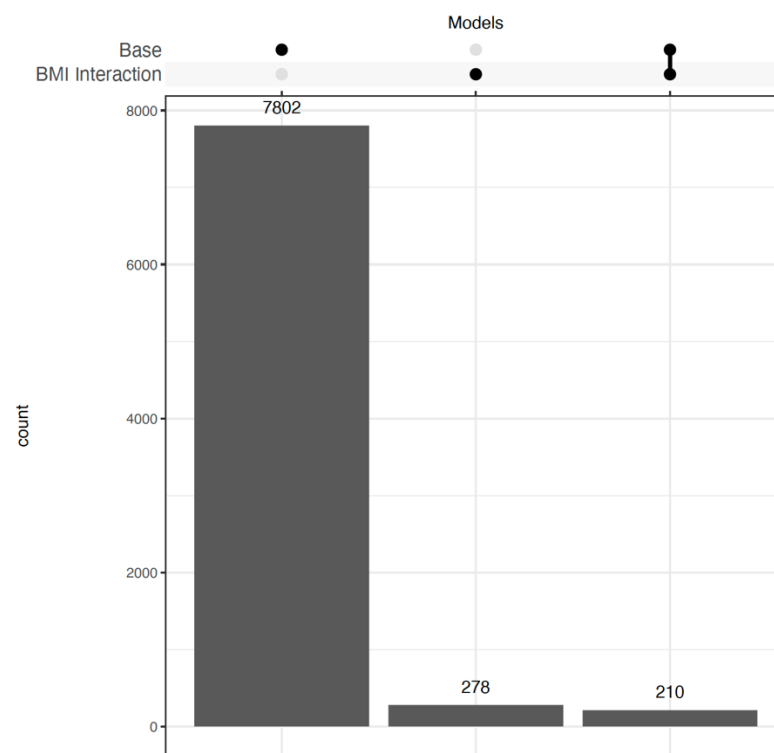

**B**

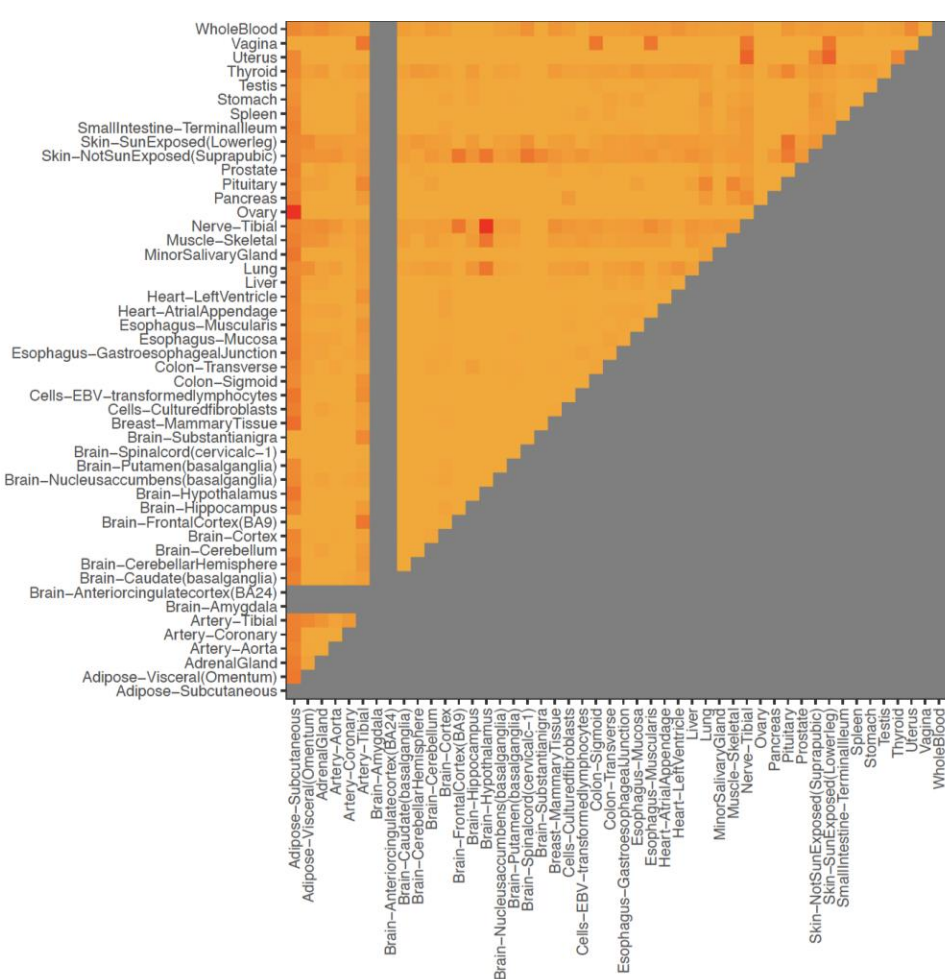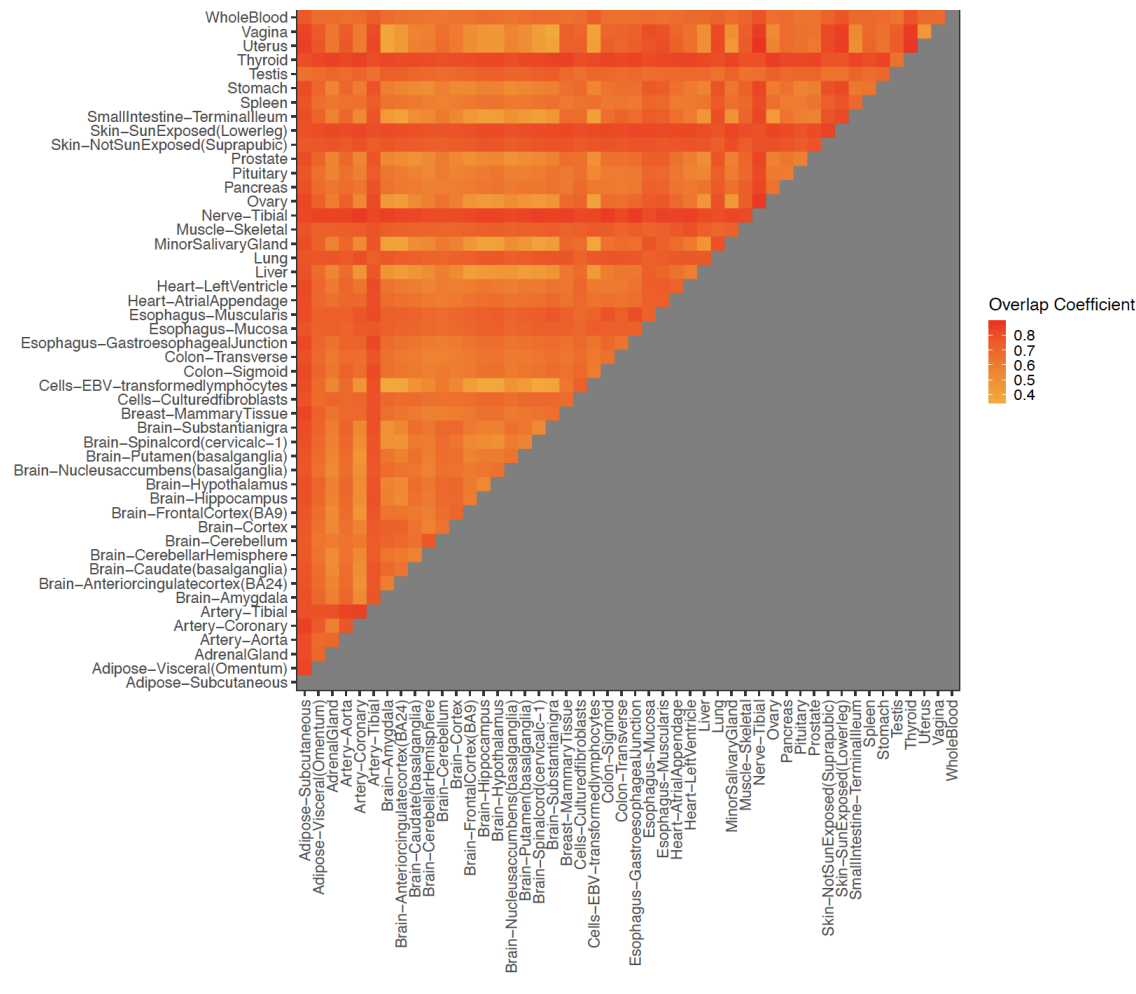

**C**

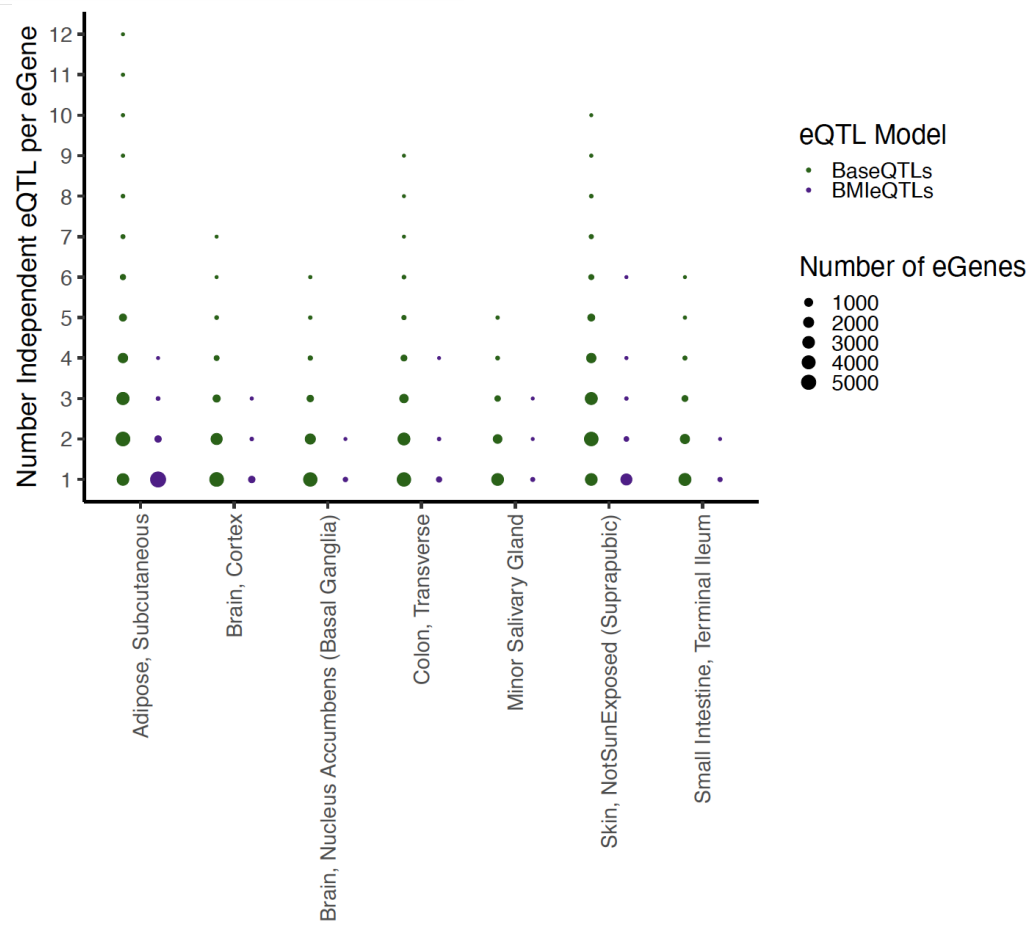

**A**

Are both high and low  
categorical models  
nominally significant?

yes

no

Do the betas have the same  
sign

Is neither edge significant?

yes

no

yes

no

**Uncertain**

Is  $abs(beta_{high}) >$   
 $abs(beta_{low})$

Is only the high model  
significant?

yes

no

yes

no

**Flipped****Positive****Negative****Positive****Negative****B**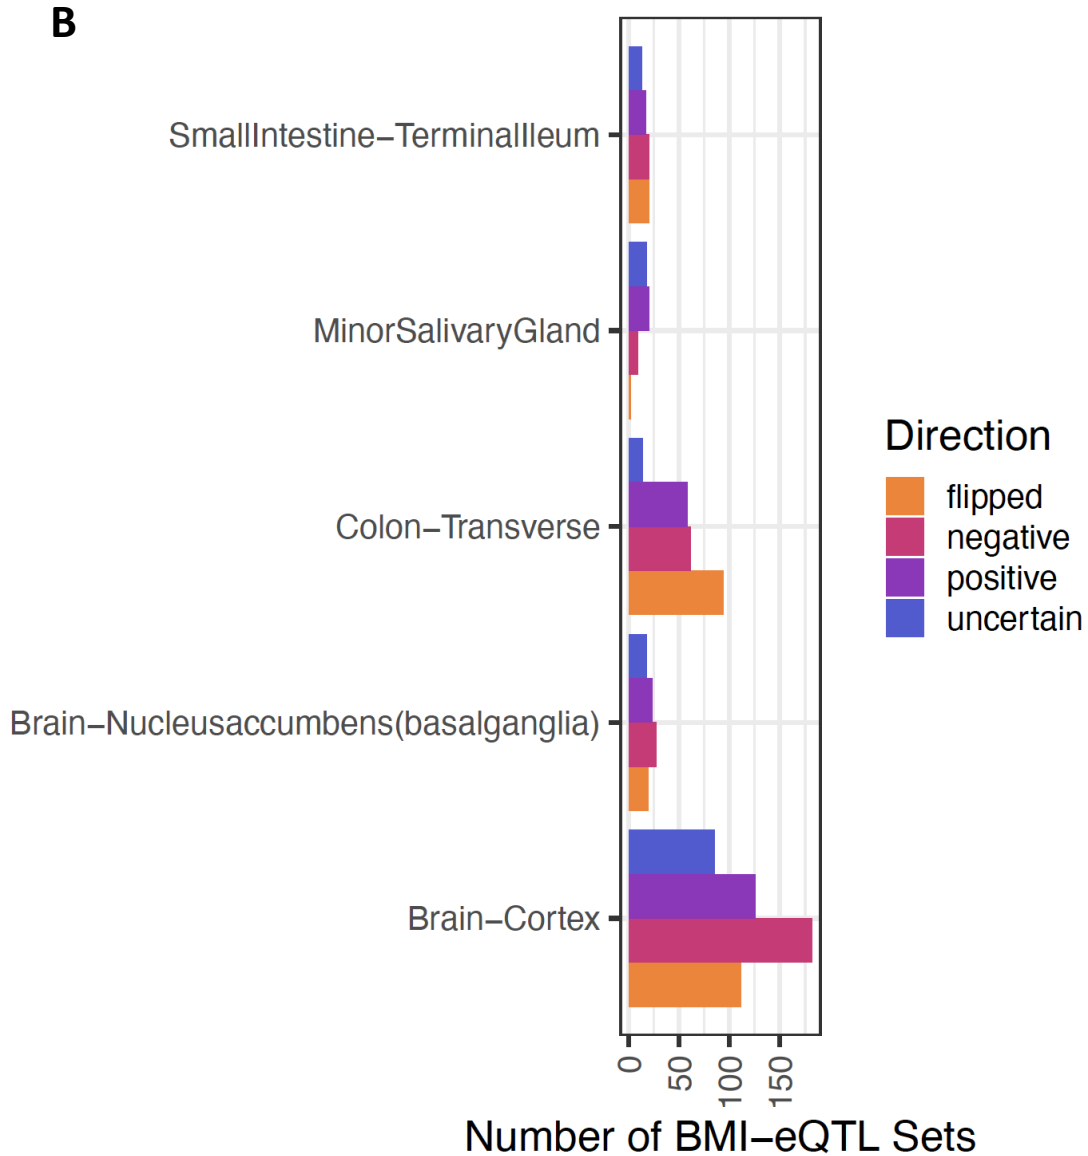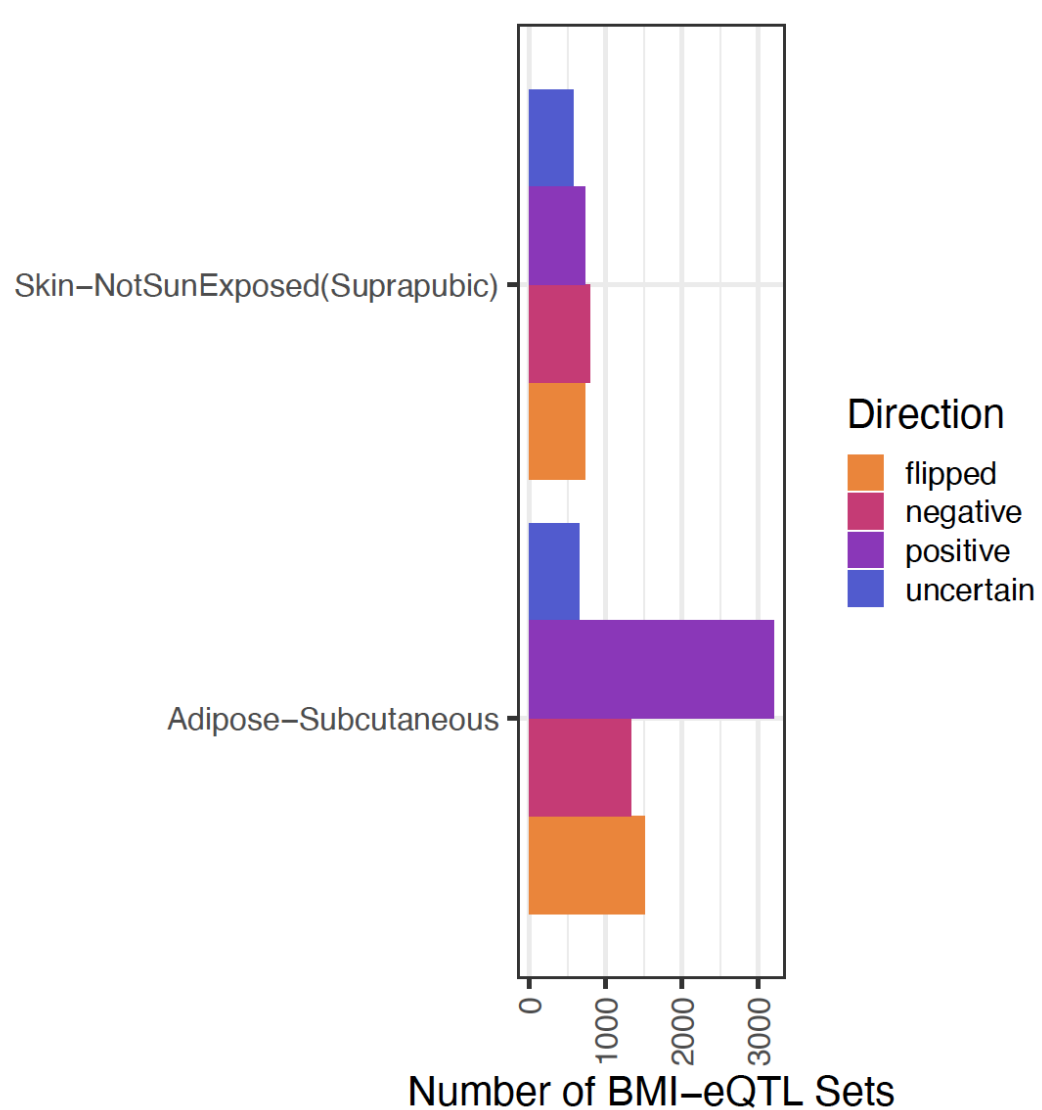

**A**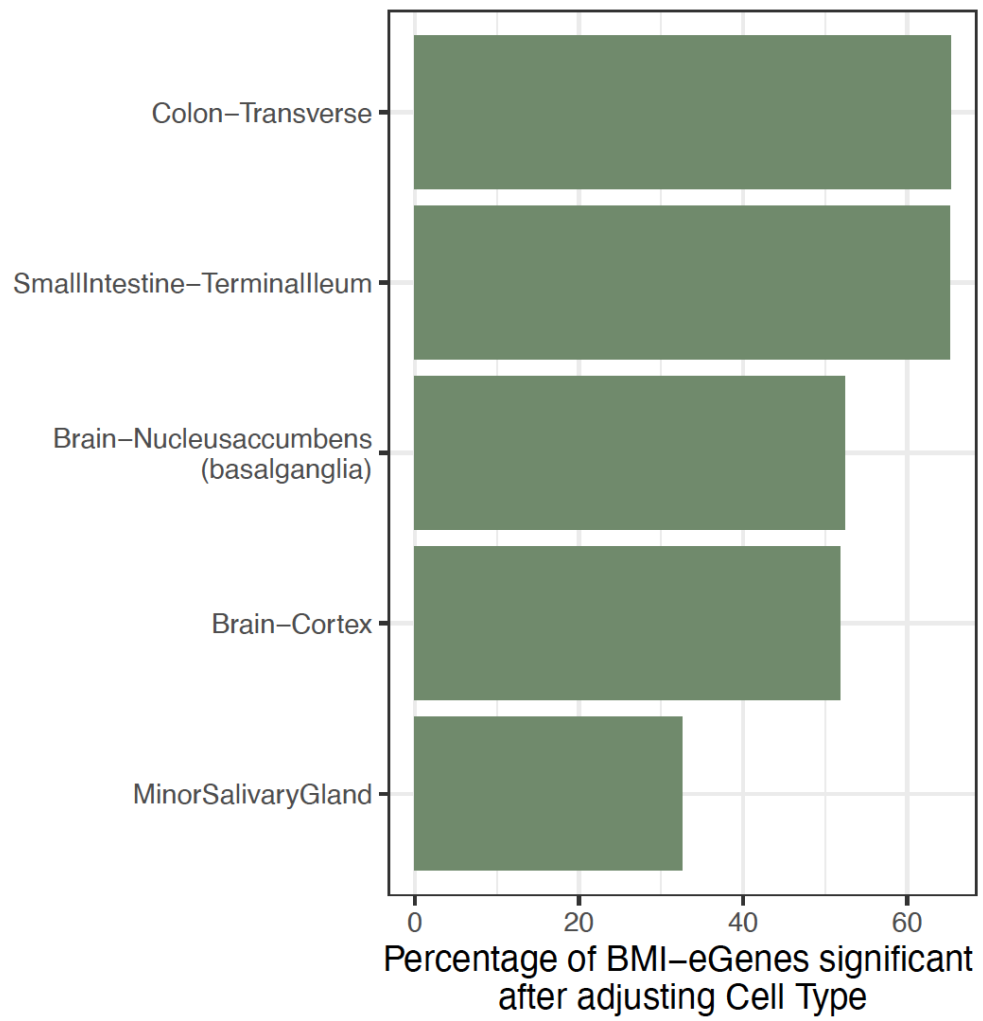**B**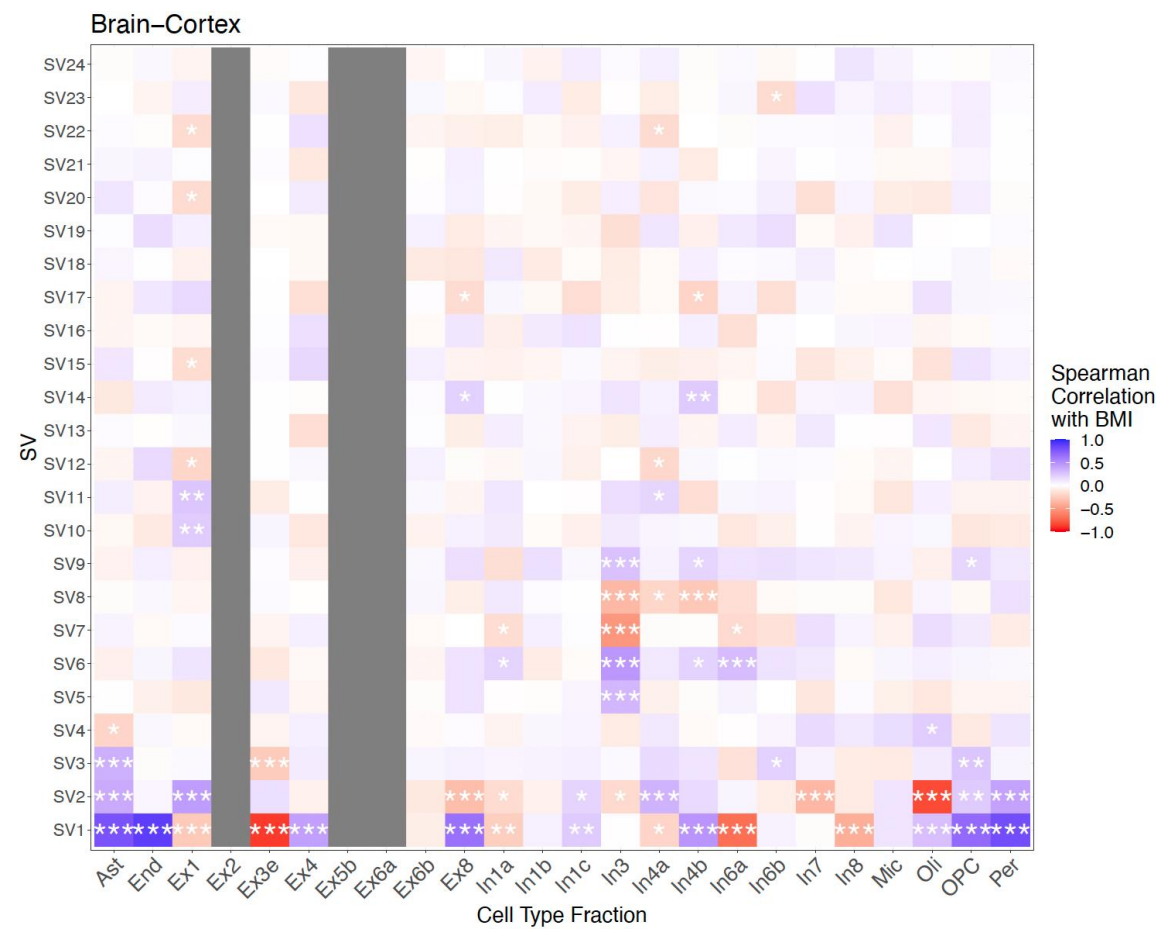**C**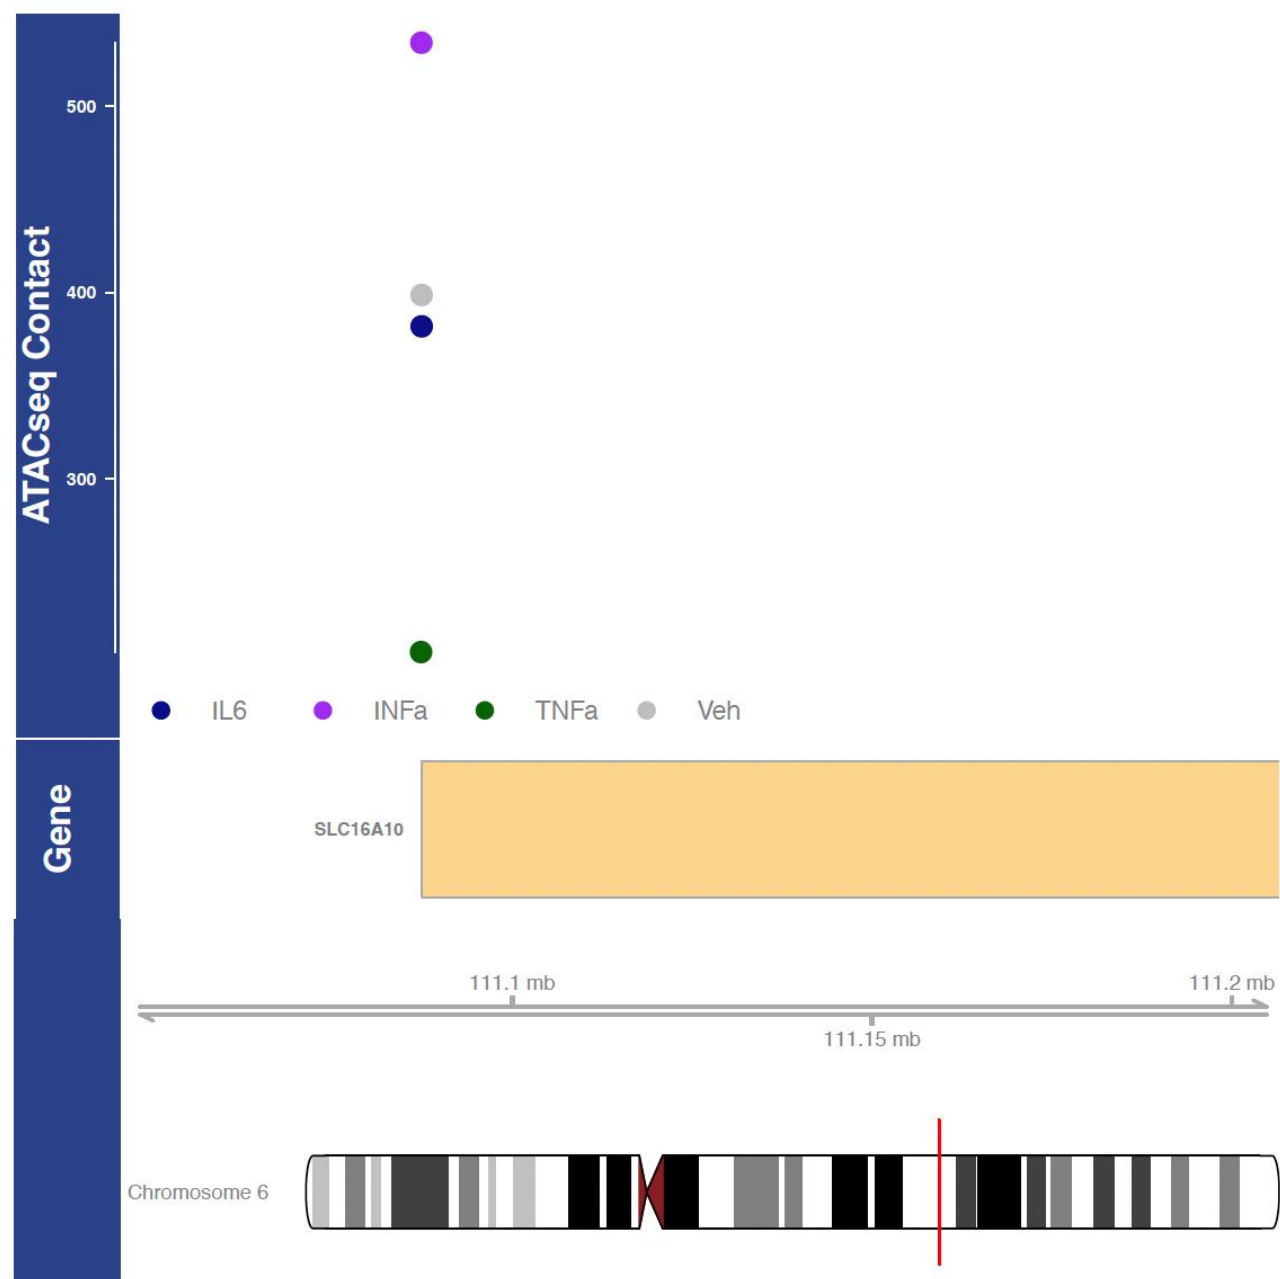



**A**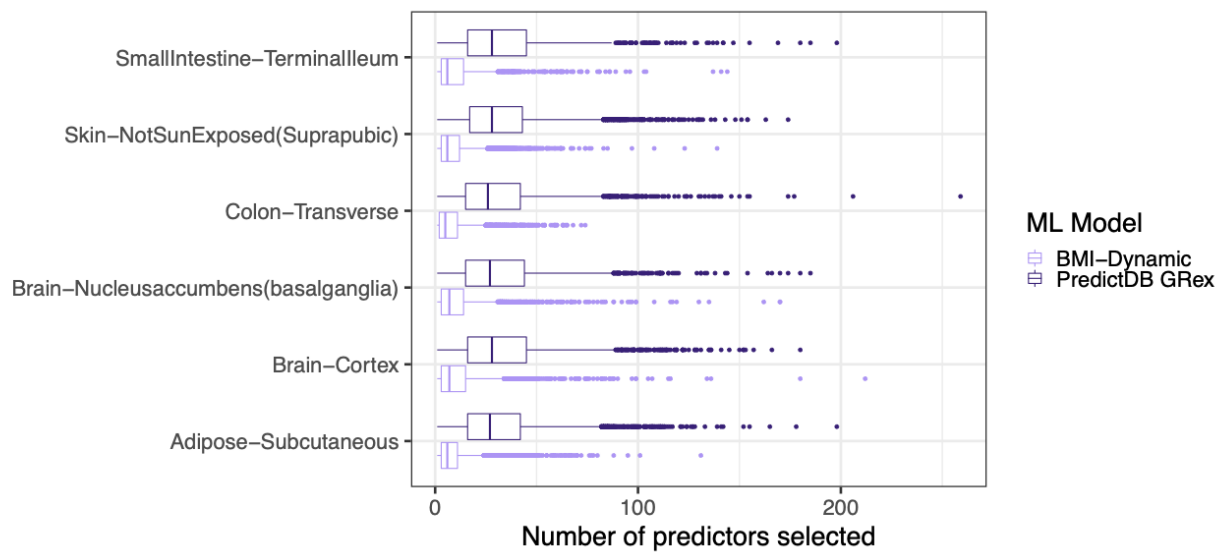**B**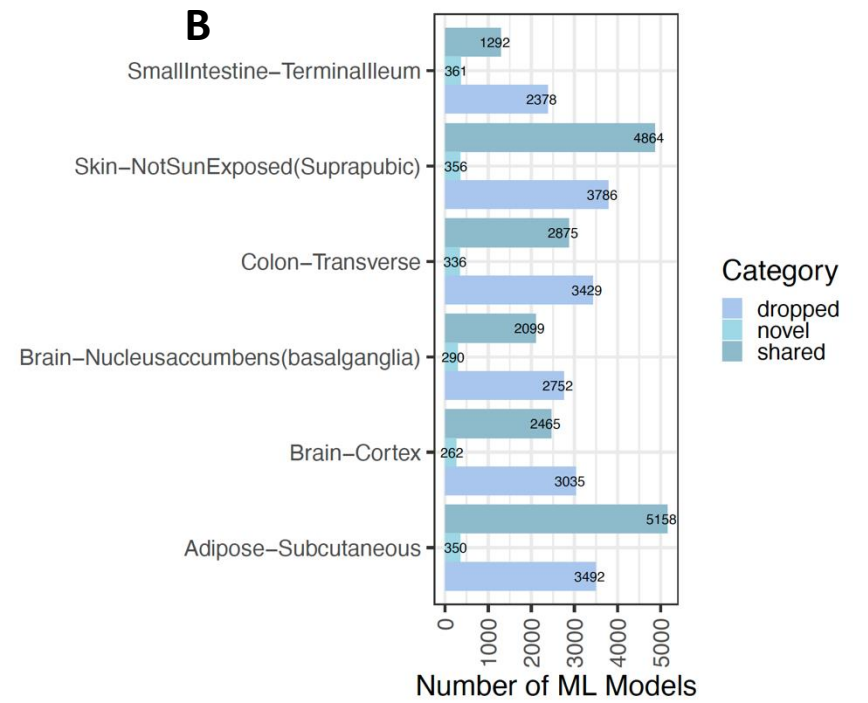**C**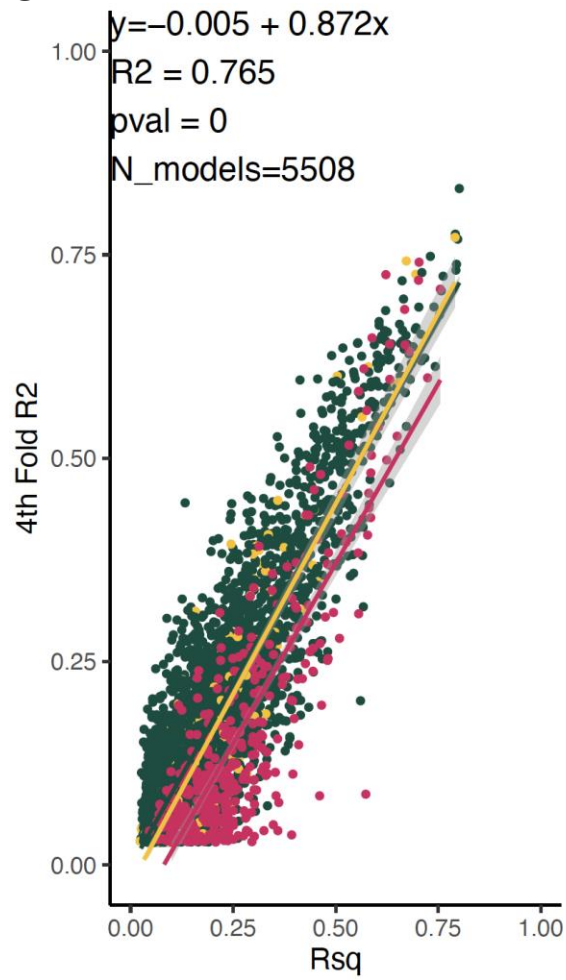**D**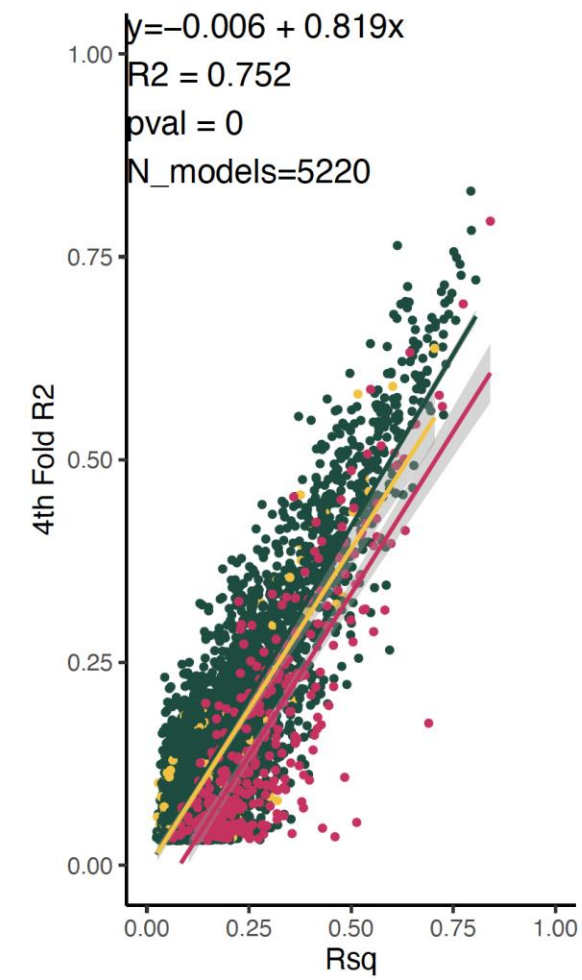**E**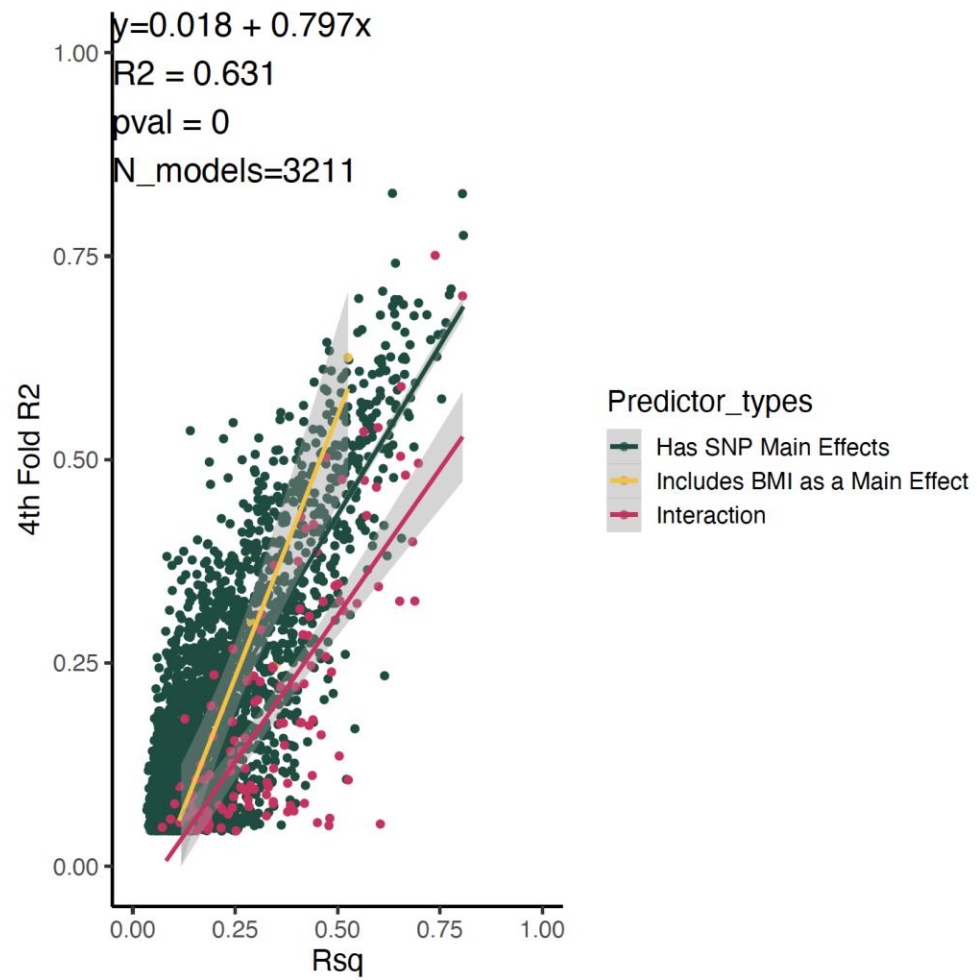**F**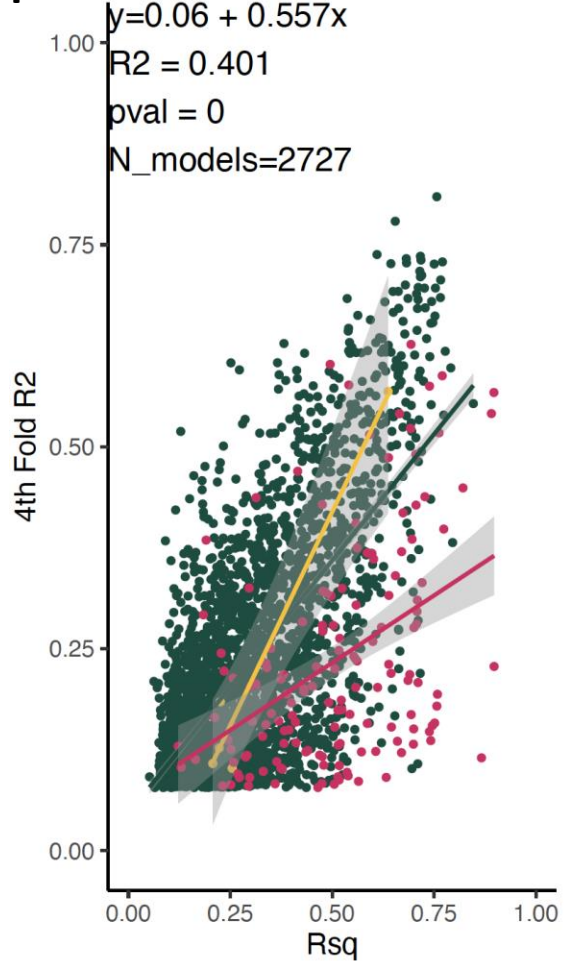**G**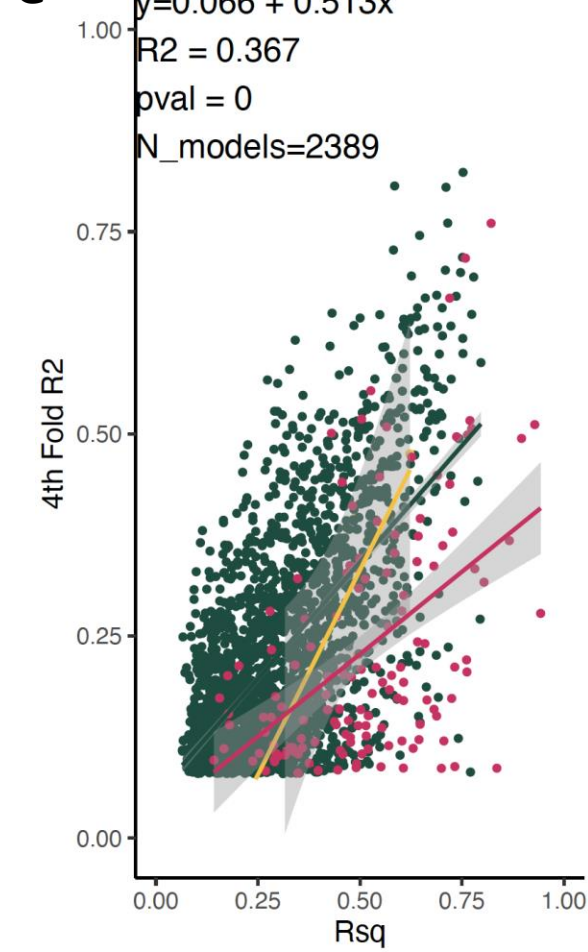**H**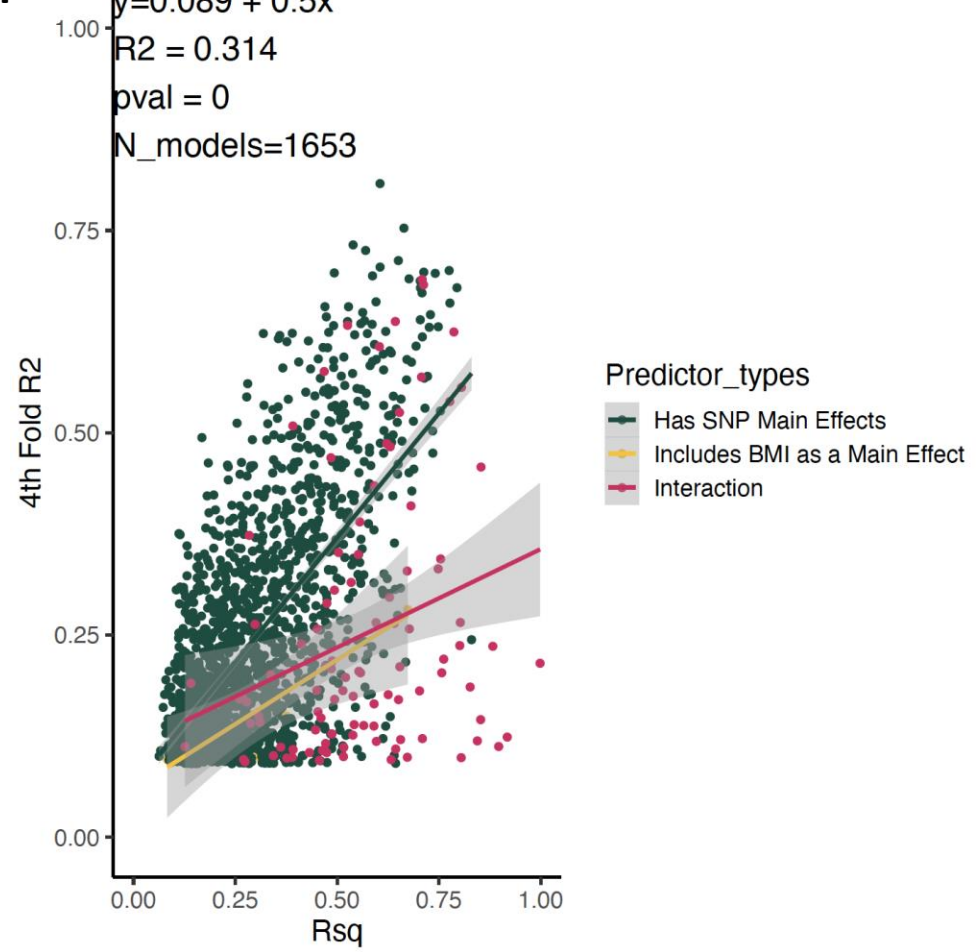

**A**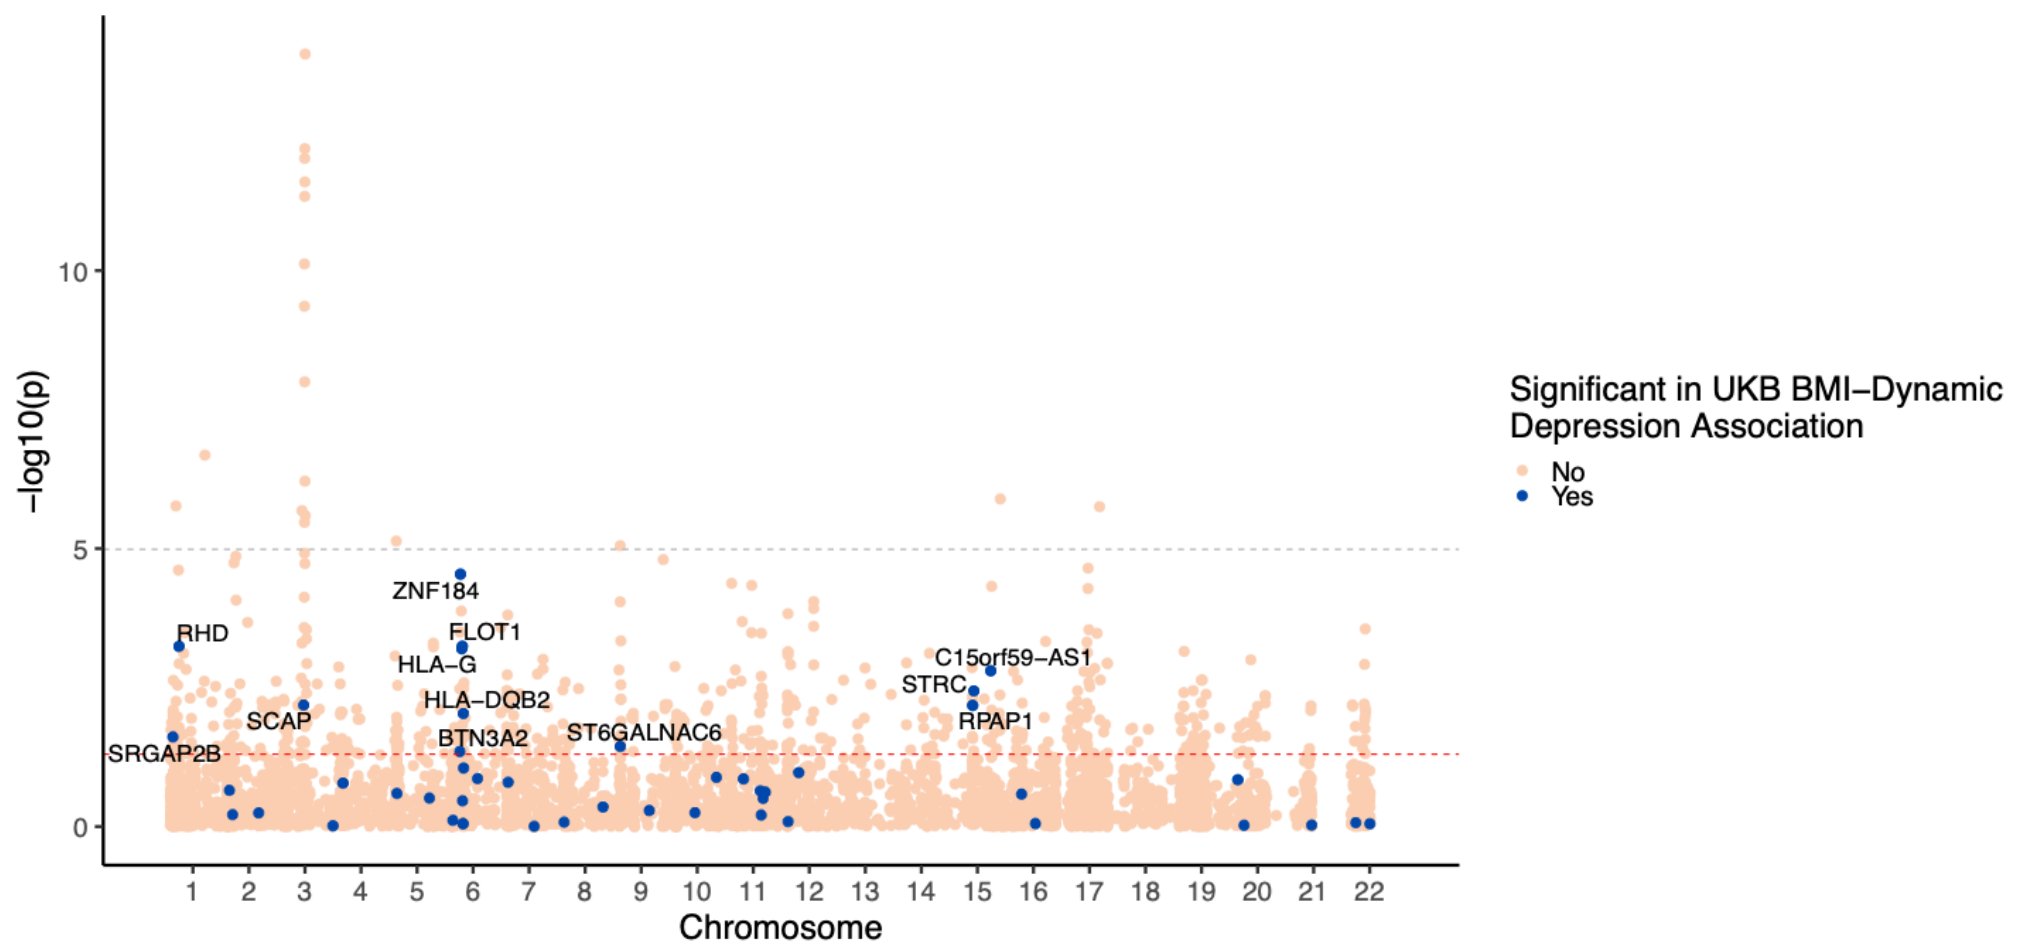**B**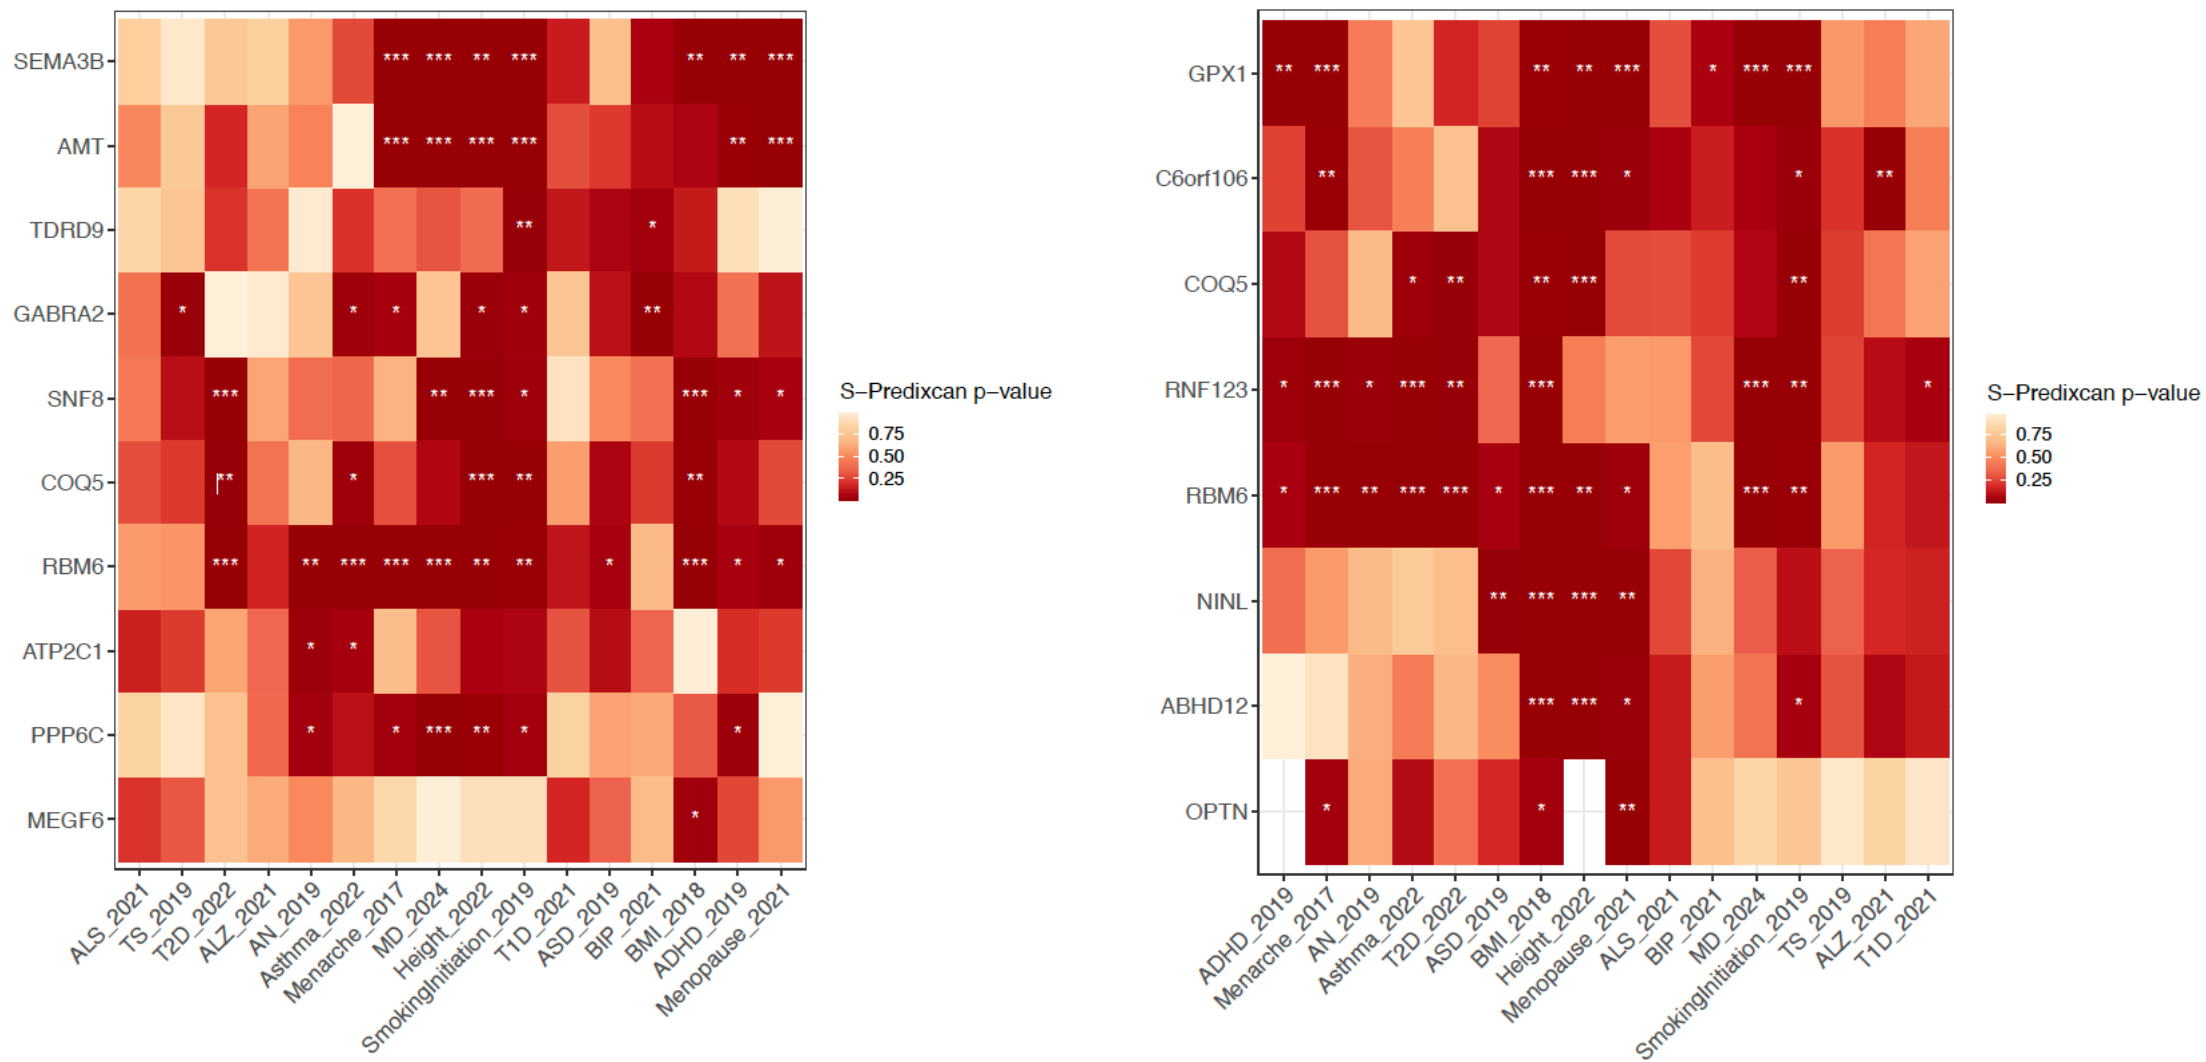**C**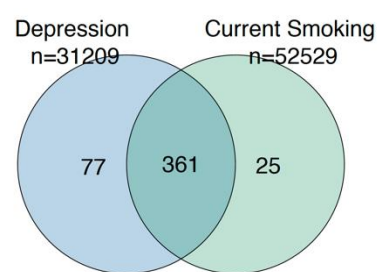**D**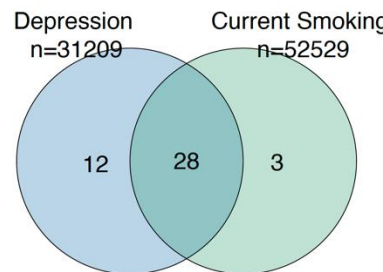**E**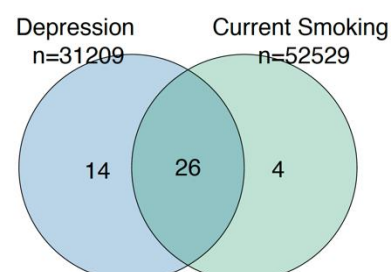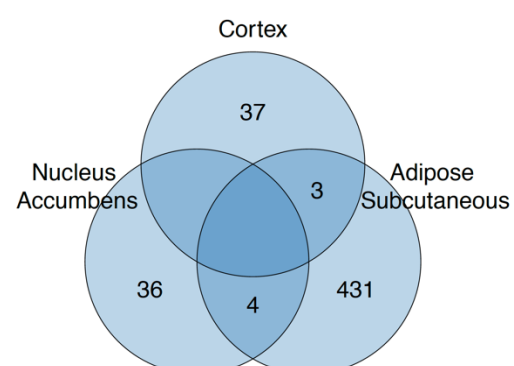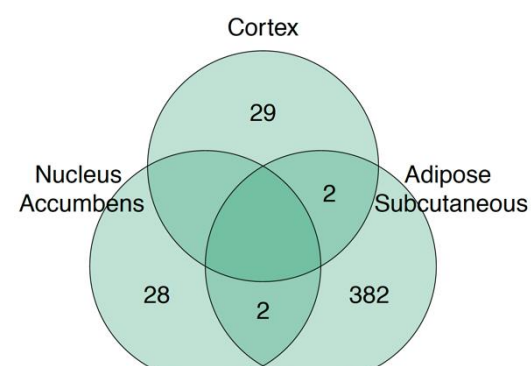

Supplement: Supplementary file [file media-1.pdf]
